# Supplementary material for: Macro- to nanoscale investigation unlocks gold and silver enrichment by lead-bismuth metallic melts in the Switchback epithermal deposit, southern Mexico
Source: publisher site journal article supplement (doi:10.2138/am-2024-9388), 2024-07-19
Supplement: Supplementary file 1 [file 9388_suppS1-S5.pdf › 9388_suppS1-S5.pdf]

Supplementary Materials for:

**Maco-to-nanoscale investigation unlocks gold and silver enrichment by lead-bismuth metallic melts in the Switchback epithermal deposit, southern Mexico**

Néstor Cano <sup>1</sup>, \*, José María González-Jiménez <sup>2</sup>, Antoni Camprubí <sup>3</sup>, Joaquín A. Proenza <sup>4</sup>, and Eduardo González-Partida <sup>5</sup>

<sup>1</sup>Programa de Posgrado en Ciencias de la Tierra, Universidad Nacional Autónoma de México. Ciudad Universitaria, 04510 Coyoacán, CDMX, Mexico

<sup>2</sup>Instituto Andaluz de Ciencias de la Tierra (IACT), Consejo Superior de Investigaciones Científicas (CSIC), Avda. de las Palmeras 4, 18100 Armilla, Granada, Spain

<sup>3</sup>Instituto de Geología, Universidad Nacional Autónoma de México. Ciudad Universitaria, 04510 Coyoacán, CDMX, Mexico

<sup>4</sup>Departament de Mineralogia, Petrologia i Geologia Aplicada, Facultat de Ciències de la Terra, Universitat de Barcelona, Martí i Franquès s/n, 08028 Barcelona, Catalonia, Spain

<sup>5</sup>Instituto de Geociencias, Universidad Nacional Autónoma de México. Blvd. Juriquilla 3001, 76230 Juriquilla, Qro., Mexico

\*Corresponding author (NC): [nacanoh@comunidad.unam.mx](mailto:nacanoh@comunidad.unam.mx)

**SUPPLEMENTARY FIGURES**

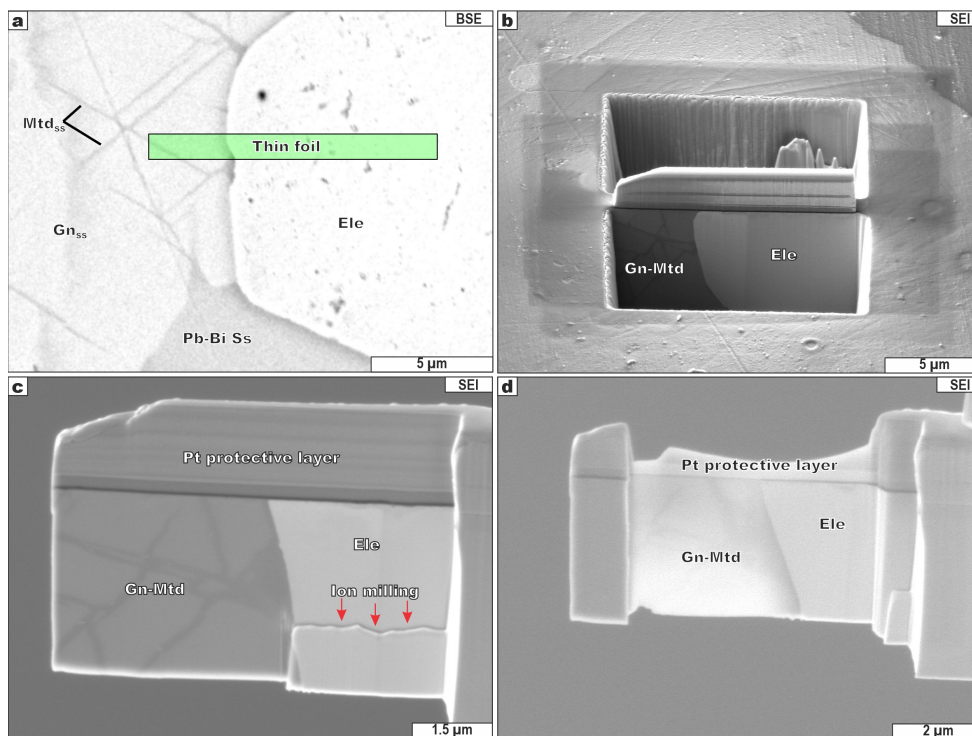

**Figure S1.** Thin foil preparation using focused-ion beam scanning electron microscopy (FIB-SEM). (a) Back-scattered electron (BSE) image of the sampled area (green area), comprising electrum, galena-matildite, and Pb-Bi sulfosalt (ourayite). (b). Secondary-electron image (SEI) showing a pre-milled cross-section of the thin foil. (c) SEI image of the milling processes. (d) SEI image of the sampled foil. Mineral abbreviations: Ele = electrum, Gn<sub>ss</sub> = galena<sub>ss</sub>, Mtd<sub>ss</sub> = matildite<sub>ss</sub>, Ss = Pb-Bi sulfosalt.

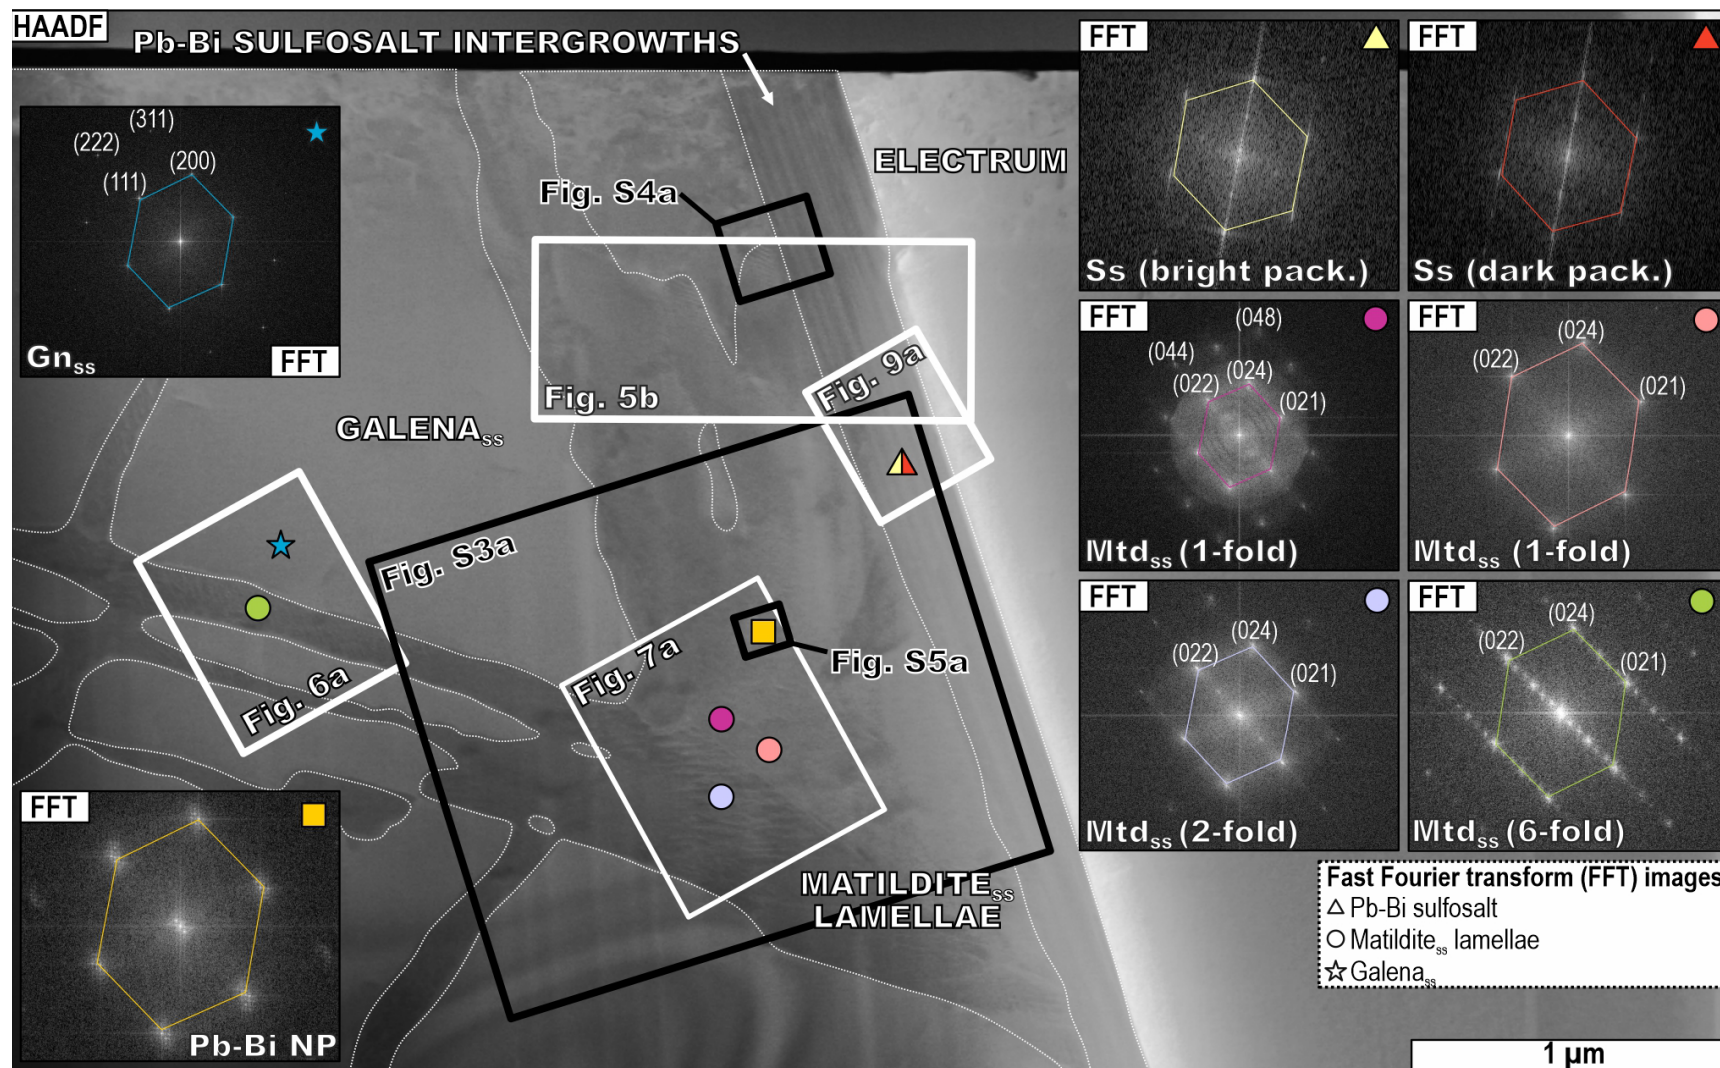

**Figure S2.** High-angle annular dark field (HAADF) image showing the location of the zoomed areas of Figs. 5–9 (main text) and S3–S5 (Supplementary Material) in the thin foil. Fast Fourier transform images are also included. Mineral abbreviations: Ele = electrum, Gn<sub>ss</sub> = galena<sub>ss</sub>, Mtd<sub>ss</sub> = matildite<sub>ss</sub>, Ss = Pb-Bi sulfosalt, Wid = Widmanstätten texture.



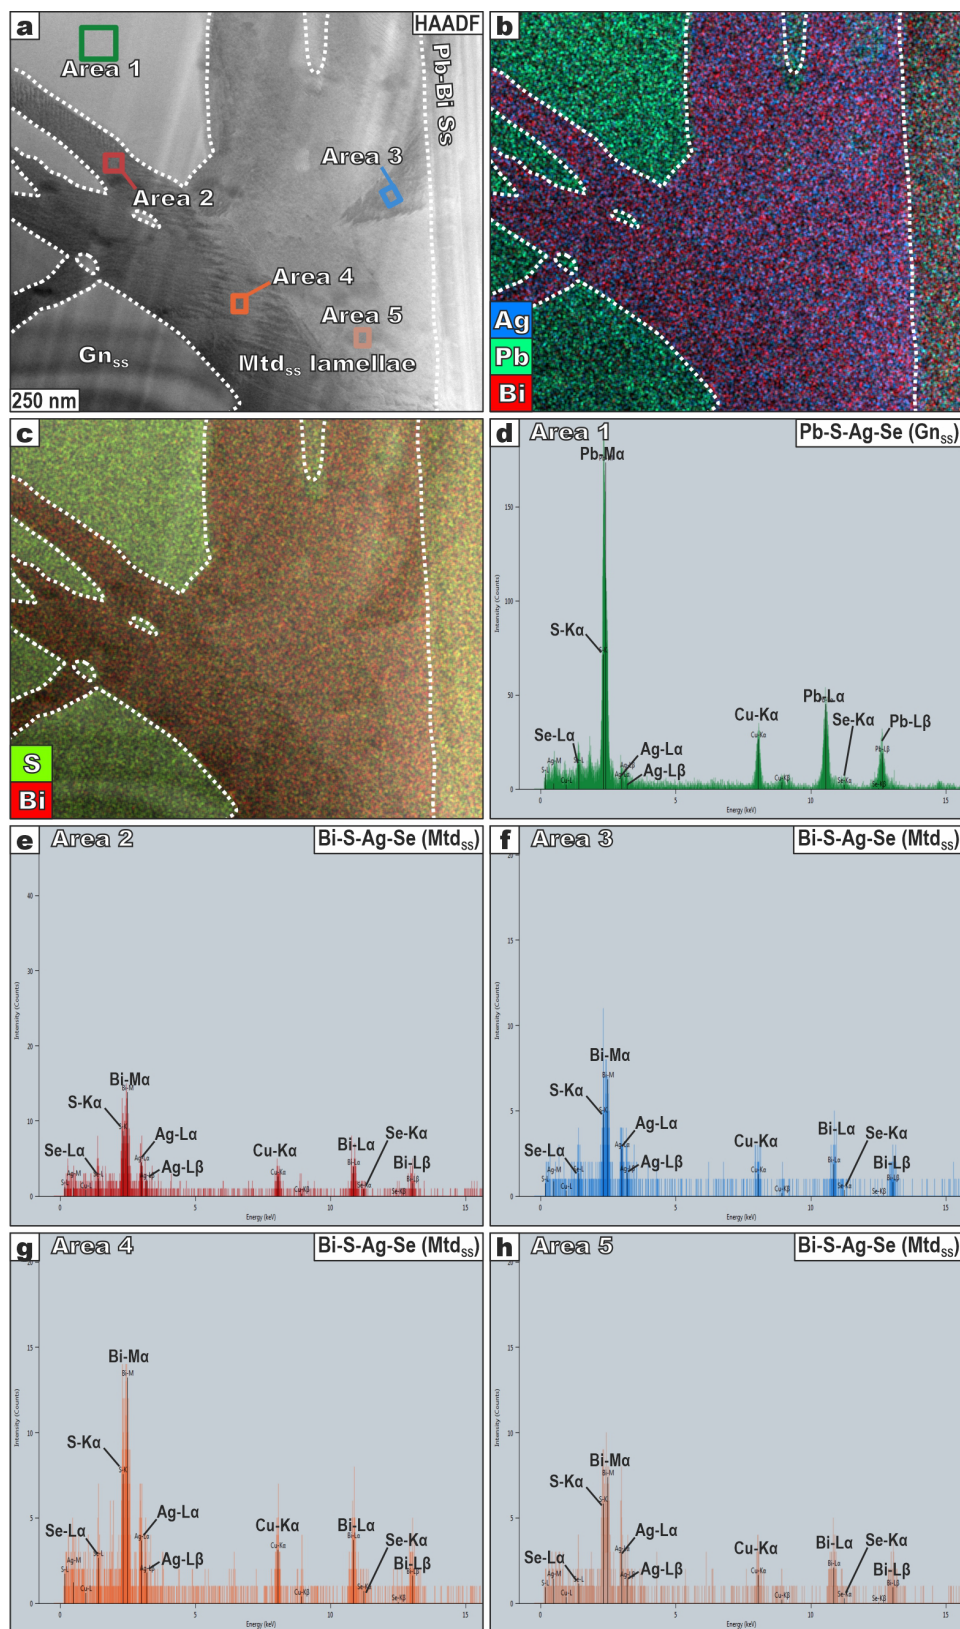

**Figure S3.** HAAFD image (a), elemental maps (b–c), and EDS (d–h) spectra of galena<sub>ss</sub>, matildite<sub>ss</sub>, and Pb-Bi sulfosalts. Mineral abbreviations as in Fig. S2.

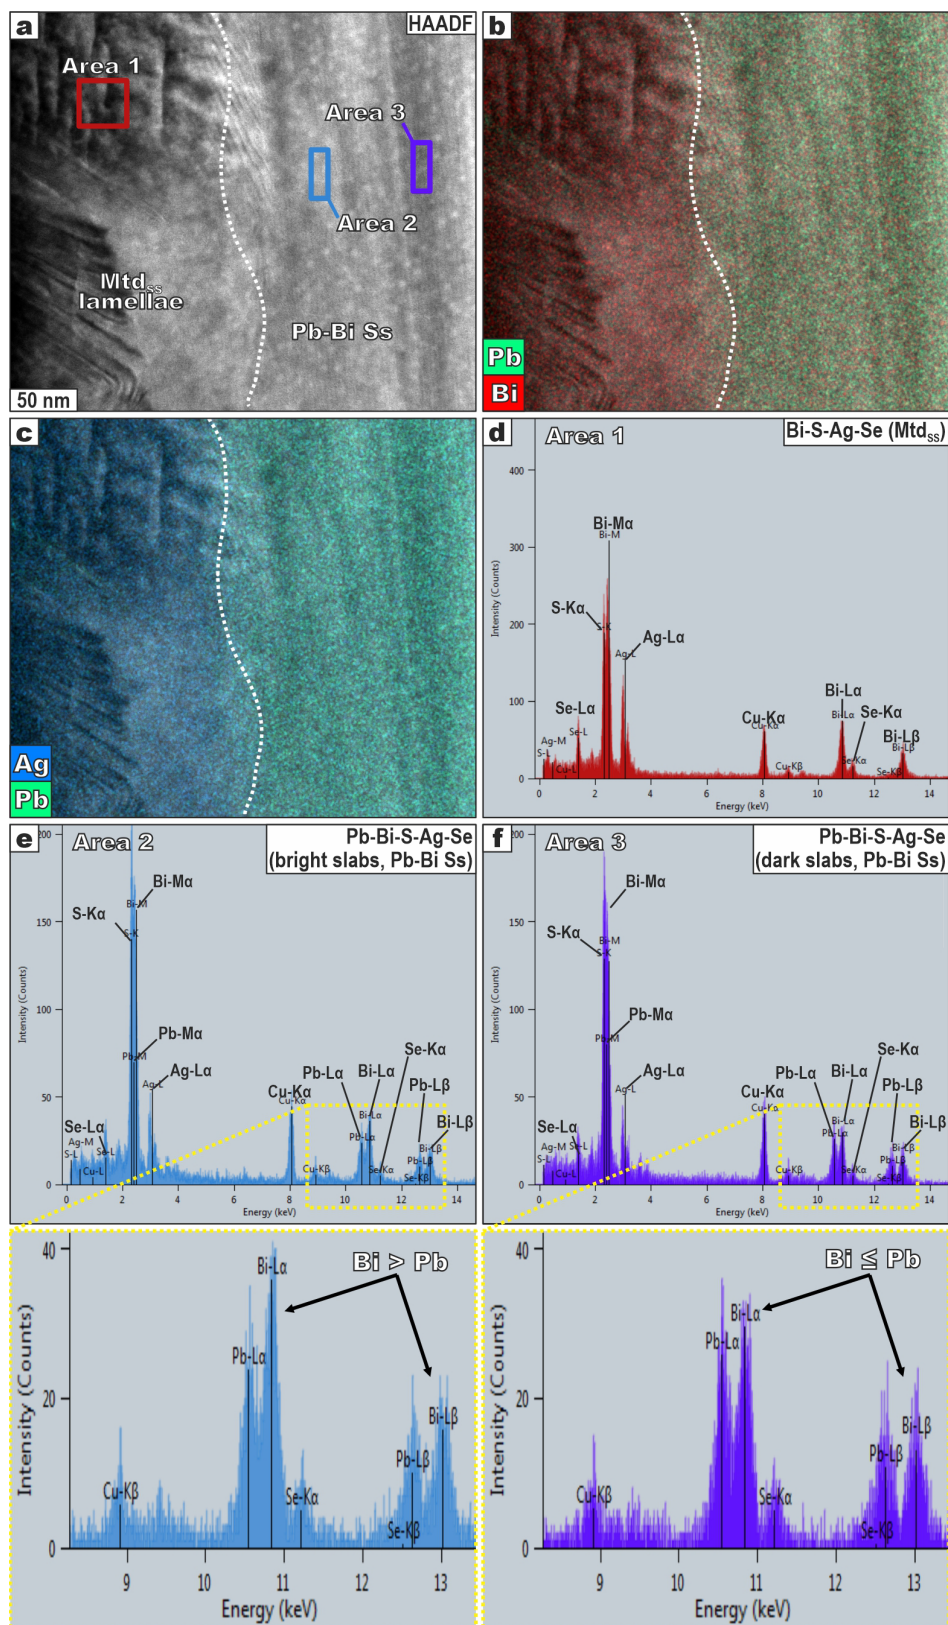

**Figure S4.** HAAFD image (a), elemental maps (b–c), and EDS (d–f) spectra of galena<sub>ss</sub>, matildite<sub>ss</sub>, and Pb-Bi sulfosalts. Mineral abbreviations as in Fig. S2.



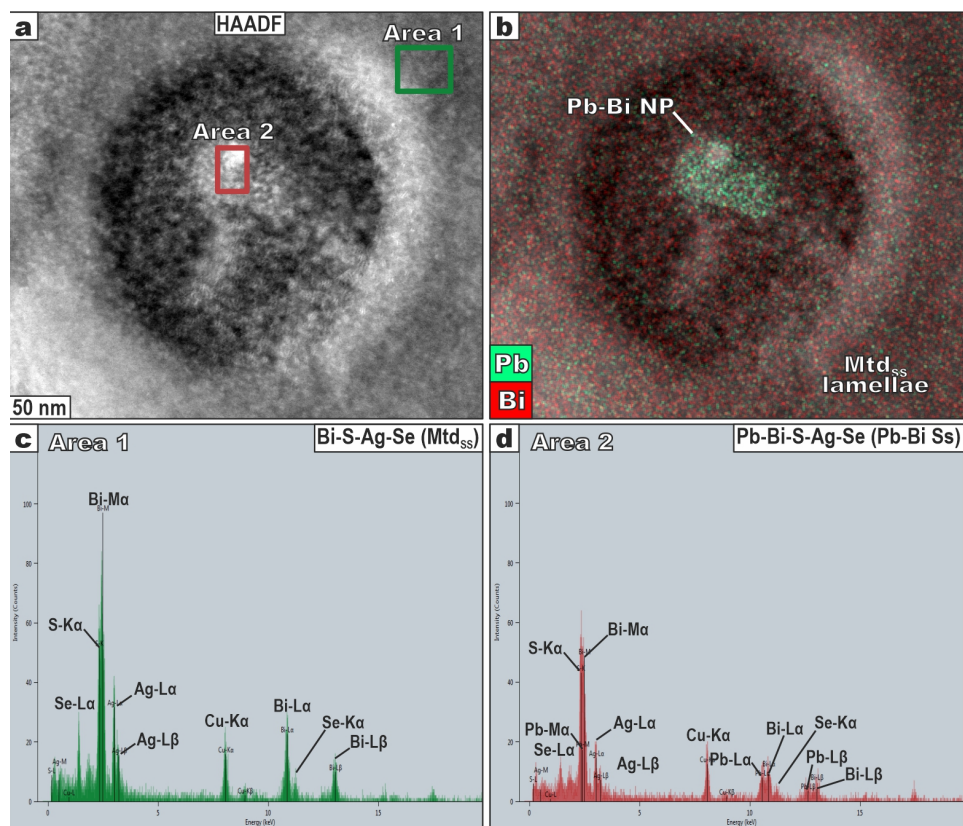

**Figure S5.** HAAFD image (a), Pb-Bi elemental map (b), and EDS (c–d) spectra of Pb-Bi-rich nanoparticle (NP) enclosed in matildite<sub>ss</sub>. Mineral abbreviations as in Fig. S2.
