# Supplementary material for: Macro- to nanoscale investigation unlocks gold and silver enrichment by lead-bismuth metallic melts in the Switchback epithermal deposit, southern Mexico
Source: publisher site journal article supplement (doi:10.2138/am-2024-9388), 2024-07-19
Supplement: Supplementary file 1 [file 9388_suppS1.xlsx]

## Sheet: Standards
Macro-to-nanoscale investigation unlocks gold and silver enrichment by lead-bismuth metallic melts in the Switchback epithermal deposit, southern Mexico
Néstor Cano 1,*, José María González-Jiménez 2, Antoni Camprubí 3, Joaquín A. Proenza 4
1Programa de Posgrado en Ciencias de la Tierra, Universidad Nacional Autónoma de México. Ciudad Universitaria, 04510 Coyoacán, CDMX, Mexico
2Instituto Andaluz de Ciencias de la Tierra (IACT), Consejo Superior de Investigaciones Científicas (CSIC), Avda. de las Palmeras 4, 18100 Armilla, Granada, Spain
3Instituto de Geología, Universidad Nacional Autónoma de México. Ciudad Universitaria, 04510 Coyoacán, CDMX, Mexico
4Departament de Mineralogia, Petrologia i Geologia Aplicada, Facultat de Ciències de la Terra, Universitat de Barcelona, Martí i Franquès s/n, 08028 Barcelona, Spain
5Instituto de Geociencias, Universidad Nacional Autónoma de México. Blvd. Juriquilla 3001, 76230 Juriquilla, Qro., Mexico
American Mineralogist: April 2025 Online Materials AM-25-49388
*nacanoh@comunidad.unam.mx
Supplementary Table S1. EPMA standards and results.
Element/X-ray	Standard	Crystal	Composition
Te/Lα	Te	PETJ	Te (100 wt.%)
Sb/Lα	Sb	PETJ	Sb (100 wt.%)
Bi/Mα	Bi	PETJ	Bi (100 wt.%)
Se/Lα	In2Se	TAP	In (49.22 wt.%), Se (50.78 wt.%)
As/Lβ	Arsenopyrite	TAP	Fe (34.00 wt.%), S (19.00 wt. %), As (47.00 wt. %)
S/Kα	PbS	PETL	Pb (86.6 wt.%), S (13.4 wt.%)
Pb/Mα	PbS	PETL	Pb (86.6 wt.%), S (13.4 wt.%)
Ag/Lα	Ag2S	PETL	Ag (87.06 wt.%), S (12.94 wt.%)
Cu/Kα	Chalcopyrite	LIFH	Cu (34.44 wt.%), Fe (30.45 wt.%), S (34.93 wt.%), Si (0.21 wt.%)
Au/Lα	Au	LIFH	Au (100 wt.%)

## Sheet: Pb-Bi minerals
Macro-to-nanoscale investigation unlocks gold and silver enrichment by lead-bismuth metallic melts in the Switchback epithermal deposit, southern Mexico
Néstor Cano 1,*, José María González-Jiménez 2, Antoni Camprubí 3, Joaquín A. Proenza 4
1Programa de Posgrado en Ciencias de la Tierra, Universidad Nacional Autónoma de México. Ciudad Universitaria, 04510 Coyoacán, CDMX, Mexico
2Instituto Andaluz de Ciencias de la Tierra (IACT), Consejo Superior de Investigaciones Científicas (CSIC), Avda. de las Palmeras 4, 18100 Armilla, Granada, Spain
3Instituto de Geología, Universidad Nacional Autónoma de México. Ciudad Universitaria, 04510 Coyoacán, CDMX, Mexico
4Departament de Mineralogia, Petrologia i Geologia Aplicada, Facultat de Ciències de la Terra, Universitat de Barcelona, Martí i Franquès s/n, 08028 Barcelona, Spain
5Instituto de Geociencias, Universidad Nacional Autónoma de México. Blvd. Juriquilla 3001, 76230 Juriquilla, Qro., Mexico
American Mineralogist: April 2025 Online Materials AM-25-49388
*nacanoh@comunidad.unam.mx
Supplementary Table S1. EPMA standards and results.
			wt.%											at.%											Ternary diagram (Fig. 4a)			%Cation (Cat) vs. %anion (An)				mol.% PbS, AgS, and BiS														a.p.f.u.
No.	Spot	Mineral	Te	Sb	Bi	Se	As	S	Pb	Ag	Cu	Au	Total	Te	Sb	Bi	Se	As	S	Pb	Ag	Cu	Au	Total	Bi	Ag+Cu	Pb	%Cat calc	%An calc	%Cat ideal	%An ideal	PbS wt.%	AgS wt.%	BiS wt.%	Total	PbS_N	AgS_N	BiS_N	PbS/at.	AgS/at	BiS/at	Total	PbS mol%	AgS mol%	BiS mol%	Bi	Sb	Se	S
1	041-c1-1	Galena	0.0471	0.0726	4.46	1.3	0	12.95	78.59	2.25	0	0	99.6697	0.000369122	0.000596255	0.0213417	0.016464	0	0.416868	0.379295	0.0208588	0	0	0.855793	0.0213417	0.0208588	0.379295	49.2521	50.7479	50	50	90.3728	2.89798	5.12298	98.3938	91.8481	2.94529	5.20661	0.385487	0.0211993	0.0216901	0.428377	89.9879	4.94875	5.06333	0.0506333		0.037994	0.962006
2	041-c1-2	Galena	0.0944	0	4.36	1.43	0.0239	13.1	77.41	2.27	0	0	98.6884	0.000739812	0	0.0208632	0.0181104	0.000319	0.421696	0.3736	0.0210442	0	0	0.856373	0.0208632	0.0210442	0.3736	48.5195	51.4805	50	50	89.0159	2.92374	5.00812	96.9477	91.8184	3.01579	5.16579	0.385363	0.0217067	0.02152	0.428589	89.9142	5.06469	5.02113	0.0502113		0.0411782	0.958822
3	041-c1-3	Galena	0	0	4.84	1.81	0	12.79	78.29	2.35	0	0	100.08	0	0	0.0231601	0.022923	0	0.411717	0.377847	0.0217858	0	0	0.857434	0.0231601	0.0217858	0.377847	49.3092	50.6908	50	50	90.0278	3.02678	5.55947	98.6141	91.2931	3.06932	5.6376	0.383158	0.022092	0.0234856	0.428735	89.3693	5.15283	5.47787	0.0547787		0.0527402	0.94726
60	041-c5-1	Galena	0.0752	0.0298	4.18	1.29	0	12.78	78.52	1.94	0	0	98.8151	0.000589342	0.000244744	0.0200019	0.0163374	0	0.411395	0.378958	0.0179849	0	0	0.845511	0.0200019	0.0179849	0.378958	49.3127	50.6873	50	50	90.2923	2.4987	4.80136	97.5924	92.5198	2.56034	4.91981	0.388306	0.0184286	0.0204953	0.42723	90.8892	4.3135	4.79725	0.0479725		0.0381953	0.961805
61	041-c5-2	Galena	0.0103	0.0116	4.18	1.29	0	13.06	78.53	2.12	0	0	99.202	8.0721e-05	9.52694e-05	0.0200019	0.0163374	0	0.420409	0.379006	0.0196536	0	0	0.855583	0.0200019	0.0196536	0.379006	48.9328	51.0672	50	50	90.3038	2.73054	4.80136	97.8357	92.3015	2.79094	4.90757	0.38739	0.0200884	0.0204444	0.427923	90.528	4.6944	4.77758	0.0477758		0.037407	0.962593
62	041-c5-3	Galena	0	0.0112	3.9	1.23	0.0055	12.93	78.15	2.07	0	0	98.2968	0	9.19842e-05	0.018662	0.0155775	7.34101e-05	0.416224	0.377172	0.0191901	0	0	0.846991	0.018662	0.0191901	0.377172	48.9998	51.0002	50	50	89.8668	2.66614	4.47974	97.0127	92.6341	2.74824	4.61768	0.388786	0.019781	0.0192367	0.427804	90.8795	4.62385	4.49662	0.0449662		0.0360756	0.963924
1	041SDP-c1-1	Galena	0.1132	0.062	2.89	1.02	0.0311	13.31	81.56	1.37	0	0	100.356	0.000887147	0.000509198	0.013829	0.0129179	0.000415101	0.428456	0.393629	0.0127007	0	0	0.863345	0.013829	0.0127007	0.393629	48.6664	51.3336	50	50	93.7881	1.76455	3.3196	98.8722	94.8579	1.78467	3.35746	0.398119	0.0128456	0.0139868	0.424952	93.6858	3.02283	3.29138	0.0329138		0.0292675	0.970732
2	041SDP-c1-2	Galena	0	0	2.97	0.8337	0	13.48	80.98	1.41	0.0177	0	99.6915	0	0	0.0142119	0.0105585	0	0.433929	0.39083	0.0130715	0.000278538	0	0.862879	0.0142119	0.01335	0.39083	48.4879	51.5121	50	50	93.1211	1.81607	3.41149	98.3487	94.6847	1.84656	3.46877	0.397392	0.013291	0.0144505	0.425134	93.4747	3.12631	3.39904	0.0339904		0.0237544	0.976246
3	041SDP-c1-3	Galena	0.2294	0	2.75	0.8992	0.0146	13.37	82	1.39	0	0	100.653	0.00179781	0	0.0131591	0.011388	0.00019487	0.430388	0.395753	0.0128861	0	0	0.865567	0.0131591	0.0128861	0.395753	48.7309	51.2691	50	50	94.2941	1.79031	3.15879	99.2432	95.0132	1.80396	3.18288	0.398771	0.0129844	0.0132595	0.425015	93.8252	3.05504	3.11977	0.0311977		0.0257779	0.974222
127	041SDP-c10-1	Galena	0.0591	0	3.34	1.61	0	13.19	79.78	1.64	0	0	99.6191	0.000463166	0	0.0159824	0.0203901	0	0.424594	0.385039	0.0152037	0	0	0.861672	0.0159824	0.0152037	0.385039	48.3043	51.6957	50	50	91.7412	2.1123	3.83649	97.69	93.9105	2.16225	3.92721	0.394143	0.0155632	0.0163603	0.426067	92.5074	3.65277	3.83984	0.0383984		0.0458221	0.954178
128	041SDP-c10-2	Galena	0.0209	0	3.25	1.46	0	13.01	79.12	1.74	0.0092	0	98.6102	0.000163793	0	0.0155517	0.0184904	0	0.418799	0.381853	0.0161308	0.000144777	0	0.851134	0.0155517	0.0162756	0.381853	48.6035	51.3965	50	50	90.9823	2.2411	3.73311	96.9565	93.8382	2.31145	3.8503	0.39384	0.0166372	0.0160399	0.426517	92.3386	3.9007	3.76067	0.0376067		0.042284	0.957716
129	041SDP-c10-3	Galena	0.071	0	3.41	1.63	0.0154	13.32	79.8	1.79	0	0	100.036	0.000556426	0	0.0163173	0.0206434	0.000205548	0.428778	0.385135	0.0165943	0	0	0.86823	0.0163173	0.0165943	0.385135	48.1493	51.8507	50	50	91.7642	2.3055	3.9169	97.9866	93.6497	2.35287	3.99738	0.393049	0.0169353	0.0166526	0.426637	92.1273	3.96949	3.90323	0.0390323		0.0459332	0.954067
		Average S.D. (%)			11.9	8.49		1.71	1.65	7.42
		Average DL (ppm)	1430	1343	3432	669	1444	313	1979	655	794	2602
4	041-c2-1	Galena (ss)	0	0.0124	7.03	2.45	0	12.61	74.71	3.76	0	0	100.572	0	0.00010184	0.0336395	0.0310284	0	0.405923	0.360569	0.0348574	0	0	0.86612	0.0336395	0.0348574	0.360569	49.5389	50.4611	50	50	85.9111	4.84284	8.07501	98.8289	86.9291	4.90023	8.17069	0.364842	0.0352704	0.0340381	0.434151	84.0358	8.124	7.84017	0.0784017		0.071011	0.928989
5	041-c2-2	Galena (ss)	0	0.0429	6.56	2.55	0.0037	12.54	74.79	3.51	0	0	99.9967	0	0.000352332	0.0313905	0.0322948	4.9385e-05	0.40367	0.360956	0.0325397	0	0	0.861252	0.0313905	0.0325397	0.360956	49.3335	50.6665	50	50	86.0031	4.52085	7.53515	98.0591	87.7054	4.61033	7.68429	0.3681	0.0331838	0.0320118	0.433296	84.9536	7.65846	7.38799	0.0738799		0.0740767	0.925923
6	041-c2-3	Galena (ss)	0	0	7.06	2.43	0	13.26	70.06	3.69	1.61	0	98.1101	0	0	0.0337831	0.0307751	0	0.426847	0.338127	0.0342084	0.025336	0	0.889077	0.0337831	0.0595444	0.338127	48.5284	51.4716	50	50	80.5639	4.75268	8.10947	93.4261	86.2328	5.08711	8.68009	0.36192	0.0366155	0.0361602	0.434695	83.2582	8.42325	8.31852	0.0831852		0.06725	0.93275
10	041-c2-7	Galena (ss)	0.042	0.1022	6.47	2.63	0	12.64	75.6	3.4	0	0	100.884	0.000329154	0.000839356	0.0309598	0.033308	0	0.406889	0.364865	0.0315199	0	0	0.86871	0.0309598	0.0315199	0.364865	49.193	50.807	50	50	86.9345	4.37917	7.43177	98.7455	88.039	4.4348	7.52619	0.3695	0.0319204	0.0313532	0.432774	85.3795	7.37577	7.2447	0.072447		0.0756662	0.924334
11	041-c2-8	Galena (ss)	0	0	5.93	2.42	0	12.75	75.89	3.01	0.1819	0	100.182	0	0	0.0283759	0.0306484	0	0.41043	0.366264	0.0279044	0.00286249	0	0.866485	0.0283759	0.0307669	0.366264	49.0957	50.9043	50	50	87.268	3.87685	6.8115	97.9564	89.0887	3.95773	6.9536	0.373906	0.0284866	0.0289679	0.43136	86.6806	6.6039	6.71547	0.0671547		0.0694853	0.930515
12	041-c2-9	Galena (ss)	0	0.015	5.75	2.3	0	12.51	75.15	2.95	0	0	98.6751	0	0.000123193	0.0275145	0.0291287	0	0.402704	0.362693	0.0273482	0	0	0.849512	0.0275145	0.0273482	0.362693	49.1524	50.8476	50	50	86.4171	3.79957	6.60474	96.8214	89.2541	3.92431	6.82157	0.3746	0.028246	0.0284178	0.431264	86.861	6.54959	6.58943	0.0658943		0.0674536	0.932546
16	041-c2-13	Galena (ss)	0	0.2015	9.51	2.36	0	13.06	71.26	4.26	0	0	100.651	0	0.00165489	0.0455067	0.0298886	0	0.420409	0.343919	0.0394926	0	0	0.88087	0.0455067	0.0394926	0.343919	48.6925	51.3075	50	50	81.9438	5.48684	10.9237	98.3543	83.3149	5.57864	11.1064	0.349673	0.0401534	0.0462681	0.436095	80.1829	9.2075	10.6096	0.106096		0.0663751	0.933625
17	041-c2-14	Galena (ss)	0	0.1567	8.03	2.37	0	12.96	72.55	4.12	0	0	100.187	0	0.00128696	0.0384247	0.0300152	0	0.41719	0.350145	0.0381948	0	0	0.875256	0.0384247	0.0381948	0.350145	48.7588	51.2412	50	50	83.4272	5.30652	9.22366	97.9574	85.1668	5.41717	9.41599	0.357446	0.0389912	0.0392259	0.435663	82.0464	8.94985	9.00372	0.0900372		0.0671173	0.932883
22	041-c3-1	Galena (ss)	0.0959	0.0454	7.72	2.56	0	12.86	72.13	3.99	0	0	99.4014	0.000751567	0.000372865	0.0369413	0.0324215	0	0.413971	0.348118	0.0369896	0	0	0.869565	0.0369413	0.0369896	0.348118	48.5356	51.4644	50	50	82.9443	5.13908	8.86758	96.9509	85.5528	5.3007	9.14646	0.359066	0.0381529	0.038103	0.435322	82.4829	8.7643	8.75285	0.0875285		0.07263	0.92737
23	041-c3-2	Galena (ss)	0.0415	0.1713	7.02	2.65	0	12.74	73.43	3.78	0	0	99.8328	0.000325235	0.00140687	0.0335917	0.0335613	0	0.410108	0.354392	0.0350428	0	0	0.868428	0.0335917	0.0350428	0.354392	48.7118	51.2882	50	50	84.4392	4.8686	8.06353	97.3713	86.7187	5.00004	8.28121	0.363959	0.0359888	0.0344985	0.434447	83.7754	8.28383	7.9408	0.079408		0.0756449	0.924355
32	041-c3-11	Galena (ss)	0	0.0296	7.35	2.59	0	12.26	72.4	3.72	0	0	98.3497	0	0.000243101	0.0351708	0.0328014	0	0.394656	0.349421	0.0344865	0	0	0.846779	0.0351708	0.0344865	0.349421	49.4909	50.5091	50	50	83.2548	4.79132	8.44258	96.4887	86.2845	4.96569	8.74982	0.362137	0.0357415	0.0364507	0.434329	83.3784	8.22914	8.39241	0.0839241		0.076736	0.923264
35	041-c3-14	Galena (ss)	0	0.0585	8.33	2.54	0	12.43	71.96	4.53	0	0.2855	100.134	0	0.000480453	0.0398602	0.0321682	0	0.400129	0.347297	0.0419957	0	0.00144948	0.86338	0.0398602	0.0419957	0.347297	49.8741	50.1259	50	50	82.7488	5.8346	9.56826	98.1516	84.3071	5.94447	9.74844	0.353837	0.0427865	0.0406108	0.437235	80.9262	9.78571	9.2881	0.092881		0.0744122	0.925588
40	041-c4-3	Galena (ss)	0	0.0271	7.87	3.97	0.0349	11.63	70.87	3.92	0.001	0	98.3231	0	0.000222569	0.037659	0.0502786	0.00046582	0.374376	0.342037	0.0363406	1.57366e-05	0	0.841395	0.037659	0.0363564	0.342037	49.4479	50.5521	50	50	81.4954	5.04892	9.03988	95.5842	85.2603	5.28217	9.45751	0.357838	0.0380195	0.0393988	0.435257	82.2132	8.73497	9.05186	0.0905186		0.118399	0.881601
41	041-c4-4	Galena (ss)	0.1592	0	9.93	3.63	0	11.84	67.34	5.21	0.2229	0	98.3322	0.00124765	0	0.0475164	0.0459726	0	0.381136	0.325	0.0482997	0.0035077	0	0.85268	0.0475164	0.0518074	0.325	49.7635	50.2365	50	50	77.4361	6.71043	11.4061	95.5527	81.0403	7.02276	11.937	0.340127	0.0505477	0.049728	0.440402	77.2309	11.4776	11.2915	0.112915		0.107637	0.892363
42	041-c4-5	Galena (ss)	0.166	0	9.56	3.82	0	11.96	67.97	4.99	0.3268	0	98.7928	0.00130094	0	0.0457459	0.0483789	0	0.384999	0.328041	0.0462602	0.00514273	0	0.859868	0.0457459	0.0514029	0.328041	49.4482	50.5518	50	50	78.1606	6.42707	10.9811	95.5687	81.7847	6.72508	11.4903	0.343251	0.0484051	0.047867	0.439523	78.0962	11.0131	10.8907	0.108907		0.111632	0.888368
48	041-c4-11	Galena (ss)	0	0	6.47	3.9	0	12.05	73.24	3.45	0.0119	0	99.1219	0	0	0.0309598	0.0493921	0	0.387896	0.353475	0.0319835	0.000187266	0	0.853894	0.0309598	0.0321707	0.353475	48.7889	51.2111	50	50	84.2207	4.44357	7.43177	96.096	87.6422	4.62409	7.73369	0.367835	0.0332828	0.0322176	0.433335	84.8846	7.68061	7.4348	0.074348		0.112951	0.887049
70	041-c6-6	Galena (ss)	0	0	7	4.85	0	11.48	72.35	3.96	0.0138	0	99.6539	0	0	0.033496	0.0614235	0	0.369548	0.34918	0.0367115	0.000217166	0	0.850575	0.033496	0.0369286	0.34918	49.3318	50.6682	50	50	83.1973	5.10044	8.04055	96.3383	86.3595	5.29431	8.34617	0.362452	0.0381068	0.0347691	0.435328	83.2595	8.7536	7.98689	0.0798689		0.142523	0.857477
4	041SDP-c2-1	Galena (ss)	0.1089	0.1269	8.45	5.58	0	11.13	69.14	4.43	0	0	98.9659	0.000853448	0.00104221	0.0404344	0.0706687	0	0.358281	0.333687	0.0410686	0	0	0.846036	0.0404344	0.0410686	0.333687	49.0748	50.9252	50	50	79.506	5.7058	9.7061	94.9179	83.7629	6.0113	10.2258	0.351554	0.0432675	0.0425994	0.437421	80.3697	9.89152	9.73877	0.0973877		0.164748	0.835252
5	041SDP-c2-2	Galena (ss)	0	0	8.36	5.77	0	11.31	69.36	4.33	0	0	99.1301	0	0	0.0400038	0.073075	0	0.364075	0.334749	0.0401416	0	0	0.852045	0.0400038	0.0401416	0.334749	48.694	51.306	50	50	79.759	5.577	9.60272	94.9387	84.011	5.87432	10.1146	0.352595	0.0422816	0.0421364	0.437013	80.683	9.67513	9.64191	0.0964191		0.167162	0.832838
6	041SDP-c2-3	Galena (ss)	0.0999	0.0112	6.81	5.62	0	11.14	71.73	3.63	0	0	99.0412	0.000782915	9.19842e-05	0.0325868	0.0711753	0	0.358603	0.346187	0.0336522	0	0	0.843079	0.0325868	0.0336522	0.346187	48.919	51.081	50	50	82.4843	4.6754	7.82231	94.982	86.842	4.92241	8.23557	0.364477	0.0354301	0.0343084	0.434215	83.9392	8.15956	7.90124	0.0790124		0.165609	0.834391
13	041SDP-c3-1	Galena (ss)	0.1229	0.0754	9.6	5.88	0	11.28	68.38	4.84	0.0012	0	100.179	0.000963166	0.000619251	0.0459373	0.0744681	0	0.36311	0.330019	0.0448696	1.8884e-05	0	0.860005	0.0459373	0.0448885	0.330019	48.9352	51.0648	50	50	78.632	6.23387	11.027	95.893	81.9998	6.50087	11.4993	0.344154	0.0467913	0.0479048	0.43885	78.4218	10.6623	10.916	0.10916		0.170183	0.829817
14	041SDP-c3-2	Galena (ss)	0.084	0.0699	7.85	5.55	0	11	69.86	3.8	0.0258	0	98.2398	0.000658307	0.00057408	0.0375633	0.0702888	0	0.354096	0.337162	0.0352282	0.000406005	0	0.835977	0.0375633	0.0356342	0.337162	49.0874	50.9126	50	50	80.3339	4.89436	9.0169	94.2452	85.2393	5.19322	9.56749	0.35775	0.0373793	0.039857	0.434986	82.244	8.59321	9.16282	0.0916282		0.165625	0.834375
15	041SDP-c3-3	Galena (ss)	0.0891	0	8.5	5.75	0	11.11	70.14	4.1	0.006	0	99.6951	0.000698276	0	0.0406737	0.0728217	0	0.357637	0.338514	0.0380093	9.44198e-05	0	0.848448	0.0406737	0.0381038	0.338514	49.1828	50.8172	50	50	80.6559	5.28076	9.76353	95.7002	84.2798	5.51802	10.2022	0.353723	0.0397171	0.0425011	0.435941	81.1401	9.11066	9.74928	0.0974928		0.169172	0.830828
22	041SDP-c3-10	Galena (ss)	0	0.0147	7.3	4.92	0	11.54	70.77	3.99	0	0	98.5347	0	0.000120729	0.0349315	0.06231	0	0.371479	0.341554	0.0369896	0	0	0.847385	0.0349315	0.0369896	0.341554	48.7942	51.2058	50	50	81.3804	5.13908	8.38515	94.9046	85.7497	5.415	8.83534	0.359892	0.0389755	0.036807	0.435674	82.6057	8.94602	8.44827	0.0844827		0.143641	0.856359
23	041SDP-c3-11	Galena (ss)	0	0.0999	6.41	4.96	0	11.32	72.63	3.39	0	0	98.81	0	0.000820466	0.0306727	0.0628166	0	0.364397	0.350531	0.0314272	0	0	0.840665	0.0306727	0.0314272	0.350531	49.0839	50.9161	50	50	83.5192	4.36629	7.36285	95.2484	87.6857	4.58411	7.73016	0.368018	0.032995	0.0322029	0.433216	84.9502	7.61631	7.43346	0.0743346		0.147038	0.852962
24	041SDP-c3-12	Galena (ss)	0.0142	0	8.15	5.3	0	11.65	70.28	4.33	0	0	99.7243	0.000111285	0	0.0389989	0.0671226	0	0.37502	0.339189	0.0401416	0	0	0.860584	0.0389989	0.0401416	0.339189	48.61	51.39	50	50	80.8169	5.577	9.3615	95.7554	84.3993	5.82421	9.77647	0.354225	0.041921	0.0407276	0.436873	81.0818	9.59568	9.32252	0.0932252		0.151812	0.848188
25	041SDP-c3-13	Galena (ss)	0	0.0756	8.65	4.92	0	11.77	69.3	4.59	0	0	99.3057	0	0.000620894	0.0413914	0.06231	0	0.378883	0.334459	0.0425519	0	0	0.860217	0.0413914	0.0425519	0.334459	48.6392	51.3608	50	50	79.69	5.91188	9.93583	95.5377	83.4121	6.188	10.3999	0.350081	0.0445394	0.0433247	0.437945	79.9372	10.1701	9.89273	0.0989273		0.141231	0.858769
26	041SDP-c3-14	Galena (ss)	0	0.0736	7.47	4.91	0	11.49	70.54	3.89	0	0	98.3736	0	0.000604468	0.035745	0.0621834	0	0.36987	0.340444	0.0360625	0	0	0.844909	0.035745	0.0360625	0.340444	48.7924	51.2076	50	50	81.1159	5.01028	8.58042	94.7066	85.6497	5.29032	9.06	0.359472	0.0380782	0.0377429	0.435293	82.5816	8.7477	8.67067	0.0867067		0.143925	0.856075
31	041SDP-c4-1	Galena (ss)	0.0111	0.0646	6.47	5.99	0	10.97	72.09	3.45	0	0	99.0457	8.69906e-05	0.000530552	0.0309598	0.0758612	0	0.353131	0.347925	0.0319835	0	0	0.840477	0.0309598	0.0319835	0.347925	48.8851	51.1149	50	50	82.8983	4.44357	7.43177	94.7736	87.4698	4.68861	7.8416	0.367111	0.0337472	0.0326672	0.433526	84.6804	7.78437	7.53523	0.0753523		0.176836	0.823164
32	041SDP-c4-2	Galena (ss)	0	0	8.05	6.24	0	10.94	70.9	4.38	0.0218	0	100.532	0	0	0.0385204	0.0790274	0	0.352165	0.342181	0.0406051	0.000343059	0	0.852842	0.0385204	0.0409482	0.342181	49.4406	50.5594	50	50	81.5299	5.6414	9.24663	96.4179	84.5588	5.85099	9.59016	0.354894	0.0421137	0.0399515	0.436959	81.219	9.63789	9.14306	0.0914306		0.183276	0.816724
33	041SDP-c4-3	Galena (ss)	0	0.1423	6.04	6.12	0	11	74.12	3.3	0.3891	0	101.111	0	0.00116869	0.0289022	0.0775076	0	0.354096	0.357722	0.0305929	0.00612312	0	0.856113	0.0289022	0.036716	0.357722	49.4491	50.5509	50	50	85.2326	4.25037	6.93785	96.4209	88.3965	4.40814	7.19538	0.371001	0.0317285	0.0299751	0.432704	85.74	7.33261	6.92738	0.0692738		0.17958	0.82042
34	041SDP-c4-4	Galena (ss)	0	0	6.83	6	0	11.06	72.71	3.62	0.0736	0	100.293	0	0	0.0326825	0.0759878	0	0.356028	0.350917	0.0335595	0.00115822	0	0.850333	0.0326825	0.0347177	0.350917	49.1945	50.8055	50	50	83.6112	4.66253	7.84528	96.119	86.9872	4.85078	8.16205	0.365086	0.0349145	0.0340021	0.434002	84.1207	8.04477	7.83454	0.0783454		0.175891	0.824109
45	041SDP-c4-15	Galena (ss)	0.1813	0	6.16	2.61	0	13.02	75.15	3.3	0.0097	0	100.431	0.00142085	0	0.0294764	0.0330547	0	0.419121	0.362693	0.0305929	0.000152645	0	0.876512	0.0294764	0.0307455	0.362693	48.2498	51.7502	50	50	86.4171	4.25037	7.07569	97.7431	88.4124	4.34851	7.23906	0.371068	0.0312993	0.0301571	0.432524	85.7912	7.23643	6.97234	0.0697234		0.0731014	0.926899
49	041SDP-c4-19	Galena (ss)	0	0	5.63	3.5	0	12.58	74.7	2.98	0.0102	0	99.4003	0	0	0.0269403	0.0443262	0	0.404957	0.360521	0.0276263	0.000160514	0	0.864532	0.0269403	0.0277868	0.360521	48.0316	51.9684	50	50	85.8996	3.83821	6.4669	96.2047	89.2883	3.98963	6.72202	0.374744	0.0287162	0.0280031	0.431463	86.8542	6.65553	6.49027	0.0649027		0.0986598	0.90134
51	041SDP-c4-21	Galena (ss)	0	0.0317	6.06	3.85	0	12.13	74.18	3.58	0.1203	0	99.9521	0	0.000260348	0.0289979	0.0487589	0	0.390472	0.358012	0.0331887	0.00189312	0	0.861582	0.0289979	0.0350818	0.358012	48.9903	51.0097	50	50	85.3016	4.61101	6.96082	96.8735	88.0547	4.75982	7.18548	0.369566	0.0342598	0.0299338	0.43376	85.2007	7.89833	6.90101	0.0690101		0.11101	0.88899
52	041SDP-c4-22	Galena (ss)	0	0.02	3.98	2.65	0.0018	12.67	78.62	2.2	0	0	100.142	0	0.000164258	0.0190448	0.0335613	2.40251e-05	0.407854	0.37944	0.0203953	0	0	0.860484	0.0190448	0.0203953	0.37944	48.6796	51.3204	50	50	90.4073	2.83358	4.57163	97.8125	92.4292	2.89695	4.67387	0.387926	0.0208514	0.0194708	0.428248	90.5844	4.869	4.54661	0.0454661		0.076031	0.923969
53	041SDP-c4-23	Galena (ss)	0	0	6.56	3.39	0	12.36	73.17	3.52	0.0153	0	99.0153	0	0	0.0313905	0.0429331	0	0.397875	0.353137	0.0326324	0.00024077	0	0.858209	0.0313905	0.0328732	0.353137	48.6362	51.3638	50	50	84.1402	4.53373	7.53515	96.2091	87.4556	4.71237	7.83205	0.367052	0.0339182	0.0326274	0.433597	84.6527	7.82252	7.52481	0.0752481		0.0973963	0.902604
59	041SDP-c5-1	Galena (ss)	0	0	6.72	2.88	0.0197	12.47	72.9	3.46	0	0	98.4498	0	0	0.0321561	0.0364742	0.000262942	0.401416	0.351834	0.0320762	0	0	0.85422	0.0321561	0.0320762	0.351834	48.7072	51.2928	50	50	83.8297	4.45645	7.71893	96.0051	87.318	4.64189	8.04013	0.366474	0.0334109	0.0334942	0.433379	84.562	7.70939	7.72861	0.0772861		0.0832952	0.916705
60	041SDP-c5-2	Galena (ss)	0	0.0245	6.5	2.81	0.0073	12.53	74.09	3.53	0	0	99.4918	0	0.000201216	0.0311034	0.0355876	9.74352e-05	0.403348	0.357577	0.0327251	0	0	0.86064	0.0311034	0.0327251	0.357577	48.9642	51.0358	50	50	85.1981	4.54661	7.46623	97.211	87.6425	4.67705	7.68044	0.367836	0.033664	0.0319958	0.433496	84.8534	7.7657	7.38087	0.0738087		0.0810772	0.918923
61	041SDP-c5-3	Galena (ss)	0	0	6.21	2.58	0	12.68	73.42	3.45	0	0	98.34	0	0	0.0297157	0.0326748	0	0.408176	0.354344	0.0319835	0	0	0.856894	0.0297157	0.0319835	0.354344	48.5524	51.4476	50	50	84.4277	4.44357	7.13312	96.0044	87.9415	4.6285	7.42999	0.369091	0.0333146	0.0309525	0.433358	85.17	7.68754	7.14246	0.0714246		0.0741175	0.925883
62	041SDP-c5-4	Galena (ss)	0.0564	0	7.09	2.63	0	12.87	72.41	3.42	0	0	98.4765	0.000442006	0	0.0339266	0.033308	0	0.414293	0.349469	0.0317054	0	0	0.863144	0.0339266	0.0317054	0.349469	48.0918	51.9082	50	50	83.2663	4.40493	8.14393	95.8151	86.9031	4.59732	8.49963	0.364733	0.0330901	0.0354084	0.433231	84.1889	7.63798	8.1731	0.081731		0.0744146	0.925585
63	041SDP-c5-5	Galena (ss)	0.0515	0.0483	5.86	2.65	0	12.72	74.57	2.86	0	0	98.7598	0.000403605	0.000396682	0.0280409	0.0335613	0	0.409464	0.359894	0.0265138	0	0	0.858274	0.0280409	0.0265138	0.359894	48.2886	51.7114	50	50	85.7501	3.68365	6.73109	96.1648	89.1699	3.83056	6.99953	0.374247	0.0275712	0.0291592	0.430977	86.8368	6.39738	6.76584	0.0676584		0.0757548	0.924245
64	041SDP-c5-6	Galena (ss)	0	0	6.15	2.73	0	12.53	73.95	3.2	0	0	98.5601	0	0	0.0294286	0.0345745	0	0.403348	0.356902	0.0296658	0	0	0.853918	0.0294286	0.0296658	0.356902	48.7161	51.2839	50	50	85.0371	4.12157	7.0642	96.2229	88.3752	4.28336	7.34149	0.370911	0.0308303	0.0305838	0.432325	85.7945	7.13128	7.07425	0.0707425		0.0789511	0.921049
75	041SDP-c6-3	Galena (ss)	0	0.0345	7.17	2.66	0	12.57	73.03	3.62	0	0	99.0846	0	0.000283344	0.0343094	0.0336879	0	0.404635	0.352461	0.0335595	0	0	0.858937	0.0343094	0.0335595	0.352461	48.9361	51.0639	50	50	83.9792	4.66253	8.23582	96.8776	86.6859	4.8128	8.50127	0.363821	0.0346411	0.0354153	0.433878	83.8534	7.98407	8.16249	0.0816249		0.0768564	0.923144
76	041SDP-c6-4	Galena (ss)	0	0.1742	6.9	2.75	0	12.71	73.42	3.91	0	0	99.8643	0	0.00143068	0.0330175	0.0348278	0	0.409142	0.354344	0.0362479	0	0	0.86901	0.0330175	0.0362479	0.354344	48.7462	51.2538	50	50	84.4277	5.03604	7.92569	97.3894	86.6908	5.17104	8.13814	0.363842	0.0372196	0.0339025	0.434964	83.6487	8.55693	7.79432	0.0779432		0.0784462	0.921554
93	041SDP-c7-9	Galena (ss)	0	0.1223	6.62	2.84	0	12.39	73.77	3.58	0	0	99.3223	0	0.00100443	0.0316776	0.0359676	0	0.398841	0.356033	0.0331887	0	0	0.856712	0.0316776	0.0331887	0.356033	49.1296	50.8704	50	50	84.8302	4.61101	7.60407	97.0452	87.413	4.7514	7.83559	0.366873	0.0341992	0.0326421	0.433714	84.5886	7.88518	7.52618	0.0752618		0.0827205	0.91728
94	041SDP-c7-10	Galena (ss)	0	0.0726	5.09	2.39	0	12.68	75.87	2.72	0	0	98.8227	0	0.000596255	0.0243564	0.0302685	0	0.408176	0.366168	0.025216	0	0	0.854781	0.0243564	0.025216	0.366168	48.637	51.363	50	50	87.245	3.50333	5.84663	96.595	90.3204	3.62683	6.05273	0.379076	0.0261048	0.0252149	0.430395	88.0761	6.06532	5.85855	0.0585855		0.069036	0.930964
96	041SDP-c8-1	Galena (ss)	0	0.05	7.91	4.78	0.0267	11.77	70.96	4.34	0	0	99.8368	0	0.000410644	0.0378504	0.060537	0.000356373	0.378883	0.342471	0.0402343	0	0	0.860743	0.0378504	0.0402343	0.342471	48.8596	51.1404	50	50	81.5989	5.58988	9.08582	96.2746	84.7564	5.80618	9.43741	0.355723	0.0417912	0.0393151	0.43683	81.433	9.56693	9.0001	0.090001		0.137766	0.862234
97	041SDP-c8-2	Galena (ss)	0	0.0348	6.8	4.49	0	11.71	71.81	3.84	0	0	98.6849	0	0.000285808	0.0325389	0.0568642	0	0.376952	0.346573	0.035599	0	0	0.848813	0.0325389	0.035599	0.346573	48.8578	51.1422	50	50	82.5763	4.94588	7.81082	95.333	86.6188	5.18801	8.1932	0.36354	0.0373417	0.0341319	0.435013	83.5698	8.58404	7.84617	0.0784617		0.131079	0.868921
98	041SDP-c8-3	Galena (ss)	0.0195	0	6.38	4.65	0	11.59	72.12	3.45	0	0	98.2096	0.000152821	0	0.0305292	0.0588906	0	0.373089	0.348069	0.0319835	0	0	0.842714	0.0305292	0.0319835	0.348069	48.7214	51.2786	50	50	82.9328	4.44357	7.32839	94.7047	87.5698	4.69202	7.73814	0.367531	0.0337718	0.0322362	0.433539	84.7746	7.78979	7.43558	0.0743558		0.136327	0.863673
99	041SDP-c8-4	Galena (ss)	0	0	8.14	4.72	0.0212	11.65	69.1	4.48	0	0	98.1113	0	0	0.038951	0.0597771	0.000282962	0.37502	0.333494	0.0415322	0	0	0.849058	0.038951	0.0415322	0.333494	48.7573	51.2427	50	50	79.46	5.7702	9.35001	94.5802	84.0133	6.10085	9.8858	0.352605	0.0439121	0.0411831	0.4377	80.5586	10.0325	9.40897	0.0940897		0.137483	0.862517
109	041SDP-c8-14	Galena (ss)	0	0	6.9	5.87	0	10.91	71.24	3.75	0	0	98.6701	0	0	0.0330175	0.0743414	0	0.351199	0.343822	0.0347646	0	0	0.837145	0.0330175	0.0347646	0.343822	49.1676	50.8324	50	50	81.9208	4.82996	7.92569	94.6765	86.5271	5.10154	8.37134	0.363155	0.0367194	0.034874	0.434748	83.5322	8.44613	8.02164	0.0802164		0.174699	0.825301
110	041SDP-c8-15	Galena (ss)	0	0	6.9	5.95	0	10.84	70.91	3.69	0	0	98.2901	0	0	0.0330175	0.0753546	0	0.348946	0.34223	0.0342084	0	0	0.833756	0.0330175	0.0342084	0.34223	49.1098	50.8902	50	50	81.5414	4.75268	7.92569	94.2197	86.5438	5.04426	8.41192	0.363225	0.0363071	0.035043	0.434575	83.5816	8.35461	8.06374	0.0806374		0.177597	0.822403
112	041SDP-c8-17	Galena (ss)	0	0.0476	6.76	3.08	0	12.36	73.01	3.66	0	0	98.9177	0	0.000390933	0.0323475	0.0390071	0	0.397875	0.352365	0.0339303	0	0	0.855916	0.0323475	0.0339303	0.352365	48.9116	51.0884	50	50	83.9562	4.71404	7.76488	96.4351	87.0598	4.88831	8.05192	0.365391	0.0351846	0.0335433	0.434118	84.1684	8.10483	7.72676	0.0772676		0.0892851	0.910715
117	041SDP-c9-1	Galena (ss)	0.0175	0	4.88	1.89	0	12.98	76.64	2.49	0.0436	0	98.9412	0.000137147	0	0.0233515	0.0239362	0	0.417834	0.369884	0.0230837	0.000686117	0	0.858912	0.0233515	0.0237698	0.369884	48.5504	51.4496	50	50	88.1305	3.2071	5.60541	96.943	90.9096	3.30823	5.78218	0.381548	0.0238117	0.0240878	0.429448	88.8463	5.54472	5.60903	0.0560903		0.0541825	0.945818
119	041SDP-c9-3	Galena (ss)	0.0346	0.0505	5.21	1.57	0.0219	13.02	76.77	2.72	0.0348	0	99.4319	0.00027116	0.00041475	0.0249306	0.0198835	0.000292306	0.419121	0.370512	0.025216	0.000547635	0	0.861189	0.0249306	0.0257636	0.370512	48.9098	51.0902	50	50	88.2799	3.50333	5.98447	97.7677	90.2956	3.58332	6.12111	0.378971	0.0257917	0.0254998	0.430263	88.079	5.99441	5.92656	0.0592656		0.0452922	0.954708
120	041SDP-c9-4	Galena (ss)	0	0	5.08	2.03	0	12.9	76.86	2.79	0.0243	0	99.6843	0	0	0.0243085	0.0257092	0	0.415258	0.370946	0.0258649	0.0003824	0	0.862469	0.0243085	0.0262473	0.370946	48.8715	51.1285	50	50	88.3834	3.59349	5.83514	97.8121	90.3605	3.67387	5.96567	0.379244	0.0264435	0.0248522	0.430539	88.0857	6.14194	5.77235	0.0577235		0.0583018	0.941698
121	041SDP-c9-5	Galena (ss)	0.105	0.1057	4.85	1.75	0	13.11	77.2	2.57	0	0	99.6908	0.000822884	0.000868101	0.0232079	0.0221631	0	0.422018	0.372587	0.0238254	0	0	0.865493	0.0232079	0.0238254	0.372587	48.4834	51.5166	50	50	88.7744	3.31014	5.57095	97.6555	90.9057	3.3896	5.7047	0.381532	0.0243974	0.0237651	0.429694	88.7915	5.67784	5.5307	0.055307		0.0498965	0.950103
122	041SDP-c9-6	Galena (ss)	0	0	4.53	1.83	0	12.91	76.74	2.39	0	0	98.4	0	0	0.0216767	0.0231763	0	0.41558	0.370367	0.0221567	0	0	0.852957	0.0216767	0.0221567	0.370367	48.5605	51.4395	50	50	88.2454	3.0783	5.20339	96.5271	91.4204	3.18905	5.39059	0.383692	0.0229538	0.0224566	0.429102	89.4174	5.34927	5.23338	0.0523338		0.0528227	0.947177
123	041SDP-c9-7	Galena (ss)	0	0	4.53	1.93	0	12.95	76.62	2.55	0.0025	0	98.5826	0	0	0.0216767	0.0244428	0	0.416868	0.369788	0.02364	3.93416e-05	0	0.856454	0.0216767	0.0236793	0.369788	48.4724	51.5276	50	50	88.1075	3.28438	5.20339	96.5952	91.2131	3.40014	5.38679	0.382822	0.0244732	0.0224407	0.429736	89.0831	5.69495	5.22198	0.0522198		0.0553867	0.944613
		Average S.D. (%)			12.46	5.79		1.7	1.59	7.4
		Average DL (ppm)	1493	1352	3329	729	1429	324	1872	644	783	2545
13	041-c2-10	Matildite (ss)	0	0.6724	33.92	2.92	0	14.19	30.11	18.85	0	0	100.662	0	0.00552234	0.162312	0.0369807	0	0.456784	0.145319	0.17475	0	0	0.981668	0.162312	0.17475	0.145319	49.1389	50.8611	50	50	34.6243	24.2786	38.9622	97.8652	35.3796	24.8082	39.8121	0.148489	0.178562	0.165853	0.492903	30.1253	36.2266	33.6481	0.672962		0.149791	1.85021
14	041-c2-11	Matildite (ss)	0.0419	0.6385	32.22	3.15	0	14.34	32.52	18.26	0	0.0057	101.176	0.00032837	0.00524392	0.154177	0.0398936	0	0.461613	0.15695	0.169281	0	2.89389e-05	0.987515	0.154177	0.169281	0.15695	48.6511	51.3489	50	50	37.3956	23.5187	37.0095	97.9239	38.1885	24.0173	37.7942	0.160277	0.17287	0.157446	0.490593	32.6701	35.2369	32.093	0.64186		0.159095	1.8409
64	041-cx-2	Matildite (ss)	0	0.3698	34.59	4.76	0	13.41	27.32	18.61	0	0	99.0599	0	0.00303712	0.165518	0.0602837	0	0.431676	0.131853	0.172525	0	0	0.964893	0.165518	0.172525	0.131853	48.6993	51.3007	50	50	31.416	23.9695	39.7318	95.1173	33.0287	25.1999	41.7714	0.138622	0.181382	0.174014	0.494018	28.0601	36.7156	35.2243	0.704487		0.245076	1.75492
15	041-c2-12	Matildite (ss)	0	1.07	30.84	3.07	0.0067	14.23	33.37	17.79	0.0195	0	100.396	0	0.00878778	0.147574	0.0388804	8.94268e-05	0.458072	0.161052	0.164923	0.000306864	0	0.979686	0.147574	0.16523	0.161052	48.3682	51.6318	50	50	38.3731	22.9133	35.4244	96.7108	39.6782	23.6926	36.6292	0.16653	0.170533	0.152593	0.489655	34.0096	34.8271	31.1633	0.623266		0.156476	1.84352
7	041SDP-c2-4	Matildite (ss)	0	0.483	35.57	6.77	0	12.73	27.32	17.7	0.0288	0.8724	101.474	0	0.00396682	0.170207	0.0857396	0	0.409786	0.131853	0.164089	0.000453215	0.00442918	0.970525	0.170207	0.164542	0.131853	48.5338	51.4662	50	50	31.416	22.7974	40.8575	95.0709	33.0448	23.9794	42.9758	0.138689	0.172597	0.179032	0.490318	28.2856	35.2009	36.5134	0.730269		0.346055	1.65394
9	041SDP-c2-6	Matildite (ss)	0	0.0994	36.33	6.84	0	12.53	26.74	19.1	0	0	101.639	0	0.00081636	0.173844	0.0866261	0	0.403348	0.129054	0.177068	0	0	0.970756	0.173844	0.177068	0.129054	49.4425	50.5575	50	50	30.7491	24.6006	41.7305	97.0801	31.6739	25.3405	42.9856	0.132936	0.182394	0.179073	0.494402	26.8882	36.8918	36.2201	0.724401		0.353595	1.64641
10	041SDP-c2-7	Matildite (ss)	0.0824	0.0888	35.88	6.66	0	12.58	24.88	19.79	0	0	99.9613	0.000645768	0.000729304	0.171691	0.0843465	0	0.404957	0.120077	0.183465	0	0	0.965912	0.171691	0.183465	0.120077	49.2004	50.7996	50	50	28.6102	25.4893	41.2136	95.3131	30.0171	26.7427	43.2402	0.125982	0.192486	0.180133	0.498602	25.267	38.6052	36.1277	0.722555		0.344761	1.65524
16	041SDP-c3-4	Matildite (ss)	0.1026	0.1415	37.15	6.97	0	12.36	25.26	19.18	0.026	0	101.19	0.000804075	0.00116212	0.177768	0.0882725	0	0.397875	0.121911	0.17781	0.000409152	0	0.966012	0.177768	0.178219	0.121911	49.4712	50.5288	50	50	29.0472	24.7037	42.6724	96.4232	30.1247	25.62	44.2553	0.126433	0.184405	0.184362	0.495201	25.5317	37.2385	37.2298	0.744595		0.363151	1.63685
30	041SDP-c3-18	Matildite (ss)	0	0.0589	30.92	5.72	0.0414	12.73	34.15	16.93	0	0.0864	100.637	0	0.000483739	0.147956	0.0724417	0.000552578	0.409786	0.164817	0.156951	0	0.000438653	0.953427	0.147956	0.156951	0.164817	49.3129	50.6871	50	50	39.27	21.8057	35.5163	96.592	40.6556	22.575	36.7694	0.170632	0.162488	0.153177	0.486297	35.088	33.4134	31.4986	0.629972		0.300446	1.69955
35	041SDP-c4-5	Matildite (ss)	0	0.1578	31.31	7.52	0	12.14	32.47	17.97	0.0076	0	101.575	0	0.00129599	0.149823	0.0952381	0	0.390793	0.156708	0.166592	0.000119598	0	0.960571	0.149823	0.166712	0.156708	49.2669	50.7331	50	50	37.3381	23.1452	35.9642	96.4476	38.7134	23.9977	37.2889	0.16248	0.172728	0.155341	0.49055	33.1221	35.2112	31.6667	0.633334		0.391901	1.6081
80	041SDP-c6-8	Matildite (ss)	0	0.3209	34.43	3.4	0	14.64	29.15	19.23	0	0.7714	101.942	0	0.00263551	0.164752	0.0430598	0	0.47127	0.140685	0.178273	0	0.0039164	1.00459	0.164752	0.178273	0.140685	48.5398	51.4602	50	50	33.5204	24.7681	39.548	97.8365	34.2616	25.3158	40.4226	0.143796	0.182215	0.168396	0.494407	29.0846	36.8553	34.0601	0.681202		0.16744	1.83256
81	041SDP-c6-9	Matildite (ss)	0	0.4126	39.71	3.39	0.0105	14.72	21.77	21.88	0.0015	0	101.895	0	0.00338863	0.190018	0.0429331	0.000140147	0.473845	0.105068	0.20284	2.36049e-05	0	1.01826	0.190018	0.202864	0.105068	48.9021	51.0979	50	50	25.0339	28.1812	45.6129	98.8281	25.3308	28.5154	46.1538	0.106314	0.205245	0.192271	0.50383	21.1011	40.737	38.1619	0.763238		0.166157	1.83384
82	041SDP-c6-10	Matildite (ss)	0	0.2515	39.87	3.35	0	14.73	21.38	21.69	0.0034	0	101.275	0	0.00206554	0.190783	0.0424265	0	0.474167	0.103185	0.201079	5.35045e-05	0	1.01376	0.190783	0.201132	0.103185	48.8381	51.1619	50	50	24.5855	27.9365	45.7967	98.3187	25.0059	28.4143	46.5799	0.10495	0.204517	0.194046	0.503513	20.8435	40.6181	38.5384	0.770768		0.164255	1.83574
		Average S.D. (%)			3.18	3.49		1.74	2.95	2.03
		Average DL (ppm)	1357	1320	3136	693	1562	260	1522	592	747	2387
73	041-c6-9	Widmanstätten	0.012	0.1727	23.21	5.47	0	12.26	45.73	13.09	0	0	99.9448	9.40439e-05	0.00141836	0.111063	0.0692756	0	0.394656	0.220705	0.121352	0	0	0.918564	0.111063	0.121352	0.220705	49.3291	50.6709	50	50	52.5862	16.8598	26.6602	96.1062	54.7168	17.5429	27.7403	0.229647	0.126268	0.115563	0.471478	48.7078	26.7814	24.5108	0.245108		0.149323	0.850677
74	041-c6-10	Widmanstätten	0.0144	0.213	22.76	5.51	0	12.3	46.94	12.69	0	0	100.427	0.000112853	0.00174934	0.10891	0.0697822	0	0.395944	0.226544	0.117644	0	0	0.920686	0.10891	0.117644	0.226544	49.2131	50.7869	50	50	53.9776	16.3446	26.1433	96.4655	55.9554	16.9435	27.1012	0.234845	0.121954	0.1129	0.469699	49.999	25.9643	24.0367	0.240367		0.149835	0.850165
21	041-c2-18	Widmanstätten	0.0078	0.2383	26.64	2.64	0	13.8	42.04	14.92	0	0	100.286	6.11285e-05	0.00195713	0.127476	0.0334347	0	0.44423	0.202896	0.138317	0	0	0.948372	0.127476	0.138317	0.202896	49.4204	50.5796	50	50	48.343	19.2168	30.6	98.1598	49.2492	19.5771	31.1737	0.206699	0.14091	0.129866	0.477475	43.2901	29.5115	27.1984	0.271984		0.0699961	0.930004
8	041-c2-5	Widmanstätten	0.0083	0.3041	22.14	2.9	0	13.54	49.73	13.32	0	0	101.942	6.5047e-05	0.00249754	0.105943	0.0367275	0	0.43586	0.24001	0.123484	0	0	0.944587	0.105943	0.123484	0.24001	49.6976	50.3024	50	50	57.1859	17.156	25.4311	99.773	57.316	17.1951	25.489	0.240556	0.123765	0.106184	0.470504	51.1272	26.3047	22.5681	0.225681		0.0777156	0.922284
20	041-c2-17	Widmanstätten	0	0.1284	11.8	2.27	0.0077	12.87	66.37	6.46	0	0	99.9062	0	0.00105453	0.0564646	0.0287487	0.000102774	0.414293	0.320319	0.0598879	0	0	0.88087	0.0564646	0.0598879	0.320319	49.5727	50.4273	50	50	76.3207	8.32042	13.5541	98.1952	77.7235	8.47335	13.8032	0.326206	0.0609886	0.0575024	0.444697	73.3547	13.7146	12.9307	0.129307		0.0648895	0.93511
28	041-c3-7	Widmanstätten	0.0237	0.0762	11.95	2.72	0.0075	12.5	64.76	6.04	0	0	98.0775	0.000185737	0.000625821	0.0571824	0.0344478	0.000100105	0.402382	0.312548	0.0559943	0	0	0.863467	0.0571824	0.0559943	0.312548	49.3042	50.6958	50	50	74.4693	7.77946	13.7264	95.9751	77.5923	8.1057	14.302	0.325655	0.0583425	0.0595804	0.443578	73.4155	13.1527	13.4318	0.134318		0.0788587	0.921141
29	041-c3-8	Widmanstätten	0.2172	0.0638	11.36	2.63	0	12.71	66.65	6.34	0	0	99.971	0.00170219	0.000523982	0.0543592	0.033308	0	0.409142	0.32167	0.0587754	0	0	0.879481	0.0543592	0.0587754	0.32167	49.4388	50.5612	50	50	76.6427	8.16586	13.0487	97.8572	78.3209	8.34467	13.3344	0.328714	0.0600624	0.0555495	0.444325	73.9804	13.5177	12.502	0.12502		0.0752808	0.924719
17	041SDP-c3-5	Widmanstätten	0	0.0936	29.33	6.61	0	12.24	35.37	16.1	0.0189	0	99.7626	0	0.000768725	0.140348	0.0837133	0	0.394013	0.170705	0.149256	0.000297422	0	0.939101	0.140348	0.149554	0.170705	49.0476	50.9524	50	50	40.6729	20.7366	33.6899	95.0995	42.7688	21.8052	35.426	0.179501	0.156947	0.14758	0.484029	37.0848	32.4252	30.49	0.3049		0.175233	0.824767
18	041SDP-c3-6	Widmanstätten	0.0312	0.1358	29.48	6.55	0	12.12	36.27	15.48	0.015	0	100.082	0.000244514	0.00111531	0.141066	0.0829534	0	0.39015	0.175048	0.143508	0.000236049	0	0.934322	0.141066	0.143745	0.175048	49.2185	50.7815	50	50	41.7079	19.9381	33.8622	95.5082	43.6694	20.8758	35.4548	0.183281	0.150258	0.1477	0.481239	38.0852	31.2231	30.6917	0.306917		0.175339	0.824661
19	041SDP-c3-7	Widmanstätten	0.1467	0	16.12	6.15	0	11.7	56.59	8.63	0.0127	0	99.3494	0.00114969	0	0.0771364	0.0778875	0	0.37663	0.273118	0.080005	0.000199855	0	0.886126	0.0771364	0.0802049	0.273118	48.5776	51.4224	50	50	65.0744	11.1154	18.5162	94.706	68.712	11.7367	19.5513	0.288385	0.0844773	0.0814483	0.45431	63.4775	18.5946	17.9279	0.179279		0.171363	0.828637
20	041SDP-c3-8	Widmanstätten	0.1654	0.0437	19	6.23	0	11.76	52.8	10.03	0	0	100.029	0.00129624	0.000358903	0.0909176	0.0789007	0	0.378561	0.254826	0.0929838	0	0	0.897845	0.0909176	0.0929838	0.254826	48.8645	51.1355	50	50	60.7162	12.9185	21.8244	95.4591	63.6044	13.5331	22.8625	0.266948	0.097407	0.0952425	0.459598	58.083	21.194	20.723	0.20723		0.172475	0.827525
21	041SDP-c3-9	Widmanstätten	0	0.0609	14.9	6.1	0.0145	11.48	58.84	8.09	0	0	99.4855	0	0.000500164	0.0712986	0.0772543	0.000193536	0.369548	0.283977	0.0749989	0	0	0.87777	0.0712986	0.0749989	0.283977	49.019	50.981	50	50	67.6617	10.4198	17.1149	95.1965	71.0759	10.9456	17.9785	0.298306	0.0787833	0.0748962	0.451986	65.999	17.4305	16.5705	0.165705		0.172905	0.827095
27	041SDP-c3-15	Widmanstätten	0.1019	0.2113	25.09	5.76	0	12.22	43.92	13.93	0.0005	0	101.234	0.000798589	0.00173538	0.120059	0.0729483	0	0.393369	0.211969	0.129139	7.86832e-06	0	0.930026	0.120059	0.129147	0.211969	49.5873	50.4127	50	50	50.5048	17.9417	28.8196	97.2662	51.9243	18.446	29.6297	0.217927	0.132769	0.123434	0.474129	45.9636	28.0027	26.0337	0.260337		0.156435	0.843565
28	041SDP-c3-16	Widmanstätten	0.1619	0.1866	24.47	5.81	0	12.14	43.74	13.69	0	0	100.198	0.00126881	0.00153252	0.117092	0.0735816	0	0.390793	0.2111	0.126914	0	0	0.922283	0.117092	0.126914	0.2111	49.3457	50.6543	50	50	50.2978	17.6326	28.1075	96.0379	52.3729	18.36	29.2671	0.219809	0.13215	0.121923	0.473883	46.3848	27.8867	25.7285	0.257285		0.158453	0.841547
29	041SDP-c3-17	Widmanstätten	0.0368	0.3159	26.28	5.76	0	12.19	40.19	15.22	0	0	99.9928	0.000288401	0.00259445	0.125753	0.0729483	0	0.392403	0.193967	0.141098	0	0	0.929053	0.125753	0.141098	0.193967	49.6009	50.3991	50	50	46.2156	19.6032	30.1865	96.0053	48.1386	20.4189	31.4426	0.202038	0.146969	0.130986	0.479993	42.0919	30.619	27.2891	0.272891		0.15676	0.84324
36	041SDP-c4-6	Widmanstätten	0.0946	0.2246	28.11	6.69	0	11.86	37	15.92	0.0503	0	99.9496	0.000741379	0.00184461	0.13451	0.0847264	0	0.38178	0.178571	0.147588	0.000791553	0	0.930553	0.13451	0.148379	0.178571	49.5899	50.4101	50	50	42.5473	20.5048	32.2886	95.3407	44.6266	21.5069	33.8665	0.187298	0.1548	0.141084	0.483182	38.7635	32.0376	29.1989	0.291989		0.181619	0.818381
37	041SDP-c4-7	Widmanstätten	0.0501	0.1419	27.51	6.89	0	11.73	39.1	15.61	0.0311	0	101.063	0.000392633	0.00116541	0.131639	0.0872594	0	0.377595	0.188707	0.144714	0.000489409	0	0.931962	0.131639	0.145203	0.188707	49.9536	50.0464	50	50	44.9622	20.1055	31.5994	96.6671	46.5124	20.7987	32.6889	0.195213	0.149703	0.136178	0.481094	40.5769	31.1172	28.3059	0.283059		0.187713	0.812287
38	041SDP-c4-8	Widmanstätten	0	0.0726	26.32	6.55	0	11.85	41.35	14.23	0.0142	0	100.387	0	0.000596255	0.125945	0.0829534	0	0.381458	0.199566	0.13192	0.00022346	0	0.922662	0.125945	0.132144	0.199566	49.6015	50.3985	50	50	47.5495	18.3281	30.2325	96.1101	49.474	19.0699	31.4561	0.207643	0.13726	0.131042	0.475945	43.6275	28.8394	27.5331	0.275331		0.17862	0.82138
39	041SDP-c4-9	Widmanstätten	0.0897	0.0917	27.92	6.86	0	11.94	39.21	15.7	0.0611	0	101.872	0.000702978	0.000753121	0.133601	0.0868794	0	0.384355	0.189237	0.145548	0.000961508	0	0.942039	0.133601	0.14651	0.189237	49.8226	50.1774	50	50	45.0887	20.2214	32.0703	97.3804	46.3016	20.7654	32.933	0.194328	0.149463	0.137195	0.480986	40.402	31.0743	28.5237	0.285237		0.184365	0.815635
43	041SDP-c4-13	Widmanstätten	0.0841	0.1675	10.52	2.72	0	13.62	67.8	6.22	0.0001	0	101.132	0.000659091	0.00137566	0.0503396	0.0344478	0	0.438436	0.32722	0.057663	1.57366e-06	0	0.910142	0.0503396	0.0576645	0.32722	47.8194	52.1806	50	50	77.9651	8.0113	12.0838	98.0602	79.5074	8.16978	12.3228	0.333693	0.0588036	0.0513355	0.443832	75.1845	13.2491	11.5664	0.115664		0.0728463	0.927154
77	041SDP-c6-5	Widmanstätten	0.0197	0.2136	16.18	2.82	0.0204	13.35	57.81	9.22	0.0317	0	99.6655	0.000154389	0.00175427	0.0774235	0.0357143	0.000272285	0.429744	0.279006	0.0854747	0.000498851	0	0.910042	0.0774235	0.0859735	0.279006	48.6134	51.3866	50	50	66.4773	11.8753	18.5852	96.9377	68.5773	12.2504	19.1723	0.28782	0.0881748	0.0798693	0.455864	63.1372	19.3424	17.5204	0.175204		0.0767293	0.923271
78	041SDP-c6-6	Widmanstätten	0.0819	0.1852	16.8	2.86	0	13.51	57.24	9.42	0.0071	0	100.104	0.00064185	0.00152102	0.0803903	0.0362209	0	0.434895	0.276255	0.0873288	0.00011173	0	0.917364	0.0803903	0.0874405	0.276255	48.4089	51.5911	50	50	65.8219	12.1329	19.2973	97.2521	67.6817	12.4757	19.8426	0.284061	0.0897964	0.0826618	0.456519	62.2232	19.6698	18.107	0.18107		0.0768832	0.923117
79	041SDP-c6-7	Widmanstätten	0	0.2769	16.22	2.87	0.0063	13.51	58.01	9.43	0	0	100.323	0	0.00227415	0.0776149	0.0363475	8.40879e-05	0.434895	0.279971	0.0874215	0	0	0.918608	0.0776149	0.0874215	0.279971	48.4437	51.5563	50	50	66.7073	12.1457	18.6311	97.4842	68.4289	12.4592	19.1119	0.287196	0.0896777	0.079618	0.456492	62.9138	19.645	17.4413	0.174413		0.0771313	0.922869
92	041SDP-c7-8	Widmanstätten	0.0513	0	12.59	3.07	0	12.6	64.53	6.62	0	0	99.4614	0.000402038	0	0.0602449	0.0388804	0	0.405601	0.311438	0.0613712	0	0	0.877938	0.0602449	0.0613712	0.311438	49.3263	50.6737	50	50	74.2048	8.5265	14.4615	97.1928	76.348	8.77276	14.8792	0.320433	0.0631437	0.0619849	0.445562	71.9167	14.1717	13.9116	0.139116		0.0874737	0.912526
102	041SDP-c8-7	Widmanstätten	0.0929	0.37	27.02	5.52	0	12.58	38.85	15.26	0	0	99.693	0.000728056	0.00303876	0.129294	0.0699088	0	0.404957	0.1875	0.141469	0	0	0.936896	0.129294	0.141469	0.1875	48.9129	51.0871	50	50	44.6747	19.6547	31.0365	95.366	46.8455	20.6098	32.5447	0.196611	0.148343	0.135577	0.480531	40.9153	30.8707	28.214	0.28214		0.147218	0.852782
103	041SDP-c8-8	Widmanstätten	0.0032	0.2833	27.17	5.52	0	12.67	38.63	15.48	0	0	99.7566	2.50784e-05	0.00232671	0.130012	0.0699088	0	0.407854	0.186438	0.143508	0	0	0.940074	0.130012	0.143508	0.186438	48.9279	51.0721	50	50	44.4217	19.9381	31.2088	95.5686	46.4815	20.8626	32.6559	0.195083	0.150163	0.136041	0.481287	40.5337	31.2003	28.266	0.28266		0.146325	0.853675
105	041SDP-c8-10	Widmanstätten	0.087	0.1975	29.06	5.61	0.0291	12.82	35.94	15.94	0.0129	0	99.6965	0.000681818	0.00162204	0.139056	0.0710486	0.000388406	0.412683	0.173456	0.147773	0.000203003	0	0.946912	0.139056	0.147976	0.173456	48.6305	51.3695	50	50	41.3284	20.5306	33.3798	95.2387	43.3945	21.5569	35.0485	0.182127	0.155161	0.146008	0.483296	37.6844	32.1047	30.2109	0.302109		0.146876	0.853124
113	041SDP-c8-18	Widmanstätten	0	0.3403	25.24	6.99	0	11.7	41.62	14.24	0	0	100.13	0	0.00279484	0.120777	0.0885258	0	0.37663	0.200869	0.132013	0	0	0.921609	0.120777	0.132013	0.200869	49.2246	50.7754	50	50	47.86	18.341	28.9919	95.1929	50.2768	19.2672	30.456	0.211012	0.138679	0.126876	0.476568	44.2775	29.0996	26.6229	0.266229		0.190315	0.809685
114	041SDP-c8-19	Widmanstätten	0	0.3381	27.71	7.04	0	11.85	39.19	15.62	0	0.0933	101.841	0	0.00277677	0.132596	0.0891591	0	0.381458	0.189141	0.144806	0	0.000473684	0.940411	0.132596	0.144806	0.189141	49.6609	50.3391	50	50	45.0657	20.1184	31.8291	97.0132	46.4531	20.7378	32.809	0.194964	0.149265	0.136679	0.480907	40.5409	31.0381	28.421	0.28421		0.189451	0.810549
115	041SDP-c8-20	Widmanstätten	0.0538	0.1734	29.26	3.91	0	13.59	37.1	16.64	0	0	100.727	0.00042163	0.00142411	0.140013	0.0495187	0	0.43747	0.179054	0.154262	0	0	0.962164	0.140013	0.154262	0.179054	49.1943	50.8057	50	50	42.6623	21.4322	33.6095	97.704	43.6649	21.9358	34.3993	0.183262	0.157887	0.143303	0.484453	37.8286	32.5909	29.5805	0.295805		0.101684	0.898316
116	041SDP-c8-21	Widmanstätten	0	0.1513	24.98	6.51	0	11.93	42.5	13.95	0	0	100.021	0	0.00124261	0.119533	0.0824468	0	0.384033	0.205116	0.129324	0	0	0.921696	0.119533	0.129324	0.205116	49.2541	50.7459	50	50	48.8719	17.9675	28.6933	95.5327	51.1573	18.8077	30.035	0.214708	0.135372	0.125122	0.475202	45.1824	28.4873	26.3304	0.263304		0.176742	0.823258
		Average S.D. (%)			3.86	3.53		1.78	2.24	2.48
		Average DL (ppm)	1464	1359	3098	731	1593	290	1747	623	752	2442
24	041-c3-3	Pb-Bi sulfosalts	0	2.61	38.11	3.54	0	14.88	27.95	13.36	0	0	100.45	0	0.0214356	0.182362	0.0448328	0	0.478996	0.134894	0.123855	0	0	0.986374	0.182362	0.123855	0.134894	44.7204	55.2796	48	52	32.1405	17.2076	43.7751	93.1231	34.514	18.4783	47.0077	0.144855	0.133001	0.195829	0.473685	30.5805	28.078	41.3415	2.03369	0.239049	0.499974	5.34174
33	041-c3-12	Pb-Bi sulfosalts	0	2.64	39.66	3.36	0	14.61	24.99	13.07	0.0185	0.0035	98.3521	0	0.021682	0.189779	0.0425532	0	0.470304	0.120608	0.121166	0.000291128	1.77695e-05	0.966401	0.189779	0.121458	0.120608	44.6876	55.3124	48	52	28.7367	16.834	45.5555	91.1262	31.535	18.4733	49.9916	0.132353	0.132965	0.208259	0.473577	27.9475	28.0768	43.9757	2.16014	0.246794	0.484359	5.35321
46	041-c4-9	Pb-Bi sulfosalts	0.0276	1.86	42.29	4.49	0	14.63	24.14	13.05	0.0963	0.9597	101.544	0.000216301	0.015276	0.202363	0.0568642	0	0.470948	0.116506	0.120981	0.00151544	0.0048724	0.989543	0.202363	0.122496	0.116506	45.0954	54.9046	48	52	27.7593	16.8083	48.5764	93.1439	29.8025	18.0455	52.152	0.125081	0.129886	0.217259	0.472226	26.4876	27.505	46.0074	2.24952	0.169811	0.632117	5.23517
47	041-c4-10	Pb-Bi sulfosalts	0.014	1.85	41.45	4.57	0	14.08	24.96	12.57	0.075	0.5201	100.089	0.000109718	0.0151938	0.198344	0.0578774	0	0.453243	0.120463	0.116531	0.00118025	0.00264055	0.965583	0.198344	0.117711	0.120463	45.4812	54.5188	48	52	28.7022	16.19	47.6116	92.5038	31.0281	17.502	51.4698	0.130225	0.125974	0.214417	0.470617	27.6712	26.7679	45.5609	2.25955	0.173089	0.659344	5.16338
51	041-c4-14	Pb-Bi sulfosalts	0.0082	1.78	40.86	4.42	0	14.07	25.35	13.1	0.0786	0	99.6668	6.42633e-05	0.0146189	0.195521	0.0559777	0	0.452921	0.122346	0.121445	0.0012369	0	0.96413	0.195521	0.122681	0.122346	45.6938	54.3062	48	52	29.1507	16.8727	46.9339	92.9572	31.3592	18.151	50.4897	0.131615	0.130646	0.210334	0.472595	27.8494	27.6443	44.5062	2.23075	0.166791	0.638664	5.16749
52	041-c4-15	Pb-Bi sulfosalts	0.0086	1.72	40.36	4.35	0	14.1	25.14	12.76	0.0567	0.234	98.7294	6.73981e-05	0.0141261	0.193128	0.0550912	0	0.453887	0.121332	0.118293	0.000892267	0.00118802	0.958005	0.193128	0.119185	0.121332	45.3894	54.6106	48	52	28.9092	16.4348	46.3595	91.7035	31.5246	17.9216	50.5537	0.132309	0.128995	0.210601	0.471904	28.0373	27.3349	44.6278	2.21754	0.162199	0.632568	5.21162
53	041-c4-16	Pb-Bi sulfosalts	0	1.95	41.49	4.59	0	14.36	22.68	14.95	0.0817	0.5348	100.636	0	0.0160151	0.198535	0.0581307	0	0.462257	0.109459	0.138595	0.00128568	0.00271518	0.986993	0.198535	0.139881	0.109459	45.6529	54.3471	48	52	26.0804	19.2555	47.6575	92.9933	28.0454	20.7063	51.2483	0.117707	0.149038	0.213494	0.480239	24.5101	31.0341	44.4559	2.21267	0.178488	0.647864	5.15183
54	041-c4-17	Pb-Bi sulfosalts	0	1.62	39.63	4.3	0	14.07	27.01	13.95	0.0843	0	100.664	0	0.0133049	0.189635	0.054458	0	0.452921	0.130357	0.129324	0.0013266	0	0.971327	0.189635	0.130651	0.130357	46.3946	53.6054	48	52	31.0595	17.9675	45.521	94.548	32.8505	19.0035	48.1459	0.137874	0.136782	0.20057	0.475226	29.0123	28.7825	42.2052	2.14756	0.150674	0.61672	5.1292
75	041-c6-11	Pb-Bi sulfosalts	0.0066	2.1	40.35	5.42	0	13.87	24.23	13.94	0.094	0.1368	100.147	5.17241e-05	0.017247	0.19308	0.0686424	0	0.446483	0.11694	0.129232	0.00147924	0.000694534	0.97385	0.19308	0.130711	0.11694	45.3279	54.6721	48	52	27.8627	17.9546	46.348	92.1654	30.2313	19.4808	50.2879	0.126881	0.140217	0.209493	0.476591	26.6226	29.4209	43.9566	2.18091	0.194812	0.775341	5.04319
76	041-c6-12	Pb-Bi sulfosalts	0	2.08	40.45	5.68	0	13.63	24.46	13.91	0.1103	0.0924	100.413	0	0.0170828	0.193559	0.0719352	0	0.438757	0.11805	0.128954	0.00173575	0.000469115	0.970543	0.193559	0.130689	0.11805	45.6206	54.3794	48	52	28.1272	17.9159	46.4629	92.5061	30.4058	19.3673	50.2269	0.127613	0.1394	0.209239	0.476253	26.7953	29.2702	43.9345	2.19377	0.193614	0.815303	4.97282
77	041-c6-13	Pb-Bi sulfosalts	0	1.65	37.87	5.42	0	13.64	24.41	14.87	0.1022	1.8	99.7623	0	0.0135512	0.181213	0.0686424	0	0.439079	0.117809	0.137853	0.00160828	0.00913861	0.968895	0.181213	0.139462	0.117809	46.1992	53.8008	48	52	28.0697	19.1524	43.4994	90.7215	30.9405	21.1112	47.9482	0.129858	0.151952	0.199747	0.481557	26.9662	31.5544	41.4794	2.05734	0.153849	0.779306	4.98493
78	041-c6-14	Pb-Bi sulfosalts	0	2.08	39.78	5.43	0	13.76	24.46	13.87	0.1001	0.1681	99.6483	0	0.0170828	0.190353	0.068769	0	0.442942	0.11805	0.128583	0.00157524	0.000853444	0.968208	0.190353	0.130158	0.11805	45.3843	54.6157	48	52	28.1272	17.8644	45.6933	91.685	30.6781	19.4846	49.8373	0.128756	0.140244	0.207616	0.476617	27.0147	29.4249	43.5604	2.16263	0.194081	0.781298	5.03235
54	041SDP-c4-24	Pb-Bi sulfosalts	0.0091	3.18	39.61	4.4	0	14.76	25.02	12.88	0.0239	0.029	99.912	7.13166e-05	0.026117	0.189539	0.0557244	0	0.475133	0.120753	0.119405	0.000376105	0.000147233	0.987266	0.189539	0.119781	0.120753	43.577	56.423	48	52	28.7712	16.5893	45.498	90.8585	31.6659	18.2584	50.0757	0.132902	0.131419	0.208609	0.47293	28.1019	27.7882	44.11	2.11182	0.290992	0.620875	5.29387
55	041SDP-c4-25	Pb-Bi sulfosalts	0	3.16	40	4.46	0	14.68	24.82	13.09	0.0138	0.0319	100.256	0	0.0259527	0.191406	0.0564843	0	0.472558	0.119788	0.121352	0.000217166	0.000161956	0.987919	0.191406	0.121569	0.119788	43.8218	56.1782	48	52	28.5412	16.8598	45.946	91.347	31.2448	18.4569	50.2983	0.131135	0.132847	0.209537	0.473518	27.6937	28.0553	44.251	2.13121	0.288971	0.628926	5.2617
56	041SDP-c4-26	Pb-Bi sulfosalts	0	3.06	39.62	4.49	0	14.52	25.41	13.47	0.0252	0	100.595	0	0.0251314	0.189587	0.0568642	0	0.467407	0.122635	0.124875	0.000396563	0	0.986896	0.189587	0.125271	0.122635	44.3302	55.6698	48	52	29.2197	17.3492	45.5095	92.0784	31.7335	18.8418	49.4247	0.133186	0.135618	0.205898	0.474701	28.0567	28.5691	43.3742	2.11315	0.280116	0.633812	5.20975
57	041SDP-c4-27	Pb-Bi sulfosalts	0	3.17	38.84	4.47	0	14.7	25.16	13.64	0.0398	0.0178	100.038	0	0.0260348	0.185855	0.0566109	0	0.473201	0.121429	0.126451	0.000626318	9.03707e-05	0.990298	0.185855	0.127077	0.121429	43.8707	56.1293	48	52	28.9322	17.5682	44.6136	91.1139	31.7538	19.2816	48.9646	0.133271	0.138783	0.203981	0.476035	27.9961	29.154	42.8499	2.06443	0.289189	0.628821	5.25621
65	041SDP-c5-7	Pb-Bi sulfosalts	0	3.38	39.53	3.07	0.0024	15.44	24.9	12.89	0.0237	0	99.2361	0	0.0277595	0.189156	0.0388804	3.20335e-05	0.497022	0.120174	0.119498	0.000372958	0	0.992895	0.189156	0.119871	0.120174	43.2272	56.7728	48	52	28.6332	16.6022	45.4061	90.6415	31.5895	18.3163	50.0942	0.132581	0.131835	0.208686	0.473103	28.0238	27.8661	44.1101	2.09561	0.30754	0.430745	5.50637
66	041SDP-c5-8	Pb-Bi sulfosalts	0	3.75	41.04	2.92	0	14.71	23.9	12.03	0	0.1627	98.5127	0	0.0307983	0.196382	0.0369807	0	0.473523	0.115347	0.111525	0	0.000826028	0.965383	0.196382	0.111525	0.115347	43.9287	56.0713	48	52	27.4833	15.4945	47.1406	90.1184	30.4968	17.1935	52.3096	0.127995	0.123754	0.217916	0.469665	27.2525	26.3494	46.3981	2.23766	0.350929	0.421375	5.39553
68	041SDP-c5-10	Pb-Bi sulfosalts	0.0507	3.69	38.39	2.91	0.0123	15.46	24.57	12.86	0.0103	3.15	101.103	0.000397335	0.0303055	0.183701	0.0368541	0.000164172	0.497666	0.118581	0.11922	0.000162087	0.0159926	1.00304	0.183701	0.119382	0.118581	43.6329	56.3671	48	52	28.2537	16.5636	44.0967	88.914	31.7765	18.6287	49.5948	0.133366	0.134084	0.206606	0.474056	28.133	28.2845	43.5826	2.01458	0.332349	0.404165	5.45771
69	041SDP-c5-11	Pb-Bi sulfosalts	0	5.86	43.27	2.98	0	16.38	20.63	10.39	0.007	0	99.5171	0	0.0481275	0.207053	0.0377406	0	0.527282	0.0995656	0.0963213	0.000110156	0	1.0162	0.207053	0.0964314	0.0995656	39.6625	60.3375	48	52	23.723	13.3822	49.7021	86.8073	27.3283	15.416	57.2557	0.114697	0.11096	0.23852	0.464177	24.7098	23.9046	51.3856	2.24127	0.520963	0.408529	5.70764
70	041SDP-c5-12	Pb-Bi sulfosalts	0	5.86	44.24	2.8	0	16.78	20.57	11.08	0	0	101.33	0	0.0481275	0.211694	0.035461	0	0.540158	0.0992761	0.102718	0	0	1.03743	0.211694	0.102718	0.0992761	39.8761	60.1239	48	52	23.654	14.2709	50.8163	88.7412	26.655	16.0815	57.2634	0.111871	0.11575	0.238553	0.466174	23.9978	24.8298	51.1724	2.24461	0.510299	0.375996	5.72733
86	041SDP-c7-2	Pb-Bi sulfosalts	0	2.99	39.58	3.42	0	15.25	25.1	13.64	0.0292	0	100.009	0	0.0245565	0.189396	0.0433131	0	0.490906	0.121139	0.126451	0.00045951	0	0.996221	0.189396	0.12691	0.121139	43.9104	56.0896	48	52	28.8632	17.5682	45.4636	91.895	31.4089	19.1177	49.4734	0.131823	0.137603	0.2061	0.475527	27.7215	28.937	43.3414	2.09126	0.271146	0.478251	5.42045
87	041SDP-c7-3	Pb-Bi sulfosalts	0	2.65	40.85	3.44	0	14.97	25.09	13.25	0	0	100.25	0	0.0217641	0.195473	0.0435664	0	0.481893	0.121091	0.122835	0	0	0.986622	0.195473	0.122835	0.121091	44.5357	55.4643	48	52	28.8517	17.0659	46.9224	92.8399	31.0768	18.382	50.5412	0.13043	0.132308	0.210548	0.473286	27.5583	27.9553	44.4864	2.17936	0.242652	0.485728	5.3727
88	041SDP-c7-4	Pb-Bi sulfosalts	0	2.39	41.51	3.44	0	14.99	24.84	13.33	0.0348	0	100.535	0	0.0196288	0.198631	0.0435664	0	0.482537	0.119884	0.123577	0.000547635	0	0.988371	0.198631	0.124124	0.119884	44.7847	55.2153	48	52	28.5642	17.1689	47.6805	93.4136	30.5782	18.3795	51.0423	0.128337	0.13229	0.212636	0.473263	27.1175	27.9527	44.9298	2.21065	0.218457	0.484868	5.37035
89	041SDP-c7-5	Pb-Bi sulfosalts	0	2.66	40.35	3.55	0	14.9	25.08	13.78	0.0355	0	100.355	0	0.0218463	0.19308	0.0449595	0	0.479639	0.121042	0.127748	0.00055865	0	0.988875	0.19308	0.128307	0.121042	44.7407	55.2593	48	52	28.8402	17.7485	46.348	92.9367	31.0321	19.0974	49.8705	0.130242	0.137457	0.207755	0.475454	27.3932	28.9108	43.6961	2.14778	0.243012	0.500118	5.33539
91	041SDP-c7-7	Pb-Bi sulfosalts	0	3.33	39.98	3.71	0	15.34	25.33	13.71	0.0421	0.0621	101.504	0	0.0273489	0.19131	0.0469858	0	0.493803	0.122249	0.1271	0.000662512	0.000315282	1.00977	0.19131	0.127762	0.122249	43.7361	56.2639	48	52	29.1277	17.6583	45.923	92.7091	31.4184	19.0471	49.5346	0.131863	0.137095	0.206355	0.475313	27.7424	28.8431	43.4145	2.08404	0.297926	0.511841	5.37926
100	041SDP-c8-5	Pb-Bi sulfosalts	0	2.51	40.4	5.03	0	13.97	23.37	13.55	0.045	0	98.8751	0	0.0206143	0.19332	0.0637031	0	0.449702	0.11279	0.125616	0.000708148	0	0.966453	0.19332	0.126324	0.11279	44.7444	55.2556	48	52	26.8738	17.4523	46.4055	90.7315	29.619	19.2351	51.1459	0.124311	0.138448	0.213068	0.475827	26.1253	29.0963	44.7784	2.20033	0.234629	0.725058	5.11843
101	041SDP-c8-6	Pb-Bi sulfosalts	0	2.55	39.87	4.87	0	13.99	23.62	13.08	0.065	0	98.0451	0	0.0209428	0.190783	0.0616768	0	0.450346	0.113996	0.121259	0.00102288	0	0.960027	0.190783	0.122282	0.113996	44.4843	55.5157	48	52	27.1613	16.8469	45.7967	89.8049	30.2448	18.7595	50.9958	0.126938	0.135025	0.212442	0.474405	26.7572	28.462	44.7808	2.186	0.239963	0.706693	5.16007
		Average S.D. (%)		9.02	2.99	5.07		1.57	2.93	2.51
		Average DL (ppm)	1430	1335	3082	665	1434	277	1583	616	743	2389
*As in Buzatu, A., Damian, G., Dill, H.G., Buzgar, N., and Apopei, A.I. (2015) Mineralogy and geochemistry of sulfosalts from Baia Sprie ore deposit (Romania) - New bismuth minerals occurrence. Ore Geology Reviews, 65, 132–147. https://doi.org/10.1016/j.oregeorev.2014.09.016
[truncated: 20 more columns]

## Sheet: Electrum
Macro-to-nanoscale investigation unlocks gold and silver enrichment by lead-bismuth metallic melts in the Switchback epithermal deposit, southern Mexico
Néstor Cano 1,*, José María González-Jiménez 2, Antoni Camprubí 3, Joaquín A. Proenza 4
1Programa de Posgrado en Ciencias de la Tierra, Universidad Nacional Autónoma de México. Ciudad Universitaria, 04510 Coyoacán, CDMX, Mexico
2Instituto Andaluz de Ciencias de la Tierra (IACT), Consejo Superior de Investigaciones Científicas (CSIC), Avda. de las Palmeras 4, 18100 Armilla, Granada, Spain
3Instituto de Geología, Universidad Nacional Autónoma de México. Ciudad Universitaria, 04510 Coyoacán, CDMX, Mexico
4Departament de Mineralogia, Petrologia i Geologia Aplicada, Facultat de Ciències de la Terra, Universitat de Barcelona, Martí i Franquès s/n, 08028 Barcelona, Spain
5Instituto de Geociencias, Universidad Nacional Autónoma de México. Blvd. Juriquilla 3001, 76230 Juriquilla, Qro., Mexico
American Mineralogist: April 2025 Online Materials AM-25-49388
*nacanoh@comunidad.unam.mx
Supplementary Table S1. EPMA standards and results.
			wt.%											at%		Ratio		Masses
No.	Spot	Mineral	Te	Sb	Bi	Se	As	S	Pb	Ag	Cu	Au	Total	Ag	Au	Au/Ag		Ag	107.868
36	041-c3-15	Electrum	0.1926	0	0.5256	0	0	0	0	32.48	0	67.96	101.158	0.301108	0.345033	1.14588		Au	196.967
37	041-c3-16	Electrum	0.1963	0.0541	0.5798	0.0103	0.0861	0	0	32.32	0	68.09	101.337	0.299625	0.345693	1.15375
55	041-c4-18	Electrum	0.0621	0	0.4971	0.0222	0.0385	0	0	24.75	0.0269	74.39	99.7868	0.229447	0.377678	1.64604
56	041-c4-19	Electrum	0.0405	0.0798	0.2053	0	0.101	0.0093	0	24.8	0.0216	74.95	100.207	0.22991	0.380521	1.65509
79	041-c6-15	Electrum	0	0	0.2366	0.0075	0	0	0	28.61	0.0204	71.46	100.334	0.265231	0.362803	1.36787
58	041SDP-c4-28	Electrum	0	0	0.1462	0.015	0	0.0137	0	33.97	0	67.4	101.545	0.314921	0.34219	1.08659
71	041SDP-c5-13	Electrum	0	0	0.2724	0	0.0771	0.152	0	29.26	0	71.29	101.051	0.271257	0.36194	1.33431
72	041SDP-c5-14	Electrum	0	0	0.278	0.0188	0.0234	0.1018	0	31.42	0	67.1	98.9421	0.291281	0.340667	1.16955
106	041SDP-c8-11	Electrum	0	0.1147	0.3714	0	0.0447	0.0921	0	26.78	0.0158	74.08	101.499	0.248266	0.376104	1.51493
107	041SDP-c8-12	Electrum	0	0.0275	0.264	0.0123	0.0626	0.0493	0	31.19	0.0084	70.2	101.814	0.289149	0.356406	1.2326
124	041SDP-c9-8	Electrum	0.2084	0	0.3425	0.0267	0	0.0937	0	36.37	0.0685	63.52	100.63	0.337171	0.322491	0.956463
125	041SDP-c9-9	Electrum	0.1374	0.0254	0.4143	0.0078	0	0.0999	0	34.09	0.1	66.76	101.635	0.316034	0.338941	1.07248
		Average S.D. (%)								1.85		1.06
		Average DL (ppm)	1492	1424	2980	760	1467	239	1312	637	818	2724
