# Supplementary material for: Macro- to nanoscale investigation unlocks gold and silver enrichment by lead-bismuth metallic melts in the Switchback epithermal deposit, southern Mexico
Source: publisher site journal article supplement (doi:10.2138/am-2024-9388), 2024-07-19
Supplement: Supplementary file 2 [file 9388_suppS2.xlsx]

## Sheet: Supplementary Table S2_EPMA met
Macro-to-nanoscale investigation unlocks gold and silver enrichment by lead-bismuth metallic melts in the Switchback epithermal deposit, southern Mexico
Néstor Cano 1,*, José María González-Jiménez 2, Antoni Camprubí 3, Joaquín A. Proenza 4
1Programa de Posgrado en Ciencias de la Tierra, Universidad Nacional Autónoma de México. Ciudad Universitaria, 04510 Coyoacán, CDMX, Mexico
2Instituto Andaluz de Ciencias de la Tierra (IACT), Consejo Superior de Investigaciones Científicas (CSIC), Avda. de las Palmeras 4, 18100 Armilla, Granada, Spain
3Instituto de Geología, Universidad Nacional Autónoma de México. Ciudad Universitaria, 04510 Coyoacán, CDMX, Mexico
4Departament de Mineralogia, Petrologia i Geologia Aplicada, Facultat de Ciències de la Terra, Universitat de Barcelona, Martí i Franquès s/n, 08028 Barcelona, Spain
5Instituto de Geociencias, Universidad Nacional Autónoma de México. Blvd. Juriquilla 3001, 76230 Juriquilla, Qro., Mexico
American Mineralogist: April 2025 Online Materials AM-25-49388
*nacanoh@comunidad.unam.mx
Supplementary Table S2. EPMA metadata. Spot ID as in Table S1.
Intensity & Wt. % Group : calib Sample : calib_0029_QNT Page 1
Unknown Specimen No. 1
Path : 0213 Project : calib_0029
Position No. : 1 spot ID : 041-c1-1
Stage : X= 20.8043 Y= 29.7502 Z= 11.4860
Acc. Voltage : 20.0 (kV) Probe Dia. : 5.0 Scan : Off
Dated on 2024/02/14 13:56:55
WDS only No. of accumulation : 1
Curr.(A) : 9.724E-009
Element Peak(mm) Net(cps) Bg- Bg+ S.D.(%) D.L.(ppm) K-raw(%)
1 Te 104.924 1.7 64.8 52.9 434.76 ? 1423 0.033
2 Sb 109.786 2.6 48.1 50.9 265.80 ? 1326 0.051
3 Bi 163.785 60.6 27.8 21.9 11.60 3360 4.388
4 Se 97.689 77.8 20.4 16.4 9.24 711 2.728
5 As 102.320 -1.2 18.6 14.4 300.00 ? 1512 0.000
6 S 172.119 1557.5 22.1 11.1 1.72 309 95.529
7 Pb 169.322 1725.3 29.1 9.1 1.64 2067 89.674
8 Ag 133.118 115.5 28.8 19.5 7.40 638 1.846
9 Cu 107.018 -3.9 231.5 181.5 300.00 ? 798 0.000
10 Au 88.552 -15.0 321.1 316.6 300.00 ? 2577 0.000
Element f(chi) If/Ip abs-el 1/s-el r-el c/k-el c/k-std
Te 0.6013 0.0000 0.7147 1.0540 0.9408 1.4112 1.4112
Sb 0.5710 0.0000 0.6846 1.0896 0.9365 1.4314 1.4314
Bi 0.7268 0.0000 1.0442 0.8971 1.0496 1.0171 1.0171
Se 0.4136 0.0021 0.6365 1.2735 0.8514 1.4460 0.9388
S 0.6949 0.0005 0.7783 1.7861 0.7634 0.9418 1.0118
Pb 0.7120 0.0000 1.0349 0.8967 1.0461 1.0301 1.0116
Ag 0.4911 0.0000 0.6171 1.1629 0.9188 1.5166 1.3985
Element El. mass% Norm El% At prop k-value k-(std)
Te 0.0471 0.0473 0.0438 0.000334 0.000334 ?
Sb 0.0726 0.0728 0.0707 0.000507 0.000507
Bi 4.46 4.48 2.533 0.04388 0.04388
Se 1.30 1.30 1.954 0.00899 0.02728
As 0.00 0.00 0.000 0.00000 0.00000 ?
S 12.95 12.99 47.928 0.13752 0.95529
Pb 78.59 78.85 44.998 0.76263 0.89674
Ag 2.25 2.26 2.472 0.01482 0.01846
Cu 0.00 0.00 0.000 0.00000 0.00000 ?
Au 0.00 0.00 0.000 0.00000 -0.00228 ?
-----------------------------------------------------------------------------
Total: 99.67 100.00 100.000
_x000C_
Intensity & Wt. % Group : calib Sample : calib_0029_QNT Page 2
Unknown Specimen No. 2
Path : 0213 Project : calib_0029
Position No. : 2 spot ID : 041-c1-2
Stage : X= 20.7835 Y= 29.7698 Z= 11.4865
Acc. Voltage : 20.0 (kV) Probe Dia. : 5.0 Scan : Off
Dated on 2024/02/14 13:59:42
WDS only No. of accumulation : 1
Curr.(A) : 9.722E-009
Element Peak(mm) Net(cps) Bg- Bg+ S.D.(%) D.L.(ppm) K-raw(%)
1 Te 104.924 3.5 65.0 53.9 219.64 ? 1430 0.067
2 Sb 109.786 -0.5 53.4 48.9 300.00 ? 1343 0.000
3 Bi 163.785 59.1 26.8 24.0 11.95 3432 4.282
4 Se 97.689 85.8 20.6 13.3 8.49 669 3.009
5 As 102.320 0.7 16.6 13.8 572.73 ? 1444 0.057
6 S 172.119 1573.3 25.1 9.7 1.71 313 96.520
7 Pb 169.322 1694.8 26.1 9.8 1.65 1979 88.105
8 Ag 133.118 116.4 29.1 21.4 7.42 655 1.861
9 Cu 107.018 -0.6 228.1 180.1 300.00 ? 794 0.000
10 Au 88.552 -14.2 324.9 331.3 300.00 ? 2602 0.000
Element f(chi) If/Ip abs-el 1/s-el r-el c/k-el c/k-std
Te 0.6021 0.0000 0.7156 1.0511 0.9418 1.4117 1.4117
Bi 0.7269 0.0000 1.0443 0.8946 1.0508 1.0186 1.0186
Se 0.4145 0.0021 0.6379 1.2698 0.8525 1.4451 0.9382
As 0.3710 0.0019 0.5911 1.3111 0.8466 1.5214 0.9131
S 0.6950 0.0005 0.7784 1.7810 0.7644 0.9432 1.0133
Pb 0.7121 0.0000 1.0351 0.8941 1.0473 1.0317 1.0131
Ag 0.4919 0.0000 0.6180 1.1597 0.9199 1.5169 1.3988
Element El. mass% Norm El% At prop k-value k-(std)
Te 0.0944 0.0957 0.0878 0.000669 0.000669
Sb 0.00 0.00 0.000 0.00000 0.00000 ?
Bi 4.36 4.42 2.474 0.04282 0.04282
Se 1.43 1.45 2.152 0.00992 0.03009
As 0.0239 0.0242 0.0378 0.000157 0.000569 ?
S 13.10 13.28 48.461 0.13895 0.96520
Pb 77.41 78.43 44.296 0.74929 0.88105
Ag 2.27 2.30 2.491 0.01494 0.01861
Cu 0.00 0.00 0.000 0.00000 0.00000 ?
Au 0.00 0.00 0.000 0.00000 -0.00215 ?
-----------------------------------------------------------------------------
Total: 98.70 100.00 100.000
_x000C_
Intensity & Wt. % Group : calib Sample : calib_0029_QNT Page 3
Unknown Specimen No. 3
Path : 0213 Project : calib_0029
Position No. : 3 spot ID : 041-c1-3
Stage : X= 20.7799 Y= 29.8064 Z= 11.4865
Acc. Voltage : 20.0 (kV) Probe Dia. : 5.0 Scan : Off
Dated on 2024/02/14 14:02:29
WDS only No. of accumulation : 1
Curr.(A) : 9.720E-009
Element Peak(mm) Net(cps) Bg- Bg+ S.D.(%) D.L.(ppm) K-raw(%)
1 Te 104.924 -1.6 62.2 60.4 300.00 ? 1442 0.000
2 Sb 109.786 -4.9 56.0 53.5 300.00 ? 1391 0.000
3 Bi 163.785 65.6 21.7 23.3 10.90 3277 4.747
4 Se 97.689 108.5 21.2 18.2 7.54 740 3.805
5 As 102.320 -0.3 17.2 13.6 300.00 ? 1459 0.000
6 S 172.119 1532.8 24.5 10.6 1.73 316 94.051
7 Pb 169.322 1714.2 26.2 9.4 1.64 1978 89.133
8 Ag 133.118 120.9 29.6 21.6 7.25 659 1.934
9 Cu 107.018 -4.7 222.0 179.6 300.00 ? 789 0.000
10 Au 88.552 -14.7 327.8 323.0 300.00 ? 2604 0.000
Element f(chi) If/Ip abs-el 1/s-el r-el c/k-el c/k-std
Bi 0.7248 0.0000 1.0414 0.8970 1.0499 1.0196 1.0196
Se 0.4142 0.0021 0.6373 1.2733 0.8517 1.4439 0.9374
S 0.6928 0.0005 0.7759 1.7859 0.7637 0.9446 1.0148
Pb 0.7100 0.0000 1.0320 0.8966 1.0464 1.0329 1.0144
Ag 0.4914 0.0000 0.6174 1.1628 0.9191 1.5156 1.3976
Element El. mass% Norm El% At prop k-value k-(std)
Te 0.00 0.00 0.000 0.00000 0.00000 ?
Sb 0.00 0.00 0.000 0.00000 0.00000 ?
Bi 4.84 4.84 2.742 0.04747 0.04747
Se 1.81 1.81 2.716 0.01255 0.03805
As 0.00 0.00 0.000 0.00000 0.00000 ?
S 12.79 12.78 47.227 0.13540 0.94051
Pb 78.29 78.22 44.733 0.75803 0.89133
Ag 2.35 2.35 2.582 0.01553 0.01934
Cu 0.00 0.00 0.000 0.00000 0.00000 ?
Au 0.00 0.00 0.000 0.00000 -0.00223 ?
-----------------------------------------------------------------------------
Total: 100.09 100.00 100.000
_x000C_
Intensity & Wt. % Group : calib Sample : calib_0029_QNT Page 4
Unknown Specimen No. 4
Path : 0213 Project : calib_0029
Position No. : 4 spot ID : 041-c2-1
Stage : X= 24.1731 Y= 32.7568 Z= 11.5655
Acc. Voltage : 20.0 (kV) Probe Dia. : 0.0 Scan : Off
Dated on 2024/02/14 14:05:16
WDS only No. of accumulation : 1
Curr.(A) : 9.717E-009
Element Peak(mm) Net(cps) Bg- Bg+ S.D.(%) D.L.(ppm) K-raw(%)
1 Te 104.924 -4.8 59.0 66.1 300.00 ? 1447 0.000
2 Sb 109.786 0.4 53.6 50.0 1568.43 ? 1353 0.009
3 Bi 163.785 94.6 26.8 22.9 8.53 3384 6.854
4 Se 97.689 146.0 22.6 15.6 6.21 715 5.121
5 As 102.320 -1.8 18.1 14.3 300.00 ? 1497 0.000
6 S 172.119 1502.3 25.1 10.4 1.75 317 92.212
7 Pb 169.322 1626.7 22.7 11.4 1.69 1887 84.612
8 Ag 133.118 194.1 26.9 20.1 5.36 633 3.104
9 Cu 107.018 -11.2 219.9 186.6 300.00 ? 798 0.000
10 Au 88.552 -12.1 323.4 309.3 300.00 ? 2579 0.000
Element f(chi) If/Ip abs-el 1/s-el r-el c/k-el c/k-std
Sb 0.5723 0.0000 0.6862 1.0851 0.9388 1.4307 1.4307
Bi 0.7222 0.0000 1.0376 0.8934 1.0522 1.0252 1.0252
Se 0.4136 0.0020 0.6364 1.2681 0.8536 1.4486 0.9405
S 0.6898 0.0008 0.7726 1.7787 0.7654 0.9501 1.0207
Pb 0.7072 0.0000 1.0279 0.8929 1.0487 1.0389 1.0203
Ag 0.4949 0.0000 0.6218 1.1581 0.9211 1.5078 1.3904
Element El. mass% Norm El% At prop k-value k-(std)
Te 0.00 0.00 0.000 0.00000 0.00000 ?
Sb 0.0124 0.0124 0.0120 0.000087 0.000087 ?
Bi 7.03 6.99 3.939 0.06854 0.06854
Se 2.45 2.43 3.629 0.01688 0.05121
As 0.00 0.00 0.000 0.00000 0.00000 ?
S 12.61 12.54 46.093 0.13275 0.92212
Pb 74.71 74.29 42.247 0.71958 0.84612
Ag 3.76 3.74 4.080 0.02492 0.03104
Cu 0.00 0.00 0.000 0.00000 0.00000 ?
Au 0.00 0.00 0.000 0.00000 -0.00183 ?
-----------------------------------------------------------------------------
Total: 100.57 100.00 100.000
_x000C_
Intensity & Wt. % Group : calib Sample : calib_0029_QNT Page 5
Unknown Specimen No. 5
Path : 0213 Project : calib_0029
Position No. : 5 spot ID : 041-c2-2
Stage : X= 24.1815 Y= 32.7664 Z= 11.5655
Acc. Voltage : 20.0 (kV) Probe Dia. : 0.0 Scan : Off
Dated on 2024/02/14 14:08:03
WDS only No. of accumulation : 1
Curr.(A) : 9.717E-009
Element Peak(mm) Net(cps) Bg- Bg+ S.D.(%) D.L.(ppm) K-raw(%)
1 Te 104.924 -3.9 64.8 67.6 300.00 ? 1494 0.000
2 Sb 109.786 1.5 53.3 53.1 462.49 ? 1373 0.030
3 Bi 163.785 88.3 25.0 22.7 8.90 3331 6.394
4 Se 97.689 152.5 22.5 16.9 6.09 731 5.349
5 As 102.320 0.1 19.3 12.0 3838.84 ? 1496 0.009
6 S 172.119 1493.1 24.1 9.6 1.75 308 91.644
7 Pb 169.322 1626.7 25.1 11.2 1.69 1965 84.609
8 Ag 133.118 181.4 29.5 19.1 5.58 639 2.902
9 Cu 107.018 -1.1 226.9 178.9 300.00 ? 792 0.000
10 Au 88.552 -17.7 328.3 330.8 300.00 ? 2614 0.000
Element f(chi) If/Ip abs-el 1/s-el r-el c/k-el c/k-std
Sb 0.5724 0.0000 0.6863 1.0854 0.9387 1.4301 1.4301
Bi 0.7218 0.0000 1.0371 0.8936 1.0521 1.0256 1.0256
Se 0.4138 0.0020 0.6368 1.2684 0.8536 1.4474 0.9397
S 0.6894 0.0007 0.7721 1.7791 0.7653 0.9505 1.0212
Pb 0.7068 0.0000 1.0273 0.8932 1.0486 1.0393 1.0207
Ag 0.4946 0.0000 0.6215 1.1584 0.9210 1.5082 1.3908
Element El. mass% Norm El% At prop k-value k-(std)
Te 0.00 0.00 0.000 0.00000 0.00000 ?
Sb 0.0429 0.0429 0.0415 0.000300 0.000300 ?
Bi 6.56 6.56 3.696 0.06394 0.06394
Se 2.55 2.55 3.809 0.01764 0.05349
As 0.0037 0.0037 0.0058 0.000024 0.000088 ?
S 12.54 12.54 46.085 0.13193 0.91644
Pb 74.79 74.79 42.525 0.71956 0.84609
Ag 3.51 3.51 3.837 0.02330 0.02902
Cu 0.00 0.00 0.000 0.00000 0.00000 ?
Au 0.00 0.00 0.000 0.00000 -0.00269 ?
-----------------------------------------------------------------------------
Total: 100.00 100.00 100.000
_x000C_
Intensity & Wt. % Group : calib Sample : calib_0029_QNT Page 6
Unknown Specimen No. 6
Path : 0213 Project : calib_0029
Position No. : 6 spot ID : 041-c2-3
Stage : X= 24.1567 Y= 32.7868 Z= 11.5655
Acc. Voltage : 20.0 (kV) Probe Dia. : 0.0 Scan : Off
Dated on 2024/02/14 14:10:50
WDS only No. of accumulation : 1
Curr.(A) : 9.720E-009
Element Peak(mm) Net(cps) Bg- Bg+ S.D.(%) D.L.(ppm) K-raw(%)
1 Te 104.924 -4.7 61.7 64.3 300.00 ? 1457 0.000
2 Sb 109.786 -0.4 54.2 53.6 300.00 ? 1382 0.000
3 Bi 163.785 94.3 22.9 22.8 8.48 3283 6.827
4 Se 97.689 142.9 19.8 15.9 6.28 700 5.013
5 As 102.320 -1.4 20.4 12.7 300.00 ? 1538 0.000
6 S 172.119 1565.8 22.4 12.0 1.71 315 96.077
7 Pb 169.322 1508.0 22.5 11.9 1.75 1886 78.413
8 Ag 133.118 190.7 31.0 17.5 5.41 635 3.050
9 Cu 107.018 356.1 214.0 171.2 5.13 772 6.146
10 Au 88.552 -12.5 312.8 309.0 300.00 ? 2545 0.000
Element f(chi) If/Ip abs-el 1/s-el r-el c/k-el c/k-std
Bi 0.7223 0.0000 1.0377 0.8797 1.0590 1.0343 1.0343
Se 0.4113 0.0022 0.6329 1.2484 0.8594 1.4696 0.9541
S 0.6897 0.0008 0.7725 1.7513 0.7704 0.9588 1.0301
Pb 0.7071 0.0000 1.0278 0.8792 1.0555 1.0484 1.0295
Ag 0.5000 0.0000 0.6283 1.1404 0.9269 1.5057 1.3885
Cu 0.9177 0.0455 0.9378 1.3628 0.8831 0.8475 0.7585
Element El. mass% Norm El% At prop k-value k-(std)
Te 0.00 0.00 0.000 0.00000 0.00000 ?
Sb 0.00 0.00 0.000 0.00000 0.00000 ?
Bi 7.06 7.20 3.858 0.06827 0.06827
Se 2.43 2.48 3.512 0.01653 0.05013
As 0.00 0.00 0.000 0.00000 0.00000 ?
S 13.26 13.51 47.221 0.13831 0.96077
Pb 70.06 71.41 38.606 0.66686 0.78414
Ag 3.69 3.76 3.902 0.02449 0.03050
Cu 1.61 1.65 2.901 0.01905 0.06146
Au 0.00 0.00 0.000 0.00000 -0.00190 ?
-----------------------------------------------------------------------------
Total: 98.12 100.00 100.000
_x000C_
Intensity & Wt. % Group : calib Sample : calib_0029_QNT Page 7
Unknown Specimen No. 7
Path : 0213 Project : calib_0029
Position No. : 7 spot ID : 041-c2-4
Stage : X= 24.1700 Y= 32.7712 Z= 11.5655
Acc. Voltage : 20.0 (kV) Probe Dia. : 0.0 Scan : Off
Dated on 2024/02/14 14:13:38
WDS only No. of accumulation : 1
Curr.(A) : 9.718E-009
Element Peak(mm) Net(cps) Bg- Bg+ S.D.(%) D.L.(ppm) K-raw(%)
1 Te 104.924 1.1 60.7 61.7 686.22 ? 1438 0.021
2 Sb 109.786 28.6 51.0 46.0 26.25 1308 0.568
3 Bi 163.785 369.3 24.5 22.3 3.71 3300 26.748
4 Se 97.689 178.5 18.5 16.5 5.50 700 6.264
5 As 102.320 1.7 15.9 10.1 223.96 ? 1361 0.141
6 S 172.119 1610.9 19.1 9.6 1.69 287 98.869
7 Pb 169.322 850.1 17.6 10.0 2.35 1679 44.214
8 Ag 133.118 891.6 28.3 16.6 2.30 612 14.260
9 Cu 107.018 1.2 207.7 170.3 1107.21 ? 767 0.020
10 Au 88.552 -8.2 297.4 277.5 300.00 ? 2466 0.000
Element f(chi) If/Ip abs-el 1/s-el r-el c/k-el c/k-std
Te 0.6065 0.0000 0.7207 1.0048 0.9613 1.4365 1.4365
Sb 0.5813 0.0000 0.6970 1.0386 0.9571 1.4434 1.4434
Bi 0.7197 0.0001 1.0340 0.8548 1.0738 1.0536 1.0536
Se 0.4048 0.0026 0.6230 1.2126 0.8718 1.5147 0.9834
As 0.3604 0.0024 0.5743 1.2519 0.8659 1.6025 0.9618
S 0.6864 0.0037 0.7688 1.7015 0.7811 0.9751 1.0476
Pb 0.7041 0.0001 1.0234 0.8543 1.0703 1.0686 1.0494
Ag 0.5270 0.0002 0.6621 1.1083 0.9395 1.4501 1.3372
Cu 0.9170 0.0373 0.9371 1.3253 0.8924 0.8698 0.7785
Element El. mass% Norm El% At prop k-value k-(std)
Te 0.0305 0.0296 0.0248 0.000212 0.000212 ?
Sb 0.8195 0.7972 0.6990 0.005678 0.005678
Bi 28.17 27.40 14.002 0.26748 0.26748
Se 3.13 3.04 4.114 0.02065 0.06264
As 0.0623 0.0606 0.0863 0.000389 0.001407
S 13.88 13.50 44.981 0.14233 0.98869
Pb 40.13 39.04 20.124 0.37601 0.44214
Ag 16.57 16.12 15.959 0.11448 0.14261
Cu 0.0055 0.0053 0.0090 0.000063 0.000204 ?
Au 0.00 0.00 0.000 0.00000 -0.00125 ?
-----------------------------------------------------------------------------
Total: 102.80 100.00 100.000
_x000C_
Intensity & Wt. % Group : calib Sample : calib_0029_QNT Page 8
Unknown Specimen No. 8
Path : 0213 Project : calib_0029
Position No. : 8 spot ID : 041-c2-5
Stage : X= 24.1545 Y= 32.7645 Z= 11.5655
Acc. Voltage : 20.0 (kV) Probe Dia. : 0.0 Scan : Off
Dated on 2024/02/14 14:16:25
WDS only No. of accumulation : 1
Curr.(A) : 9.720E-009
Element Peak(mm) Net(cps) Bg- Bg+ S.D.(%) D.L.(ppm) K-raw(%)
1 Te 104.924 0.3 55.5 60.8 2409.50 ? 1396 0.006
2 Sb 109.786 10.6 50.2 43.9 64.45 1287 0.211
3 Bi 163.785 292.6 24.8 19.1 4.20 3153 21.187
4 Se 97.689 168.0 19.7 14.2 5.66 676 5.891
5 As 102.320 -0.4 18.1 11.5 300.00 ? 1452 0.000
6 S 172.119 1583.5 20.3 9.5 1.70 292 97.165
7 Pb 169.322 1062.1 21.9 11.5 2.10 1860 55.226
8 Ag 133.118 708.5 27.7 18.2 2.60 622 11.329
9 Cu 107.018 -6.1 218.5 176.9 300.00 ? 783 0.000
10 Au 88.552 -22.8 313.0 300.8 300.00 ? 2538 0.000
Element f(chi) If/Ip abs-el 1/s-el r-el c/k-el c/k-std
Te 0.6047 0.0000 0.7186 1.0165 0.9563 1.4315 1.4315
Sb 0.5782 0.0000 0.6933 1.0507 0.9521 1.4419 1.4419
Bi 0.7209 0.0001 1.0357 0.8649 1.0679 1.0453 1.0453
Se 0.4078 0.0024 0.6275 1.2271 0.8668 1.4947 0.9704
S 0.6879 0.0029 0.7705 1.7217 0.7768 0.9677 1.0396
Pb 0.7055 0.0001 1.0254 0.8644 1.0644 1.0599 1.0408
Ag 0.5181 0.0001 0.6510 1.1213 0.9345 1.4660 1.3518
Element El. mass% Norm El% At prop k-value k-(std)
Te 0.0083 0.0081 0.0070 0.000058 0.000058 ?
Sb 0.3041 0.2983 0.2682 0.002109 0.002109
Bi 22.14 21.72 11.380 0.21187 0.21187
Se 2.90 2.85 3.948 0.01942 0.05891
As 0.00 0.00 0.000 0.00000 0.00000 ?
S 13.54 13.28 45.356 0.13988 0.97165
Pb 49.73 48.78 25.779 0.46967 0.55226
Ag 13.32 13.07 13.261 0.09095 0.11329
Cu 0.00 0.00 0.000 0.00000 0.00000 ?
Au 0.00 0.00 0.000 0.00000 -0.00347 ?
-----------------------------------------------------------------------------
Total: 101.94 100.00 100.000
_x000C_
Intensity & Wt. % Group : calib Sample : calib_0029_QNT Page 9
Unknown Specimen No. 9
Path : 0213 Project : calib_0029
Position No. : 9 spot ID : 041-c2-6
Stage : X= 24.1792 Y= 32.7554 Z= 11.5655
Acc. Voltage : 20.0 (kV) Probe Dia. : 0.0 Scan : Off
Dated on 2024/02/14 14:19:12
WDS only No. of accumulation : 1
Curr.(A) : 9.720E-009
Element Peak(mm) Net(cps) Bg- Bg+ S.D.(%) D.L.(ppm) K-raw(%)
1 Te 104.924 -274.4 56.2 738.9 300.00 ? 3355 0.000
2 Sb 109.786 8.2 51.8 43.5 82.62 1294 0.163
3 Bi 163.785 319.0 23.7 19.8 4.01 3159 23.102
4 Se 97.689 161.2 21.9 15.9 5.86 714 5.654
5 As 102.320 -0.6 16.8 15.0 300.00 ? 1469 0.000
6 S 172.119 1451.0 17.6 7.9 1.78 269 89.035
7 Pb 169.322 829.2 19.4 10.6 2.38 1756 43.116
8 Ag 133.118 772.9 29.4 18.6 2.48 635 12.359
9 Cu 107.018 0.8 192.8 153.2 1560.55 ? 732 0.014
10 Au 88.552 -10.8 285.8 265.2 300.00 ? 2415 0.000
Element f(chi) If/Ip abs-el 1/s-el r-el c/k-el c/k-std
Sb 0.5793 0.0000 0.6946 1.0432 0.9552 1.4449 1.4449
Bi 0.7202 0.0001 1.0347 0.8586 1.0715 1.0505 1.0505
Se 0.4061 0.0025 0.6250 1.2180 0.8699 1.5063 0.9780
S 0.6870 0.0034 0.7694 1.7091 0.7795 0.9722 1.0445
Pb 0.7046 0.0001 1.0242 0.8581 1.0680 1.0653 1.0462
Ag 0.5239 0.0001 0.6583 1.1132 0.9376 1.4555 1.3421
Element El. mass% Norm El% At prop k-value k-(std)
Te 0.00 0.00 0.000 0.00000 0.00000 ?
Sb 0.2360 0.2524 0.2238 0.001633 0.001633
Bi 24.29 25.99 13.426 0.23102 0.23102
Se 2.81 3.01 4.110 0.01864 0.05654
As 0.00 0.00 0.000 0.00000 0.00000 ?
S 12.46 13.33 44.881 0.12818 0.89035
Pb 39.17 41.91 21.837 0.36667 0.43116
Ag 14.50 15.51 15.516 0.09922 0.12360
Cu 0.0037 0.0040 0.0067 0.000043 0.000138 ?
Au 0.00 0.00 0.000 0.00000 -0.00164 ?
-----------------------------------------------------------------------------
Total: 93.47 100.00 100.000
_x000C_
Intensity & Wt. % Group : calib Sample : calib_0029_QNT Page 10
Unknown Specimen No. 10
Path : 0213 Project : calib_0029
Position No. : 10 spot ID : 041-c2-7
Stage : X= 24.1260 Y= 32.8009 Z= 11.5655
Acc. Voltage : 20.0 (kV) Probe Dia. : 0.0 Scan : Off
Dated on 2024/02/14 14:21:59
WDS only No. of accumulation : 1
Curr.(A) : 9.719E-009
Element Peak(mm) Net(cps) Bg- Bg+ S.D.(%) D.L.(ppm) K-raw(%)
1 Te 104.924 1.5 57.1 61.7 480.94 ? 1412 0.030
2 Sb 109.786 3.6 50.1 51.0 191.09 ? 1339 0.072
3 Bi 163.785 87.0 22.7 18.3 8.72 3059 6.304
4 Se 97.689 156.9 22.5 15.1 5.94 707 5.505
5 As 102.320 -1.0 19.4 12.2 300.00 ? 1501 0.000
6 S 172.119 1505.1 26.5 10.2 1.75 321 92.364
7 Pb 169.322 1645.9 22.6 11.8 1.68 1888 85.590
8 Ag 133.118 175.8 26.7 20.4 5.68 634 2.812
9 Cu 107.018 -1.3 230.0 179.4 300.00 ? 794 0.000
10 Au 88.552 -13.4 320.0 322.8 300.00 ? 2580 0.000
Element f(chi) If/Ip abs-el 1/s-el r-el c/k-el c/k-std
Te 0.6026 0.0000 0.7161 1.0499 0.9430 1.4105 1.4105
Sb 0.5727 0.0000 0.6867 1.0853 0.9388 1.4294 1.4294
Bi 0.7216 0.0000 1.0368 0.8936 1.0522 1.0259 1.0259
Se 0.4140 0.0020 0.6370 1.2683 0.8536 1.4470 0.9394
S 0.6892 0.0007 0.7719 1.7790 0.7654 0.9508 1.0215
Pb 0.7066 0.0000 1.0270 0.8931 1.0487 1.0396 1.0210
Ag 0.4946 0.0000 0.6214 1.1583 0.9210 1.5084 1.3909
Element El. mass% Norm El% At prop k-value k-(std)
Te 0.0420 0.0417 0.0385 0.000298 0.000298 ?
Sb 0.1022 0.1013 0.0980 0.000715 0.000715
Bi 6.47 6.41 3.614 0.06304 0.06304
Se 2.63 2.60 3.884 0.01815 0.05505
As 0.00 0.00 0.000 0.00000 0.00000 ?
S 12.64 12.53 46.064 0.13297 0.92364
Pb 75.60 74.94 42.615 0.72789 0.85590
Ag 3.40 3.37 3.686 0.02257 0.02812
Cu 0.00 0.00 0.000 0.00000 0.00000 ?
Au 0.00 0.00 0.000 0.00000 -0.00204 ?
-----------------------------------------------------------------------------
Total: 100.88 100.00 100.000
_x000C_
Intensity & Wt. % Group : calib Sample : calib_0029_QNT Page 11
Unknown Specimen No. 11
Path : 0213 Project : calib_0029
Position No. : 11 spot ID : 041-c2-8
Stage : X= 24.1383 Y= 32.8028 Z= 11.5655
Acc. Voltage : 20.0 (kV) Probe Dia. : 0.0 Scan : Off
Dated on 2024/02/14 14:24:46
WDS only No. of accumulation : 1
Curr.(A) : 9.718E-009
Element Peak(mm) Net(cps) Bg- Bg+ S.D.(%) D.L.(ppm) K-raw(%)
1 Te 104.924 -1.7 63.2 62.4 300.00 ? 1458 0.000
2 Sb 109.786 -3.2 52.8 50.5 300.00 ? 1352 0.000
3 Bi 163.785 79.9 24.2 23.3 9.55 3339 5.787
4 Se 97.689 144.5 21.6 18.6 6.32 748 5.070
5 As 102.320 -1.2 18.8 15.3 300.00 ? 1532 0.000
6 S 172.119 1519.4 25.9 10.6 1.74 321 93.252
7 Pb 169.322 1652.4 27.8 11.8 1.68 2061 85.937
8 Ag 133.118 155.4 28.4 18.9 6.12 631 2.485
9 Cu 107.018 40.5 223.1 176.1 34.69 785 0.699
10 Au 88.552 -8.6 323.8 318.9 300.00 ? 2589 0.000
Element f(chi) If/Ip abs-el 1/s-el r-el c/k-el c/k-std
Bi 0.7226 0.0000 1.0381 0.8932 1.0522 1.0250 1.0250
Se 0.4141 0.0021 0.6373 1.2677 0.8536 1.4471 0.9395
S 0.6902 0.0006 0.7730 1.7782 0.7654 0.9499 1.0205
Pb 0.7076 0.0000 1.0284 0.8927 1.0487 1.0387 1.0200
Ag 0.4939 0.0000 0.6206 1.1578 0.9210 1.5111 1.3934
Cu 0.9159 0.0471 0.9360 1.3831 0.8787 0.8396 0.7515
Element El. mass% Norm El% At prop k-value k-(std)
Te 0.00 0.00 0.000 0.00000 0.00000 ?
Sb 0.00 0.00 0.000 0.00000 0.00000 ?
Bi 5.93 5.92 3.324 0.05787 0.05787
Se 2.42 2.41 3.587 0.01671 0.05070
As 0.00 0.00 0.000 0.00000 0.00000 ?
S 12.75 12.73 46.585 0.13425 0.93252
Pb 75.89 75.75 42.896 0.73085 0.85937
Ag 3.01 3.01 3.272 0.01995 0.02485
Cu 0.1819 0.1815 0.3352 0.002166 0.006989
Au 0.00 0.00 0.000 0.00000 -0.00130 ?
-----------------------------------------------------------------------------
Total: 100.19 100.00 100.000
_x000C_
Intensity & Wt. % Group : calib Sample : calib_0029_QNT Page 12
Unknown Specimen No. 12
Path : 0213 Project : calib_0029
Position No. : 12 spot ID : 041-c2-9
Stage : X= 24.1029 Y= 32.8336 Z= 11.5655
Acc. Voltage : 20.0 (kV) Probe Dia. : 0.0 Scan : Off
Dated on 2024/02/14 14:27:33
WDS only No. of accumulation : 1
Curr.(A) : 9.718E-009
Element Peak(mm) Net(cps) Bg- Bg+ S.D.(%) D.L.(ppm) K-raw(%)
1 Te 104.924 -23.1 59.3 112.1 300.00 ? 1652 0.000
2 Sb 109.786 0.5 46.2 47.6 1239.50 ? 1290 0.010
3 Bi 163.785 77.5 22.6 22.7 9.67 3271 5.616
4 Se 97.689 137.6 22.4 14.6 6.41 699 4.829
5 As 102.320 -4.9 21.9 14.6 300.00 ? 1608 0.000
6 S 172.119 1492.8 25.4 10.4 1.76 318 91.616
7 Pb 169.322 1635.5 23.9 8.7 1.68 1891 85.061
8 Ag 133.118 152.0 30.1 20.3 6.25 652 2.430
9 Cu 107.018 -6.4 222.9 185.8 300.00 ? 798 0.000
10 Au 88.552 -19.1 327.1 318.3 300.00 ? 2598 0.000
Element f(chi) If/Ip abs-el 1/s-el r-el c/k-el c/k-std
Sb 0.5721 0.0000 0.6860 1.0865 0.9381 1.4303 1.4303
Bi 0.7229 0.0000 1.0386 0.8945 1.0514 1.0236 1.0236
Se 0.4144 0.0021 0.6376 1.2697 0.8530 1.4450 0.9382
S 0.6906 0.0006 0.7735 1.7809 0.7648 0.9486 1.0191
Pb 0.7079 0.0000 1.0290 0.8941 1.0479 1.0372 1.0186
Ag 0.4933 0.0000 0.6198 1.1596 0.9204 1.5116 1.3939
Element El. mass% Norm El% At prop k-value k-(std)
Te 0.00 0.00 0.000 0.00000 0.00000 ?
Sb 0.0150 0.0152 0.0147 0.000105 0.000105 ?
Bi 5.75 5.83 3.287 0.05616 0.05616
Se 2.30 2.33 3.481 0.01592 0.04829
As 0.00 0.00 0.000 0.00000 0.00000 ?
S 12.51 12.68 46.619 0.13189 0.91616
Pb 75.15 76.16 43.332 0.72339 0.85061
Ag 2.95 2.99 3.266 0.01951 0.02431
Cu 0.00 0.00 0.000 0.00000 0.00000 ?
Au 0.00 0.00 0.000 0.00000 -0.00290 ?
-----------------------------------------------------------------------------
Total: 98.67 100.00 100.000
_x000C_
Intensity & Wt. % Group : calib Sample : calib_0029_QNT Page 13
Unknown Specimen No. 13
Path : 0213 Project : calib_0029
Position No. : 13 spot ID : 041-c2-10
Stage : X= 24.1082 Y= 32.8265 Z= 11.5655
Acc. Voltage : 20.0 (kV) Probe Dia. : 3.0 Scan : Off
Dated on 2024/02/14 14:30:21
WDS only No. of accumulation : 1
Curr.(A) : 9.718E-009
Element Peak(mm) Net(cps) Bg- Bg+ S.D.(%) D.L.(ppm) K-raw(%)
1 Te 104.924 -5.2 58.2 68.3 300.00 ? 1452 0.000
2 Sb 109.786 23.4 48.2 44.6 30.91 1280 0.464
3 Bi 163.785 442.8 23.5 15.6 3.32 2942 32.072
4 Se 97.689 165.3 19.7 16.6 5.77 709 5.798
5 As 102.320 -3.3 18.5 13.3 300.00 ? 1493 0.000
6 S 172.119 1641.4 17.2 9.2 1.67 276 100.737
7 Pb 169.322 634.5 13.8 10.5 2.72 1532 33.002
8 Ag 133.118 1018.2 24.8 19.8 2.15 618 16.285
9 Cu 107.018 -2.3 201.7 168.4 300.00 ? 760 0.000
10 Au 88.552 -11.7 295.6 270.3 300.00 ? 2453 0.000
Element f(chi) If/Ip abs-el 1/s-el r-el c/k-el c/k-std
Sb 0.5828 0.0000 0.6987 1.0280 0.9610 1.4486 1.4486
Bi 0.7211 0.0001 1.0360 0.8460 1.0784 1.0579 1.0579
Se 0.4042 0.0027 0.6220 1.1999 0.8757 1.5259 0.9907
S 0.6878 0.0043 0.7703 1.6840 0.7845 0.9784 1.0511
Pb 0.7055 0.0001 1.0254 0.8455 1.0749 1.0729 1.0537
Ag 0.5332 0.0002 0.6699 1.0969 0.9435 1.4421 1.3298
Element El. mass% Norm El% At prop k-value k-(std)
Te 0.00 0.00 0.000 0.00000 0.00000 ?
Sb 0.6724 0.6681 0.5707 0.004642 0.004642
Bi 33.92 33.70 16.779 0.32072 0.32072
Se 2.92 2.90 3.819 0.01912 0.05799
As 0.00 0.00 0.000 0.00000 0.00000 ?
S 14.19 14.10 45.754 0.14502 1.00737
Pb 30.11 29.91 15.021 0.28066 0.33002
Ag 18.85 18.72 18.056 0.13074 0.16285
Cu 0.00 0.00 0.000 0.00000 0.00000 ?
Au 0.00 0.00 0.000 0.00000 -0.00178 ?
-----------------------------------------------------------------------------
Total: 100.65 100.00 100.000
_x000C_
Intensity & Wt. % Group : calib Sample : calib_0029_QNT Page 14
Unknown Specimen No. 14
Path : 0213 Project : calib_0029
Position No. : 14 spot ID : 041-c2-11
Stage : X= 24.1178 Y= 32.8039 Z= 11.5655
Acc. Voltage : 20.0 (kV) Probe Dia. : 4.0 Scan : Off
Dated on 2024/02/14 14:33:08
WDS only No. of accumulation : 1
Curr.(A) : 9.716E-009
Element Peak(mm) Net(cps) Bg- Bg+ S.D.(%) D.L.(ppm) K-raw(%)
1 Te 104.924 1.5 55.2 62.0 489.73 ? 1400 0.029
2 Sb 109.786 22.2 52.2 41.2 32.29 1279 0.441
3 Bi 163.785 420.4 25.4 18.2 3.43 3126 30.457
4 Se 97.689 179.1 21.0 15.3 5.49 700 6.284
5 As 102.320 -0.6 18.1 14.6 300.00 ? 1502 0.000
6 S 172.119 1657.9 18.7 8.4 1.66 278 101.774
7 Pb 169.322 685.2 17.7 8.7 2.63 1663 35.643
8 Ag 133.118 985.1 23.7 16.8 2.18 586 15.759
9 Cu 107.018 -1.8 206.8 171.1 300.00 ? 767 0.000
10 Au 88.552 0.3 291.9 273.0 5050.32 ? 2444 0.005
Element f(chi) If/Ip abs-el 1/s-el r-el c/k-el c/k-std
Te 0.6072 0.0000 0.7216 0.9950 0.9650 1.4432 1.4432
Sb 0.5830 0.0000 0.6990 1.0284 0.9609 1.4476 1.4476
Bi 0.7207 0.0001 1.0355 0.8463 1.0783 1.0582 1.0582
Se 0.4054 0.0027 0.6238 1.2004 0.8756 1.5210 0.9875
S 0.6874 0.0041 0.7699 1.6847 0.7844 0.9789 1.0516
Pb 0.7051 0.0001 1.0249 0.8458 1.0748 1.0732 1.0539
Ag 0.5321 0.0002 0.6686 1.0974 0.9433 1.4446 1.3321
Au 0.9522 0.0000 1.0035 0.8698 1.0390 1.1027 1.1027
Element El. mass% Norm El% At prop k-value k-(std)
Te 0.0419 0.0414 0.0337 0.000290 0.000290 ?
Sb 0.6385 0.6311 0.5387 0.004411 0.004411
Bi 32.22 31.84 15.840 0.30457 0.30457
Se 3.15 3.11 4.100 0.02072 0.06284
As 0.00 0.00 0.000 0.00000 0.00000 ?
S 14.34 14.18 45.967 0.14651 1.01774
Pb 32.52 32.14 16.127 0.30312 0.35643
Ag 18.26 18.05 17.391 0.12651 0.15759
Cu 0.00 0.00 0.000 0.00000 0.00000 ?
Au 0.0057 0.0057 0.0030 0.000052 0.000052 ?
-----------------------------------------------------------------------------
Total: 101.18 100.00 100.000
_x000C_
Intensity & Wt. % Group : calib Sample : calib_0029_QNT Page 15
Unknown Specimen No. 15
Path : 0213 Project : calib_0029
Position No. : 15 spot ID : 041-c2-12
Stage : X= 24.1572 Y= 32.7720 Z= 11.5655
Acc. Voltage : 20.0 (kV) Probe Dia. : 4.0 Scan : Off
Dated on 2024/02/14 14:35:55
WDS only No. of accumulation : 1
Curr.(A) : 9.716E-009
Element Peak(mm) Net(cps) Bg- Bg+ S.D.(%) D.L.(ppm) K-raw(%)
1 Te 104.924 -2.7 59.4 58.5 300.00 ? 1413 0.000
2 Sb 109.786 37.2 50.0 44.2 20.64 1288 0.739
3 Bi 163.785 402.5 25.5 19.5 3.52 3192 29.157
4 Se 97.689 174.4 19.0 14.6 5.54 677 6.118
5 As 102.320 0.2 16.8 13.0 2141.86 ? 1438 0.015
6 S 172.119 1645.3 18.5 10.1 1.67 288 101.000
7 Pb 169.322 703.0 18.6 10.0 2.60 1718 36.570
8 Ag 133.118 959.6 23.3 17.5 2.21 590 15.351
9 Cu 107.018 4.2 203.6 173.6 318.03 ? 769 0.072
10 Au 88.552 -11.9 304.6 276.0 300.00 ? 2488 0.000
Element f(chi) If/Ip abs-el 1/s-el r-el c/k-el c/k-std
Sb 0.5836 0.0000 0.6998 1.0286 0.9609 1.4458 1.4458
Bi 0.7207 0.0001 1.0355 0.8465 1.0783 1.0580 1.0580
Se 0.4049 0.0027 0.6231 1.2006 0.8756 1.5227 0.9886
As 0.3600 0.0025 0.5735 1.2395 0.8697 1.6133 0.9683
S 0.6874 0.0041 0.7699 1.6849 0.7844 0.9788 1.0515
Pb 0.7051 0.0001 1.0248 0.8460 1.0748 1.0731 1.0538
Ag 0.5323 0.0003 0.6688 1.0976 0.9433 1.4438 1.3314
Cu 0.9175 0.0357 0.9376 1.3128 0.8952 0.8762 0.7843
Element El. mass% Norm El% At prop k-value k-(std)
Te 0.00 0.00 0.000 0.00000 0.00000 ?
Sb 1.07 1.06 0.908 0.00739 0.00739
Bi 30.84 30.72 15.287 0.29157 0.29157
Se 3.07 3.06 4.029 0.02017 0.06118
As 0.0067 0.0067 0.0093 0.000042 0.000151 ?
S 14.23 14.17 45.978 0.14540 1.01000
Pb 33.37 33.24 16.681 0.31101 0.36570
Ag 17.79 17.72 17.076 0.12324 0.15351
Cu 0.0195 0.0194 0.0317 0.000222 0.000717 ?
Au 0.00 0.00 0.000 0.00000 -0.00181 ?
-----------------------------------------------------------------------------
Total: 100.40 100.00 100.000
_x000C_
Intensity & Wt. % Group : calib Sample : calib_0029_QNT Page 16
Unknown Specimen No. 16
Path : 0213 Project : calib_0029
Position No. : 16 spot ID : 041-c2-13
Stage : X= 23.9411 Y= 32.4879 Z= 11.5605
Acc. Voltage : 20.0 (kV) Probe Dia. : 0.0 Scan : Off
Dated on 2024/02/14 14:38:43
WDS only No. of accumulation : 1
Curr.(A) : 9.714E-009
Element Peak(mm) Net(cps) Bg- Bg+ S.D.(%) D.L.(ppm) K-raw(%)
1 Te 104.924 -7.7 59.7 80.1 300.00 ? 1517 0.000
2 Sb 109.786 7.1 49.8 51.9 99.05 1345 0.141
3 Bi 163.785 127.8 20.4 22.5 6.92 3208 9.264
4 Se 97.689 140.6 21.6 17.3 6.39 731 4.936
5 As 102.320 -0.3 18.1 14.9 300.00 ? 1507 0.000
6 S 172.119 1552.3 23.0 9.6 1.72 304 95.310
7 Pb 169.322 1548.5 25.2 12.8 1.73 1990 80.569
8 Ag 133.118 220.4 27.6 19.4 4.96 631 3.526
9 Cu 107.018 -0.0 222.1 179.2 300.00 ? 789 0.000
10 Au 88.552 -4.1 320.3 312.6 300.00 ? 2573 0.000
Element f(chi) If/Ip abs-el 1/s-el r-el c/k-el c/k-std
Sb 0.5737 0.0000 0.6879 1.0800 0.9405 1.4313 1.4313
Bi 0.7231 0.0000 1.0388 0.8892 1.0542 1.0269 1.0269
Se 0.4136 0.0021 0.6365 1.2621 0.8553 1.4525 0.9430
S 0.6907 0.0009 0.7736 1.7703 0.7668 0.9514 1.0222
Pb 0.7080 0.0000 1.0291 0.8887 1.0507 1.0406 1.0219
Ag 0.4967 0.0000 0.6241 1.1527 0.9228 1.5064 1.3891
Element El. mass% Norm El% At prop k-value k-(std)
Te 0.00 0.00 0.000 0.00000 0.00000 ?
Sb 0.2015 0.2002 0.1907 0.001408 0.001408
Bi 9.51 9.45 5.245 0.09264 0.09264
Se 2.36 2.35 3.449 0.01627 0.04936
As 0.00 0.00 0.000 0.00000 0.00000 ?
S 13.06 12.97 46.928 0.13721 0.95310
Pb 71.26 70.79 39.633 0.68520 0.80569
Ag 4.26 4.24 4.554 0.02831 0.03526
Cu 0.00 0.00 0.000 0.00000 0.00000 ?
Au 0.00 0.00 0.000 0.00000 -0.00063 ?
-----------------------------------------------------------------------------
Total: 100.65 100.00 100.000
_x000C_
Intensity & Wt. % Group : calib Sample : calib_0029_QNT Page 17
Unknown Specimen No. 17
Path : 0213 Project : calib_0029
Position No. : 17 spot ID : 041-c2-14
Stage : X= 23.9372 Y= 32.4918 Z= 11.5605
Acc. Voltage : 20.0 (kV) Probe Dia. : 0.0 Scan : Off
Dated on 2024/02/14 14:41:30
WDS only No. of accumulation : 1
Curr.(A) : 9.712E-009
Element Peak(mm) Net(cps) Bg- Bg+ S.D.(%) D.L.(ppm) K-raw(%)
1 Te 104.924 -5.6 54.3 74.0 300.00 ? 1452 0.000
2 Sb 109.786 5.5 54.3 44.4 123.62 ? 1317 0.109
3 Bi 163.785 108.0 21.5 21.9 7.70 3207 7.824
4 Se 97.689 141.1 21.3 16.5 6.35 719 4.954
5 As 102.320 -2.9 19.2 13.6 300.00 ? 1519 0.000
6 S 172.119 1541.9 24.2 9.8 1.73 310 94.688
7 Pb 169.322 1576.2 23.3 11.8 1.71 1914 82.024
8 Ag 133.118 213.1 30.8 20.1 5.10 655 3.411
9 Cu 107.018 -1.1 216.2 185.1 300.00 ? 793 0.000
10 Au 88.552 -7.3 322.8 315.9 300.00 ? 2584 0.000
Element f(chi) If/Ip abs-el 1/s-el r-el c/k-el c/k-std
Sb 0.5734 0.0000 0.6875 1.0806 0.9403 1.4315 1.4315
Bi 0.7231 0.0000 1.0389 0.8897 1.0539 1.0265 1.0265
Se 0.4138 0.0021 0.6369 1.2628 0.8551 1.4511 0.9421
S 0.6907 0.0009 0.7736 1.7713 0.7666 0.9511 1.0218
Pb 0.7081 0.0000 1.0292 0.8892 1.0504 1.0402 1.0215
Ag 0.4965 0.0000 0.6238 1.1534 0.9226 1.5065 1.3892
Element El. mass% Norm El% At prop k-value k-(std)
Te 0.00 0.00 0.000 0.00000 0.00000 ?
Sb 0.1567 0.1564 0.1492 0.001095 0.001095
Bi 8.03 8.02 4.455 0.07824 0.07824
Se 2.37 2.37 3.480 0.01633 0.04954
As 0.00 0.00 0.000 0.00000 0.00000 ?
S 12.96 12.94 46.887 0.13631 0.94688
Pb 72.55 72.41 40.595 0.69757 0.82024
Ag 4.12 4.12 4.433 0.02738 0.03411
Cu 0.00 0.00 0.000 0.00000 0.00000 ?
Au 0.00 0.00 0.000 0.00000 -0.00111 ?
-----------------------------------------------------------------------------
Total: 100.19 100.00 100.000
_x000C_
Intensity & Wt. % Group : calib Sample : calib_0029_QNT Page 18
Unknown Specimen No. 18
Path : 0213 Project : calib_0029
Position No. : 18 spot ID : 041-c2-15
Stage : X= 23.9362 Y= 32.4881 Z= 11.5605
Acc. Voltage : 20.0 (kV) Probe Dia. : 0.0 Scan : Off
Dated on 2024/02/14 14:44:17
WDS only No. of accumulation : 1
Curr.(A) : 9.714E-009
Element Peak(mm) Net(cps) Bg- Bg+ S.D.(%) D.L.(ppm) K-raw(%)
1 Te 104.924 -12.3 56.6 82.6 300.00 ? 1508 0.000
2 Sb 109.786 84.5 47.1 44.7 10.55 1274 1.677
3 Bi 163.785 428.3 26.8 19.1 3.41 3206 31.035
4 Se 97.689 152.0 20.4 14.2 6.01 681 5.335
5 As 102.320 -1.5 17.7 12.6 300.00 ? 1459 0.000
6 S 172.119 1693.5 19.7 9.2 1.64 287 103.977
7 Pb 169.322 720.2 18.5 10.0 2.56 1714 37.470
8 Ag 133.118 676.2 25.2 18.9 2.66 613 10.820
9 Cu 107.018 7.8 203.1 170.3 169.54 ? 764 0.134
10 Au 88.552 -10.5 304.7 274.3 300.00 ? 2488 0.000
Element f(chi) If/Ip abs-el 1/s-el r-el c/k-el c/k-std
Sb 0.5864 0.0000 0.7031 1.0361 0.9573 1.4339 1.4339
Bi 0.7220 0.0001 1.0374 0.8527 1.0740 1.0525 1.0525
Se 0.4065 0.0027 0.6255 1.2096 0.8720 1.5118 0.9815
S 0.6890 0.0031 0.7716 1.6974 0.7813 0.9742 1.0466
Pb 0.7066 0.0001 1.0270 0.8522 1.0705 1.0672 1.0481
Ag 0.5229 0.0006 0.6570 1.1056 0.9397 1.4641 1.3501
Cu 0.9170 0.0370 0.9372 1.3221 0.8926 0.8719 0.7804
Element El. mass% Norm El% At prop k-value k-(std)
Te 0.00 0.00 0.000 0.00000 0.00000 ?
Sb 2.41 2.43 2.085 0.01677 0.01677
Bi 32.67 32.97 16.503 0.31035 0.31035
Se 2.66 2.68 3.556 0.01759 0.05335
As 0.00 0.00 0.000 0.00000 0.00000 ?
S 14.58 14.71 48.014 0.14969 1.03977
Pb 34.02 34.33 17.333 0.31866 0.37470
Ag 12.72 12.84 12.449 0.08686 0.10820
Cu 0.0363 0.0366 0.0603 0.000416 0.001342
Au 0.00 0.00 0.000 0.00000 -0.00159 ?
-----------------------------------------------------------------------------
Total: 99.10 100.00 100.000
_x000C_
Intensity & Wt. % Group : calib Sample : calib_0029_QNT Page 19
Unknown Specimen No. 19
Path : 0213 Project : calib_0029
Position No. : 19 spot ID : 041-c2-16
Stage : X= 23.9393 Y= 32.4819 Z= 11.5605
Acc. Voltage : 20.0 (kV) Probe Dia. : 0.0 Scan : Off
Dated on 2024/02/14 14:47:04
WDS only No. of accumulation : 1
Curr.(A) : 9.714E-009
Element Peak(mm) Net(cps) Bg- Bg+ S.D.(%) D.L.(ppm) K-raw(%)
1 Te 104.924 -164.1 51.0 450.0 300.00 ? 2684 0.000
2 Sb 109.786 83.4 44.8 41.1 10.47 1232 1.655
3 Bi 163.785 457.7 23.4 17.8 3.27 3054 33.162
4 Se 97.689 140.7 19.4 14.8 6.30 682 4.939
5 As 102.320 1.7 16.1 12.0 228.33 ? 1400 0.141
6 S 172.119 1652.0 14.0 9.9 1.66 266 101.432
7 Pb 169.322 530.5 17.0 11.7 3.01 1683 27.603
8 Ag 133.118 710.4 23.2 16.8 2.58 583 11.367
9 Cu 107.018 8.7 196.3 164.4 149.54 ? 751 0.150
10 Au 88.552 -5.4 286.7 255.1 300.00 ? 2410 0.000
Element f(chi) If/Ip abs-el 1/s-el r-el c/k-el c/k-std
Sb 0.5888 0.0000 0.7060 1.0264 0.9610 1.4361 1.4361
Bi 0.7227 0.0001 1.0384 0.8446 1.0783 1.0573 1.0573
Se 0.4060 0.0028 0.6247 1.1980 0.8756 1.5217 0.9879
As 0.3614 0.0026 0.5759 1.2368 0.8697 1.6102 0.9664
S 0.6896 0.0035 0.7724 1.6813 0.7845 0.9782 1.0509
Pb 0.7072 0.0001 1.0279 0.8441 1.0749 1.0721 1.0528
Ag 0.5276 0.0007 0.6629 1.0952 0.9434 1.4590 1.3454
Cu 0.9175 0.0354 0.9376 1.3100 0.8953 0.8783 0.7861
Element El. mass% Norm El% At prop k-value k-(std)
Te 0.00 0.00 0.000 0.00000 0.00000 ?
Sb 2.38 2.56 2.142 0.01655 0.01655
Bi 35.14 37.80 18.447 0.33162 0.33162
Se 2.48 2.67 3.445 0.01628 0.04939
As 0.0628 0.0675 0.0919 0.000390 0.001412
S 14.28 15.36 48.866 0.14602 1.01432
Pb 25.21 27.12 13.349 0.23475 0.27603
Ag 13.36 14.38 13.588 0.09126 0.11367
Cu 0.0408 0.0438 0.0704 0.000464 0.001497
Au 0.00 0.00 0.000 0.00000 -0.00083 ?
-----------------------------------------------------------------------------
Total: 92.96 100.00 100.000
_x000C_
Intensity & Wt. % Group : calib Sample : calib_0029_QNT Page 20
Unknown Specimen No. 20
Path : 0213 Project : calib_0029
Position No. : 20 spot ID : 041-c2-17
Stage : X= 23.9327 Y= 32.5143 Z= 11.5605
Acc. Voltage : 20.0 (kV) Probe Dia. : 5.0 Scan : Off
Dated on 2024/02/14 14:49:51
WDS only No. of accumulation : 1
Curr.(A) : 9.716E-009
Element Peak(mm) Net(cps) Bg- Bg+ S.D.(%) D.L.(ppm) K-raw(%)
1 Te 104.924 -3.9 62.0 63.4 300.00 ? 1455 0.000
2 Sb 109.786 4.5 48.4 52.1 153.26 ? 1337 0.090
3 Bi 163.785 158.2 24.2 22.8 6.10 3316 11.461
4 Se 97.689 133.9 20.8 14.3 6.49 685 4.697
5 As 102.320 0.2 17.8 12.9 1832.67 ? 1466 0.018
6 S 172.119 1526.5 25.1 11.6 1.74 324 93.703
7 Pb 169.322 1437.5 25.2 10.0 1.80 1953 74.775
8 Ag 133.118 336.3 29.5 18.9 3.90 638 5.381
9 Cu 107.018 -2.7 218.4 183.9 300.00 ? 793 0.000
10 Au 88.552 -12.8 319.7 314.2 300.00 ? 2572 0.000
Element f(chi) If/Ip abs-el 1/s-el r-el c/k-el c/k-std
Sb 0.5739 0.0000 0.6881 1.0749 0.9425 1.4345 1.4345
Bi 0.7229 0.0000 1.0386 0.8849 1.0566 1.0297 1.0297
Se 0.4115 0.0022 0.6332 1.2559 0.8573 1.4635 0.9502
As 0.3675 0.0020 0.5855 1.2967 0.8515 1.5436 0.9264
S 0.6904 0.0014 0.7733 1.7617 0.7686 0.9538 1.0247
Pb 0.7078 0.0000 1.0288 0.8844 1.0531 1.0436 1.0248
Ag 0.5013 0.0000 0.6299 1.1472 0.9248 1.4963 1.3798
Element El. mass% Norm El% At prop k-value k-(std)
Te 0.00 0.00 0.000 0.00000 0.00000 ?
Sb 0.1284 0.1285 0.1215 0.000895 0.000895
Bi 11.80 11.81 6.507 0.11461 0.11461
Se 2.27 2.27 3.307 0.01549 0.04697
As 0.0077 0.0077 0.0118 0.000050 0.000180 ?
S 12.87 12.88 46.242 0.13489 0.93703
Pb 66.37 66.43 36.908 0.63592 0.74775
Ag 6.46 6.47 6.902 0.04320 0.05380
Cu 0.00 0.00 0.000 0.00000 0.00000 ?
Au 0.00 0.00 0.000 0.00000 -0.00194 ?
-----------------------------------------------------------------------------
Total: 99.90 100.00 100.000
_x000C_
Intensity & Wt. % Group : calib Sample : calib_0029_QNT Page 21
Unknown Specimen No. 21
Path : 0213 Project : calib_0029
Position No. : 21 spot ID : 041-c2-18
Stage : X= 24.1014 Y= 32.5809 Z= 11.5605
Acc. Voltage : 20.0 (kV) Probe Dia. : 3.0 Scan : Off
Dated on 2024/02/14 14:52:38
WDS only No. of accumulation : 1
Curr.(A) : 9.714E-009
Element Peak(mm) Net(cps) Bg- Bg+ S.D.(%) D.L.(ppm) K-raw(%)
1 Te 104.924 0.3 59.2 52.1 2590.61 ? 1381 0.005
2 Sb 109.786 8.3 51.3 45.4 82.60 1306 0.165
3 Bi 163.785 350.8 28.0 18.2 3.80 3194 25.416
4 Se 97.689 152.0 19.6 16.8 6.07 711 5.334
5 As 102.320 -0.9 19.3 14.0 300.00 ? 1527 0.000
6 S 172.119 1610.3 19.9 9.3 1.69 289 98.869
7 Pb 169.322 894.0 18.3 8.5 2.29 1684 46.517
8 Ag 133.118 795.2 25.3 17.3 2.44 600 12.723
9 Cu 107.018 -0.0 206.3 169.1 300.00 ? 764 0.000
10 Au 88.552 -9.3 307.3 299.9 300.00 ? 2520 0.000
Element f(chi) If/Ip abs-el 1/s-el r-el c/k-el c/k-std
Te 0.6049 0.0000 0.7189 1.0088 0.9591 1.4376 1.4376
Sb 0.5794 0.0000 0.6947 1.0428 0.9550 1.4454 1.4454
Bi 0.7222 0.0001 1.0376 0.8583 1.0712 1.0482 1.0482
Se 0.4070 0.0026 0.6262 1.2176 0.8696 1.5042 0.9766
S 0.6892 0.0033 0.7719 1.7085 0.7793 0.9698 1.0419
Pb 0.7068 0.0001 1.0273 0.8578 1.0677 1.0627 1.0436
Ag 0.5224 0.0001 0.6563 1.1128 0.9374 1.4606 1.3469
Element El. mass% Norm El% At prop k-value k-(std)
Te 0.0078 0.0077 0.0065 0.000054 0.000054 ?
Sb 0.2383 0.2377 0.2094 0.001649 0.001649
Bi 26.64 26.56 13.637 0.25416 0.25416
Se 2.64 2.64 3.584 0.01758 0.05334
As 0.00 0.00 0.000 0.00000 0.00000 ?
S 13.80 13.76 46.066 0.14233 0.98869
Pb 42.04 41.92 21.706 0.39560 0.46517
Ag 14.92 14.87 14.791 0.10214 0.12723
Cu 0.00 0.00 0.000 0.00000 0.00000 ?
Au 0.00 0.00 0.000 0.00000 -0.00141 ?
-----------------------------------------------------------------------------
Total: 100.29 100.00 100.000
_x000C_
Intensity & Wt. % Group : calib Sample : calib_0029_QNT Page 22
Unknown Specimen No. 22
Path : 0213 Project : calib_0029
Position No. : 22 spot ID : 041-c3-1
Stage : X= 26.5334 Y= 25.2412 Z= 11.6070
Acc. Voltage : 20.0 (kV) Probe Dia. : 0.0 Scan : Off
Dated on 2024/02/14 14:55:26
WDS only No. of accumulation : 1
Curr.(A) : 9.714E-009
Element Peak(mm) Net(cps) Bg- Bg+ S.D.(%) D.L.(ppm) K-raw(%)
1 Te 104.924 3.5 55.5 55.0 206.36 ? 1368 0.068
2 Sb 109.786 1.6 54.5 46.8 424.37 ? 1335 0.032
3 Bi 163.785 103.7 23.4 21.3 7.91 3226 7.513
4 Se 97.689 152.6 21.8 18.0 6.10 741 5.356
5 As 102.320 -2.3 20.9 14.0 300.00 ? 1572 0.000
6 S 172.119 1527.5 23.2 10.9 1.73 312 93.786
7 Pb 169.322 1564.4 25.6 9.6 1.72 1962 81.395
8 Ag 133.118 206.2 32.7 20.9 5.22 671 3.299
9 Cu 107.018 -4.6 227.0 182.8 300.00 ? 797 0.000
10 Au 88.552 -13.7 327.5 302.9 300.00 ? 2586 0.000
Element f(chi) If/Ip abs-el 1/s-el r-el c/k-el c/k-std
Te 0.6033 0.0000 0.7169 1.0450 0.9447 1.4129 1.4129
Sb 0.5737 0.0000 0.6878 1.0803 0.9405 1.4310 1.4310
Bi 0.7225 0.0000 1.0380 0.8894 1.0542 1.0275 1.0275
Se 0.4143 0.0021 0.6376 1.2623 0.8553 1.4495 0.9411
S 0.6900 0.0008 0.7728 1.7707 0.7668 0.9522 1.0230
Pb 0.7074 0.0000 1.0282 0.8889 1.0507 1.0413 1.0226
Ag 0.4965 0.0000 0.6238 1.1530 0.9228 1.5067 1.3893
Element El. mass% Norm El% At prop k-value k-(std)
Te 0.0959 0.0965 0.0878 0.000679 0.000679
Sb 0.0454 0.0456 0.0435 0.000317 0.000317
Bi 7.72 7.77 4.313 0.07513 0.07513
Se 2.56 2.58 3.785 0.01766 0.05356
As 0.00 0.00 0.000 0.00000 0.00000 ?
S 12.86 12.93 46.814 0.13502 0.93786
Pb 72.13 72.57 40.640 0.69222 0.81395
Ag 3.99 4.01 4.317 0.02648 0.03299
Cu 0.00 0.00 0.000 0.00000 0.00000 ?
Au 0.00 0.00 0.000 0.00000 -0.00208 ?
-----------------------------------------------------------------------------
Total: 99.39 100.00 100.000
_x000C_
Intensity & Wt. % Group : calib Sample : calib_0029_QNT Page 23
Unknown Specimen No. 23
Path : 0213 Project : calib_0029
Position No. : 23 spot ID : 041-c3-2
Stage : X= 26.5405 Y= 25.2269 Z= 11.6060
Acc. Voltage : 20.0 (kV) Probe Dia. : 0.0 Scan : Off
Dated on 2024/02/14 14:58:13
WDS only No. of accumulation : 1
Curr.(A) : 9.714E-009
Element Peak(mm) Net(cps) Bg- Bg+ S.D.(%) D.L.(ppm) K-raw(%)
1 Te 104.924 1.5 59.5 50.7 476.43 ? 1376 0.029
2 Sb 109.786 6.0 44.7 45.0 109.06 ? 1262 0.120
3 Bi 163.785 94.3 21.8 19.8 8.32 3112 6.834
4 Se 97.689 158.4 22.0 16.2 5.93 719 5.558
5 As 102.320 -0.5 18.3 14.4 300.00 ? 1505 0.000
6 S 172.119 1513.6 26.8 10.7 1.74 326 92.935
7 Pb 169.322 1593.5 26.1 11.0 1.71 1996 82.907
8 Ag 133.118 195.1 32.6 20.3 5.39 666 3.122
9 Cu 107.018 -2.7 222.2 181.9 300.00 ? 793 0.000
10 Au 88.552 -2.4 310.7 321.4 300.00 ? 2551 0.000
Element f(chi) If/Ip abs-el 1/s-el r-el c/k-el c/k-std
Te 0.6033 0.0000 0.7169 1.0466 0.9442 1.4115 1.4115
Sb 0.5735 0.0000 0.6877 1.0819 0.9400 1.4300 1.4300
Bi 0.7219 0.0000 1.0371 0.8907 1.0536 1.0274 1.0274
Se 0.4142 0.0021 0.6374 1.2643 0.8548 1.4488 0.9406
S 0.6894 0.0008 0.7721 1.7733 0.7664 0.9522 1.0230
Pb 0.7068 0.0000 1.0273 0.8903 1.0501 1.0412 1.0225
Ag 0.4960 0.0001 0.6232 1.1547 0.9223 1.5066 1.3893
Element El. mass% Norm El% At prop k-value k-(std)
Te 0.0415 0.0416 0.0380 0.000294 0.000294 ?
Sb 0.1713 0.1716 0.1644 0.001198 0.001198
Bi 7.02 7.03 3.926 0.06835 0.06835
Se 2.65 2.66 3.929 0.01832 0.05558
As 0.00 0.00 0.000 0.00000 0.00000 ?
S 12.74 12.76 46.437 0.13379 0.92935
Pb 73.43 73.55 41.415 0.70508 0.82907
Ag 3.78 3.78 4.090 0.02507 0.03122
Cu 0.00 0.00 0.000 0.00000 0.00000 ?
Au 0.00 0.00 0.000 0.00000 -0.00037 ?
-----------------------------------------------------------------------------
Total: 99.83 100.00 100.000
_x000C_
Intensity & Wt. % Group : calib Sample : calib_0029_QNT Page 24
Unknown Specimen No. 24
Path : 0213 Project : calib_0029
Position No. : 24 spot ID : 041-c3-3
Stage : X= 26.5559 Y= 25.2396 Z= 11.6060
Acc. Voltage : 20.0 (kV) Probe Dia. : 0.0 Scan : Off
Dated on 2024/02/14 15:01:00
WDS only No. of accumulation : 1
Curr.(A) : 9.715E-009
Element Peak(mm) Net(cps) Bg- Bg+ S.D.(%) D.L.(ppm) K-raw(%)
1 Te 104.924 -2.9 60.4 59.5 300.00 ? 1426 0.000
2 Sb 109.786 91.9 51.7 45.5 10.02 1309 1.825
3 Bi 163.785 496.6 24.8 18.7 3.14 3135 35.978
4 Se 97.689 202.2 21.7 14.8 5.11 698 7.096
5 As 102.320 -2.4 19.4 12.1 300.00 ? 1501 0.000
6 S 172.119 1715.8 15.3 8.8 1.63 265 105.338
7 Pb 169.322 588.0 15.6 9.6 2.84 1593 30.590
8 Ag 133.118 711.6 22.9 18.9 2.59 599 11.385
9 Cu 107.018 -5.1 210.8 169.8 300.00 ? 769 0.000
10 Au 88.552 -19.3 310.8 273.3 300.00 ? 2506 0.000
Element f(chi) If/Ip abs-el 1/s-el r-el c/k-el c/k-std
Sb 0.5888 0.0000 0.7060 1.0310 0.9595 1.4318 1.4318
Bi 0.7192 0.0001 1.0333 0.8484 1.0766 1.0594 1.0594
Se 0.4073 0.0027 0.6268 1.2034 0.8742 1.5125 0.9820
S 0.6858 0.0032 0.7681 1.6888 0.7832 0.9810 1.0540
Pb 0.7036 0.0001 1.0226 0.8479 1.0731 1.0746 1.0553
Ag 0.5251 0.0007 0.6597 1.1001 0.9420 1.4618 1.3480
Element El. mass% Norm El% At prop k-value k-(std)
Te 0.00 0.00 0.000 0.00000 0.00000 ?
Sb 2.61 2.60 2.209 0.01825 0.01825
Bi 38.11 37.94 18.771 0.35978 0.35978
Se 3.54 3.52 4.613 0.02340 0.07096
As 0.00 0.00 0.000 0.00000 0.00000 ?
S 14.88 14.81 47.773 0.15165 1.05338
Pb 27.95 27.83 13.888 0.26015 0.30590
Ag 13.36 13.30 12.746 0.09140 0.11385
Cu 0.00 0.00 0.000 0.00000 0.00000 ?
Au 0.00 0.00 0.000 0.00000 -0.00293 ?
-----------------------------------------------------------------------------
Total: 100.45 100.00 100.000
_x000C_
Intensity & Wt. % Group : calib Sample : calib_0029_QNT Page 25
Unknown Specimen No. 25
Path : 0213 Project : calib_0029
Position No. : 25 spot ID : 041-c3-4
Stage : X= 26.5538 Y= 25.2815 Z= 11.6060
Acc. Voltage : 20.0 (kV) Probe Dia. : 3.0 Scan : Off
Dated on 2024/02/14 15:03:46
WDS only No. of accumulation : 1
Curr.(A) : 9.713E-009
Element Peak(mm) Net(cps) Bg- Bg+ S.D.(%) D.L.(ppm) K-raw(%)
1 Te 104.924 -1.8 55.5 69.6 300.00 ? 1440 0.000
2 Sb 109.786 2.0 52.7 48.2 334.52 ? 1335 0.040
3 Bi 163.785 84.4 24.3 25.0 9.28 3421 6.116
4 Se 97.689 177.3 23.3 17.4 5.58 743 6.224
5 As 102.320 2.2 14.9 13.2 170.01 ? 1383 0.188
6 S 172.119 1445.6 24.1 11.3 1.78 318 88.765
7 Pb 169.322 1573.8 24.6 11.7 1.72 1956 81.890
8 Ag 133.118 182.2 26.8 21.5 5.58 643 2.916
9 Cu 107.018 -1.4 220.0 177.1 300.00 ? 785 0.000
10 Au 88.552 -16.8 329.9 316.5 300.00 ? 2607 0.000
Element f(chi) If/Ip abs-el 1/s-el r-el c/k-el c/k-std
Sb 0.5732 0.0000 0.6873 1.0836 0.9396 1.4290 1.4290
Bi 0.7200 0.0000 1.0344 0.8921 1.0531 1.0289 1.0289
Se 0.4142 0.0020 0.6374 1.2663 0.8544 1.4471 0.9395
As 0.3709 0.0020 0.5909 1.3074 0.8486 1.5223 0.9136
S 0.6874 0.0007 0.7698 1.7761 0.7661 0.9540 1.0249
Pb 0.7048 0.0000 1.0245 0.8917 1.0496 1.0429 1.0242
Ag 0.4955 0.0000 0.6226 1.1565 0.9219 1.5066 1.3893
Element El. mass% Norm El% At prop k-value k-(std)
Te 0.00 0.00 0.000 0.00000 0.00000 ?
Sb 0.0577 0.0590 0.0569 0.000404 0.000404
Bi 6.29 6.43 3.612 0.06116 0.06116
Se 2.97 3.03 4.513 0.02052 0.06224
As 0.0791 0.0807 0.1266 0.000519 0.001881
S 12.19 12.45 45.611 0.12779 0.88765
Pb 72.81 74.35 42.158 0.69643 0.81890
Ag 3.53 3.60 3.923 0.02341 0.02916
Cu 0.00 0.00 0.000 0.00000 0.00000 ?
Au 0.00 0.00 0.000 0.00000 -0.00255 ?
-----------------------------------------------------------------------------
Total: 97.93 100.00 100.000
_x000C_
Intensity & Wt. % Group : calib Sample : calib_0029_QNT Page 26
Unknown Specimen No. 26
Path : 0213 Project : calib_0029
Position No. : 26 spot ID : 041-c3-5
Stage : X= 26.5494 Y= 25.2839 Z= 11.6060
Acc. Voltage : 20.0 (kV) Probe Dia. : 3.0 Scan : Off
Dated on 2024/02/14 15:06:33
WDS only No. of accumulation : 1
Curr.(A) : 9.712E-009
Element Peak(mm) Net(cps) Bg- Bg+ S.D.(%) D.L.(ppm) K-raw(%)
1 Te 104.924 -6.5 61.9 81.9 300.00 ? 1540 0.000
2 Sb 109.786 1.1 51.0 47.4 615.85 ? 1319 0.022
3 Bi 163.785 88.3 25.8 19.5 8.75 3201 6.402
4 Se 97.689 174.9 22.7 16.1 5.59 722 6.140
5 As 102.320 -1.0 17.5 12.4 300.00 ? 1450 0.000
6 S 172.119 1416.9 23.1 9.6 1.80 304 87.016
7 Pb 169.322 1566.6 25.4 11.0 1.72 1974 81.524
8 Ag 133.118 176.1 28.7 20.9 5.71 649 2.818
9 Cu 107.018 -3.8 219.9 185.5 300.00 ? 796 0.000
10 Au 88.552 -13.5 322.1 310.2 300.00 ? 2577 0.000
Element f(chi) If/Ip abs-el 1/s-el r-el c/k-el c/k-std
Sb 0.5726 0.0000 0.6866 1.0859 0.9388 1.4288 1.4288
Bi 0.7199 0.0000 1.0343 0.8941 1.0522 1.0278 1.0278
Se 0.4141 0.0020 0.6373 1.2691 0.8536 1.4457 0.9386
S 0.6873 0.0007 0.7697 1.7800 0.7654 0.9530 1.0238
Pb 0.7047 0.0000 1.0243 0.8936 1.0487 1.0418 1.0231
Ag 0.4947 0.0000 0.6216 1.1590 0.9210 1.5071 1.3898
Element El. mass% Norm El% At prop k-value k-(std)
Te 0.00 0.00 0.000 0.00000 0.00000 ?
Sb 0.0309 0.0317 0.0308 0.000216 0.000216 ?
Bi 6.58 6.76 3.829 0.06402 0.06402
Se 2.93 3.01 4.508 0.02024 0.06140
As 0.00 0.00 0.000 0.00000 0.00000 ?
S 11.94 12.26 45.270 0.12527 0.87016
Pb 72.45 74.44 42.520 0.69332 0.81524
Ag 3.41 3.50 3.843 0.02262 0.02817
Cu 0.00 0.00 0.000 0.00000 0.00000 ?
Au 0.00 0.00 0.000 0.00000 -0.00205 ?
-----------------------------------------------------------------------------
Total: 97.34 100.00 100.000
_x000C_
Intensity & Wt. % Group : calib Sample : calib_0029_QNT Page 27
Unknown Specimen No. 27
Path : 0213 Project : calib_0029
Position No. : 27 spot ID : 041-c3-6
Stage : X= 26.5611 Y= 25.2728 Z= 11.6060
Acc. Voltage : 20.0 (kV) Probe Dia. : 0.0 Scan : Off
Dated on 2024/02/14 15:09:20
WDS only No. of accumulation : 1
Curr.(A) : 9.713E-009
Element Peak(mm) Net(cps) Bg- Bg+ S.D.(%) D.L.(ppm) K-raw(%)
1 Te 104.924 -2.1 61.8 62.2 300.00 ? 1449 0.000
2 Sb 109.786 111.7 53.5 49.4 8.79 1348 2.219
3 Bi 163.785 502.5 25.1 17.4 3.11 3079 36.413
4 Se 97.689 171.3 20.5 15.8 5.64 704 6.013
5 As 102.320 0.2 17.7 13.0 1606.86 ? 1465 0.021
6 S 172.119 1672.7 16.8 10.2 1.65 281 102.713
7 Pb 169.322 511.2 16.5 8.9 3.06 1619 26.598
8 Ag 133.118 590.5 25.0 17.6 2.86 601 9.450
9 Cu 107.018 5.7 191.1 153.8 221.76 ? 732 0.098
10 Au 88.552 -9.0 278.9 254.6 300.00 ? 2384 0.000
Element f(chi) If/Ip abs-el 1/s-el r-el c/k-el c/k-std
Sb 0.5908 0.0000 0.7085 1.0309 0.9592 1.4275 1.4275
Bi 0.7206 0.0001 1.0352 0.8484 1.0762 1.0579 1.0579
Se 0.4073 0.0027 0.6267 1.2034 0.8738 1.5132 0.9824
As 0.3624 0.0026 0.5775 1.2424 0.8679 1.6018 0.9613
S 0.6873 0.0030 0.7698 1.6888 0.7829 0.9796 1.0524
Pb 0.7050 0.0001 1.0247 0.8479 1.0727 1.0729 1.0536
Ag 0.5228 0.0009 0.6569 1.1001 0.9416 1.4684 1.3540
Cu 0.9173 0.0362 0.9374 1.3157 0.8939 0.8753 0.7834
Element El. mass% Norm El% At prop k-value k-(std)
Te 0.00 0.00 0.000 0.00000 0.00000 ?
Sb 3.17 3.34 2.823 0.02219 0.02219
Bi 38.60 40.74 20.036 0.36413 0.36413
Se 3.00 3.17 4.124 0.01982 0.06013
As 0.0091 0.0096 0.0131 0.000057 0.000205 ?
S 14.48 15.28 49.009 0.14787 1.02713
Pb 24.30 25.65 12.723 0.22620 0.26598
Ag 11.16 11.78 11.226 0.07587 0.09450
Cu 0.0266 0.0280 0.0454 0.000303 0.000979
Au 0.00 0.00 0.000 0.00000 -0.00136 ?
-----------------------------------------------------------------------------
Total: 94.75 100.00 100.000
_x000C_
Intensity & Wt. % Group : calib Sample : calib_0029_QNT Page 28
Unknown Specimen No. 28
Path : 0213 Project : calib_0029
Position No. : 28 spot ID : 041-c3-7
Stage : X= 26.6543 Y= 25.4184 Z= 11.6110
Acc. Voltage : 20.0 (kV) Probe Dia. : 6.0 Scan : Off
Dated on 2024/02/14 15:12:07
WDS only No. of accumulation : 1
Curr.(A) : 9.712E-009
Element Peak(mm) Net(cps) Bg- Bg+ S.D.(%) D.L.(ppm) K-raw(%)
1 Te 104.924 0.9 66.5 60.8 895.44 ? 1474 0.017
2 Sb 109.786 2.7 59.5 51.2 265.75 ? 1396 0.053
3 Bi 163.785 159.8 25.6 21.3 6.04 3282 11.581
4 Se 97.689 160.7 22.0 16.0 5.87 716 5.643
5 As 102.320 0.2 18.9 14.3 1942.37 ? 1521 0.018
6 S 172.119 1478.2 21.9 10.0 1.76 302 90.775
7 Pb 169.322 1396.4 26.4 9.8 1.83 1991 72.670
8 Ag 133.118 313.7 30.1 21.9 4.08 665 5.020
9 Cu 107.018 -2.9 214.8 178.3 300.00 ? 783 0.000
10 Au 88.552 -10.4 315.6 317.1 300.00 ? 2563 0.000
Element f(chi) If/Ip abs-el 1/s-el r-el c/k-el c/k-std
Te 0.6030 0.0000 0.7167 1.0400 0.9468 1.4170 1.4170
Sb 0.5744 0.0000 0.6887 1.0751 0.9426 1.4329 1.4329
Bi 0.7211 0.0000 1.0360 0.8851 1.0567 1.0320 1.0320
Se 0.4123 0.0021 0.6345 1.2562 0.8574 1.4601 0.9479
As 0.3683 0.0021 0.5869 1.2969 0.8516 1.5396 0.9240
S 0.6884 0.0013 0.7710 1.7621 0.7687 0.9563 1.0274
Pb 0.7059 0.0000 1.0260 0.8846 1.0532 1.0461 1.0273
Ag 0.5010 0.0000 0.6294 1.1474 0.9249 1.4970 1.3805
Element El. mass% Norm El% At prop k-value k-(std)
Te 0.0237 0.0241 0.0218 0.000167 0.000167 ?
Sb 0.0762 0.0777 0.0736 0.000532 0.000532
Bi 11.95 12.19 6.723 0.11581 0.11581
Se 2.72 2.77 4.044 0.01860 0.05643
As 0.0075 0.0076 0.0117 0.000049 0.000176 ?
S 12.50 12.74 45.814 0.13068 0.90775
Pb 64.76 66.03 36.737 0.61802 0.72670
Ag 6.04 6.15 6.575 0.04030 0.05020
Cu 0.00 0.00 0.000 0.00000 0.00000 ?
Au 0.00 0.00 0.000 0.00000 -0.00158 ?
-----------------------------------------------------------------------------
Total: 98.07 100.00 100.000
_x000C_
Intensity & Wt. % Group : calib Sample : calib_0029_QNT Page 29
Unknown Specimen No. 29
Path : 0213 Project : calib_0029
Position No. : 29 spot ID : 041-c3-8
Stage : X= 26.5490 Y= 25.8582 Z= 11.6060
Acc. Voltage : 20.0 (kV) Probe Dia. : 5.0 Scan : Off
Dated on 2024/02/14 15:14:54
WDS only No. of accumulation : 1
Curr.(A) : 9.711E-009
Element Peak(mm) Net(cps) Bg- Bg+ S.D.(%) D.L.(ppm) K-raw(%)
1 Te 104.924 7.9 55.8 50.5 92.09 1348 0.153
2 Sb 109.786 2.2 54.6 46.1 302.71 ? 1331 0.044
3 Bi 163.785 151.9 24.3 19.8 6.18 3177 11.008
4 Se 97.689 155.1 23.5 16.2 6.02 729 5.444
5 As 102.320 -1.5 17.9 14.3 300.00 ? 1492 0.000
6 S 172.119 1504.4 22.9 8.6 1.75 298 92.399
7 Pb 169.322 1440.2 22.3 9.6 1.79 1849 74.956
8 Ag 133.118 330.1 26.6 18.2 3.93 616 5.283
9 Cu 107.018 -1.7 219.2 179.6 300.00 ? 788 0.000
10 Au 88.552 -15.7 322.3 314.1 300.00 ? 2581 0.000
Element f(chi) If/Ip abs-el 1/s-el r-el c/k-el c/k-std
Te 0.6032 0.0000 0.7169 1.0400 0.9469 1.4166 1.4166
Sb 0.5744 0.0000 0.6887 1.0750 0.9427 1.4328 1.4328
Bi 0.7214 0.0000 1.0364 0.8850 1.0568 1.0316 1.0316
Se 0.4116 0.0021 0.6334 1.2561 0.8575 1.4626 0.9496
S 0.6888 0.0014 0.7714 1.7619 0.7687 0.9558 1.0269
Pb 0.7062 0.0000 1.0264 0.8846 1.0533 1.0456 1.0268
Ag 0.5016 0.0001 0.6302 1.1473 0.9250 1.4950 1.3786
Element El. mass% Norm El% At prop k-value k-(std)
Te 0.2172 0.2172 0.1963 0.001533 0.001533
Sb 0.0638 0.0638 0.0604 0.000445 0.000445
Bi 11.36 11.36 6.268 0.11008 0.11008
Se 2.63 2.63 3.835 0.01795 0.05444
As 0.00 0.00 0.000 0.00000 0.00000 ?
S 12.71 12.72 45.749 0.13302 0.92399
Pb 66.65 66.67 37.111 0.63746 0.74956
Ag 6.34 6.34 6.780 0.04242 0.05283
Cu 0.00 0.00 0.000 0.00000 0.00000 ?
Au 0.00 0.00 0.000 0.00000 -0.00239 ?
-----------------------------------------------------------------------------
Total: 99.97 100.00 100.000
_x000C_
Intensity & Wt. % Group : calib Sample : calib_0029_QNT Page 30
Unknown Specimen No. 30
Path : 0213 Project : calib_0029
Position No. : 30 spot ID : 041-c3-9
Stage : X= 26.5299 Y= 25.8641 Z= 11.6060
Acc. Voltage : 20.0 (kV) Probe Dia. : 0.0 Scan : Off
Dated on 2024/02/14 15:17:41
WDS only No. of accumulation : 1
Curr.(A) : 9.709E-009
Element Peak(mm) Net(cps) Bg- Bg+ S.D.(%) D.L.(ppm) K-raw(%)
1 Te 104.924 -718.6 40.2 1821.6 300.00 ? 5083 0.000
2 Sb 109.786 4.9 43.6 32.5 121.62 ? 1154 0.098
3 Bi 163.785 376.3 17.5 10.8 3.58 2490 27.277
4 Se 97.689 123.0 14.1 12.1 6.67 604 4.320
5 As 102.320 -0.3 12.8 8.9 300.00 ? 1237 0.000
6 S 172.119 953.2 7.0 6.9 2.19 206 58.553
7 Pb 169.322 49.7 8.6 5.8 11.07 1195 2.587
8 Ag 133.118 885.3 20.7 10.3 2.29 506 14.173
9 Cu 107.018 3.1 141.4 111.4 351.10 ? 626 0.053
10 Au 88.552 -7.1 199.4 167.8 300.00 ? 2000 0.000
Element f(chi) If/Ip abs-el 1/s-el r-el c/k-el c/k-std
Sb 0.5860 0.0000 0.7027 1.0032 0.9719 1.4595 1.4595
Bi 0.7168 0.0002 1.0299 0.8254 1.0913 1.0777 1.0777
Se 0.3982 0.0030 0.6127 1.1703 0.8866 1.5683 1.0182
S 0.6828 0.0066 0.7647 1.6429 0.7940 0.9960 1.0700
Pb 0.7008 0.0002 1.0185 0.8249 1.0878 1.0939 1.0743
Ag 0.5549 0.0001 0.6973 1.0704 0.9545 1.4037 1.2944
Cu 0.9180 0.0290 0.9381 1.2810 0.9033 0.8952 0.8012
Element El. mass% Norm El% At prop k-value k-(std)
Te 0.00 0.00 0.000 0.00000 0.00000 ?
Sb 0.1428 0.2374 0.1945 0.000978 0.000978
Bi 30.25 50.31 24.022 0.27276 0.27276
Se 2.25 3.74 4.721 0.01424 0.04320
As 0.00 0.00 0.000 0.00000 0.00000 ?
S 8.39 13.96 43.448 0.08429 0.58553
Pb 2.41 4.01 1.930 0.02200 0.02587
Ag 16.67 27.73 25.646 0.11378 0.14173
Cu 0.0146 0.0243 0.0382 0.000163 0.000527 ?
Au 0.00 0.00 0.000 0.00000 -0.00108 ?
-----------------------------------------------------------------------------
Total: 60.13 100.00 100.000
_x000C_
Intensity & Wt. % Group : calib Sample : calib_0029_QNT Page 31
Unknown Specimen No. 31
Path : 0213 Project : calib_0029
Position No. : 31 spot ID : 041-c3-10
Stage : X= 26.3890 Y= 25.7891 Z= 11.6060
Acc. Voltage : 20.0 (kV) Probe Dia. : 0.0 Scan : Off
Dated on 2024/02/14 15:20:29
WDS only No. of accumulation : 1
Curr.(A) : 9.710E-009
Element Peak(mm) Net(cps) Bg- Bg+ S.D.(%) D.L.(ppm) K-raw(%)
1 Te 104.924 -26.8 59.3 121.8 300.00 ? 1693 0.000
2 Sb 109.786 139.6 50.7 45.7 7.38 1305 2.774
3 Bi 163.785 519.2 24.5 18.2 3.06 3104 37.635
4 Se 97.689 175.3 18.3 15.6 5.54 687 6.156
5 As 102.320 3.2 13.8 11.2 115.42 ? 1313 0.269
6 S 172.119 1676.8 14.2 8.7 1.65 259 102.995
7 Pb 169.322 463.6 18.1 10.6 3.24 1709 24.130
8 Ag 133.118 613.9 25.9 17.9 2.80 609 9.826
9 Cu 107.018 -0.5 195.8 166.7 300.00 ? 754 0.000
10 Au 88.552 -12.6 296.4 264.1 300.00 ? 2452 0.000
Element f(chi) If/Ip abs-el 1/s-el r-el c/k-el c/k-std
Sb 0.5930 0.0000 0.7111 1.0280 0.9606 1.4242 1.4242
Bi 0.7193 0.0001 1.0335 0.8459 1.0779 1.0611 1.0611
Se 0.4052 0.0028 0.6236 1.1999 0.8752 1.5228 0.9887
As 0.3611 0.0026 0.5753 1.2387 0.8693 1.6099 0.9662
S 0.6859 0.0032 0.7682 1.6839 0.7841 0.9827 1.0558
Pb 0.7037 0.0001 1.0228 0.8455 1.0744 1.0763 1.0570
Ag 0.5255 0.0011 0.6602 1.0969 0.9430 1.4626 1.3488
Element El. mass% Norm El% At prop k-value k-(std)
Te 0.00 0.00 0.000 0.00000 0.00000 ?
Sb 3.95 4.14 3.478 0.02774 0.02774
Bi 40.01 41.93 20.520 0.37635 0.37635
Se 3.09 3.24 4.197 0.02029 0.06155
As 0.1196 0.1253 0.1711 0.000743 0.002690
S 14.57 15.27 48.710 0.14827 1.02995
Pb 22.11 23.17 11.438 0.20521 0.24130
Ag 11.56 12.12 11.486 0.07889 0.09826
Cu 0.00 0.00 0.000 0.00000 0.00000 ?
Au 0.00 0.00 0.000 0.00000 -0.00191 ?
-----------------------------------------------------------------------------
Total: 95.41 100.00 100.000
_x000C_
Intensity & Wt. % Group : calib Sample : calib_0029_QNT Page 32
Unknown Specimen No. 32
Path : 0213 Project : calib_0029
Position No. : 32 spot ID : 041-c3-11
Stage : X= 25.8160 Y= 25.6322 Z= 11.5915
Acc. Voltage : 20.0 (kV) Probe Dia. : 5.0 Scan : Off
Dated on 2024/02/14 15:23:16
WDS only No. of accumulation : 1
Curr.(A) : 9.708E-009
Element Peak(mm) Net(cps) Bg- Bg+ S.D.(%) D.L.(ppm) K-raw(%)
1 Te 104.924 -1.4 64.2 71.2 300.00 ? 1507 0.000
2 Sb 109.786 1.0 55.0 53.2 673.03 ? 1385 0.021
3 Bi 163.785 98.8 23.5 25.2 8.34 3412 7.160
4 Se 97.689 154.5 21.0 18.2 6.06 740 5.425
5 As 102.320 -0.2 17.5 14.0 300.00 ? 1476 0.000
6 S 172.119 1456.8 23.8 8.7 1.78 302 89.498
7 Pb 169.322 1569.1 23.9 11.5 1.72 1931 81.690
8 Ag 133.118 192.2 30.5 23.2 5.46 677 3.078
9 Cu 107.018 -5.4 224.7 181.6 300.00 ? 795 0.000
10 Au 88.552 -16.5 325.1 322.7 300.00 ? 2599 0.000
Element f(chi) If/Ip abs-el 1/s-el r-el c/k-el c/k-std
Sb 0.5725 0.0000 0.6865 1.0848 0.9390 1.4301 1.4301
Bi 0.7214 0.0000 1.0364 0.8932 1.0524 1.0264 1.0264
Se 0.4136 0.0020 0.6365 1.2678 0.8538 1.4484 0.9404
S 0.6889 0.0008 0.7716 1.7782 0.7655 0.9514 1.0221
Pb 0.7063 0.0000 1.0266 0.8927 1.0489 1.0403 1.0216
Ag 0.4951 0.0000 0.6221 1.1578 0.9212 1.5071 1.3897
Element El. mass% Norm El% At prop k-value k-(std)
Te 0.00 0.00 0.000 0.00000 0.00000 ?
Sb 0.0296 0.0301 0.0291 0.000207 0.000207 ?
Bi 7.35 7.47 4.214 0.07160 0.07160
Se 2.59 2.63 3.932 0.01788 0.05425
As 0.00 0.00 0.000 0.00000 0.00000 ?
S 12.26 12.46 45.814 0.12884 0.89497
Pb 72.40 73.61 41.874 0.69473 0.81690
Ag 3.72 3.79 4.136 0.02471 0.03078
Cu 0.00 0.00 0.000 0.00000 0.00000 ?
Au 0.00 0.00 0.000 0.00000 -0.00251 ?
-----------------------------------------------------------------------------
Total: 98.35 100.00 100.000
_x000C_
Intensity & Wt. % Group : calib Sample : calib_0029_QNT Page 33
Unknown Specimen No. 33
Path : 0213 Project : calib_0029
Position No. : 33 spot ID : 041-c3-12
Stage : X= 25.7862 Y= 25.6313 Z= 11.5915
Acc. Voltage : 20.0 (kV) Probe Dia. : 0.0 Scan : Off
Dated on 2024/02/14 15:26:04
WDS only No. of accumulation : 1
Curr.(A) : 9.713E-009
Element Peak(mm) Net(cps) Bg- Bg+ S.D.(%) D.L.(ppm) K-raw(%)
1 Te 104.924 -1.0 56.0 59.2 300.00 ? 1393 0.000
2 Sb 109.786 92.7 51.4 49.3 10.07 1335 1.841
3 Bi 163.785 516.3 23.9 17.0 3.06 3027 37.416
4 Se 97.689 191.7 20.5 15.5 5.28 700 6.728
5 As 102.320 -1.4 18.6 13.1 300.00 ? 1493 0.000
6 S 172.119 1685.0 15.0 7.9 1.64 257 103.467
7 Pb 169.322 525.4 16.5 10.0 3.02 1637 27.340
8 Ag 133.118 695.0 24.7 18.2 2.62 604 11.121
9 Cu 107.018 4.0 200.8 170.5 331.29 ? 763 0.068
10 Au 88.552 0.2 283.5 271.7 8084.23 ? 2416 0.003
Element f(chi) If/Ip abs-el 1/s-el r-el c/k-el c/k-std
Sb 0.5892 0.0000 0.7064 1.0308 0.9595 1.4313 1.4313
Bi 0.7194 0.0001 1.0335 0.8483 1.0766 1.0594 1.0594
Se 0.4068 0.0027 0.6260 1.2032 0.8742 1.5146 0.9833
S 0.6860 0.0032 0.7683 1.6886 0.7832 0.9810 1.0539
Pb 0.7037 0.0001 1.0228 0.8478 1.0731 1.0746 1.0553
Ag 0.5248 0.0007 0.6594 1.0999 0.9419 1.4627 1.3488
Cu 0.9173 0.0360 0.9375 1.3155 0.8942 0.8753 0.7834
Element El. mass% Norm El% At prop k-value k-(std)
Te 0.00 0.00 0.000 0.00000 0.00000 ?
Sb 2.64 2.68 2.274 0.01841 0.01841
Bi 39.66 40.33 19.939 0.37416 0.37416
Se 3.36 3.42 4.471 0.02218 0.06728
As 0.00 0.00 0.000 0.00000 0.00000 ?
S 14.61 14.86 47.885 0.14895 1.03467
Pb 24.99 25.41 12.674 0.23251 0.27340
Ag 13.07 13.29 12.726 0.08928 0.11121
Cu 0.0185 0.0188 0.0306 0.000211 0.000682 ?
Au 0.0035 0.0036 0.0019 0.000032 0.000032 ?
-----------------------------------------------------------------------------
Total: 98.36 100.00 100.000
_x000C_
Intensity & Wt. % Group : calib Sample : calib_0029_QNT Page 34
Unknown Specimen No. 34
Path : 0213 Project : calib_0029
Position No. : 34 spot ID : 041-c3-13
Stage : X= 26.3194 Y= 25.3805 Z= 11.5915
Acc. Voltage : 20.0 (kV) Probe Dia. : 0.0 Scan : Off
Dated on 2024/02/14 15:28:51
WDS only No. of accumulation : 1
Curr.(A) : 9.712E-009
Element Peak(mm) Net(cps) Bg- Bg+ S.D.(%) D.L.(ppm) K-raw(%)
1 Te 104.924 3.0 60.0 55.6 244.16 ? 1404 0.059
2 Sb 109.786 3.0 52.6 46.0 225.46 ? 1318 0.059
3 Bi 163.785 105.6 25.0 24.1 7.95 3397 7.654
4 Se 97.689 157.1 22.2 17.4 5.99 736 5.514
5 As 102.320 -2.3 18.5 13.9 300.00 ? 1503 0.000
6 S 172.119 1463.5 23.5 10.3 1.77 310 89.873
7 Pb 169.322 1586.2 25.9 10.9 1.71 1989 82.546
8 Ag 133.118 226.5 30.8 19.3 4.91 649 3.625
9 Cu 107.018 -0.6 221.2 182.8 300.00 ? 794 0.000
10 Au 88.552 114.3 328.2 322.3 17.26 2607 1.737
Element f(chi) If/Ip abs-el 1/s-el r-el c/k-el c/k-std
Te 0.6020 0.0000 0.7154 1.0506 0.9429 1.4110 1.4110
Sb 0.5724 0.0000 0.6863 1.0860 0.9387 1.4293 1.4293
Bi 0.7101 0.0000 1.0202 0.8942 1.0521 1.0418 1.0418
Se 0.4125 0.0019 0.6347 1.2693 0.8535 1.4514 0.9423
S 0.6765 0.0009 0.7577 1.7803 0.7653 0.9679 1.0398
Pb 0.6944 0.0000 1.0094 0.8937 1.0486 1.0571 1.0381
Ag 0.4955 0.0000 0.6225 1.1592 0.9210 1.5046 1.3874
Au 0.9505 0.0000 1.0017 0.9172 1.0236 1.0633 1.0633
Element El. mass% Norm El% At prop k-value k-(std)
Te 0.0831 0.0804 0.0749 0.000589 0.000589
Sb 0.0849 0.0821 0.0801 0.000594 0.000594
Bi 7.97 7.71 4.385 0.07654 0.07654
Se 2.64 2.55 3.840 0.01818 0.05514
As 0.00 0.00 0.000 0.00000 0.00000 ?
S 12.52 12.11 44.903 0.12938 0.89873
Pb 73.87 71.44 40.979 0.70201 0.82546
Ag 4.38 4.23 4.662 0.02910 0.03625
Cu 0.00 0.00 0.000 0.00000 0.00000 ?
Au 1.85 1.79 1.077 0.01737 0.01737
-----------------------------------------------------------------------------
Total: 103.40 100.00 100.000
_x000C_
Intensity & Wt. % Group : calib Sample : calib_0029_QNT Page 35
Unknown Specimen No. 35
Path : 0213 Project : calib_0029
Position No. : 35 spot ID : 041-c3-14
Stage : X= 26.3005 Y= 25.3988 Z= 11.5915
Acc. Voltage : 20.0 (kV) Probe Dia. : 0.0 Scan : Off
Dated on 2024/02/14 15:31:38
WDS only No. of accumulation : 1
Curr.(A) : 9.711E-009
Element Peak(mm) Net(cps) Bg- Bg+ S.D.(%) D.L.(ppm) K-raw(%)
1 Te 104.924 -5.4 60.2 67.7 300.00 ? 1464 0.000
2 Sb 109.786 2.1 51.6 50.5 333.41 ? 1345 0.041
3 Bi 163.785 111.6 23.2 22.4 7.58 3274 8.088
4 Se 97.689 150.8 22.3 14.8 6.07 702 5.296
5 As 102.320 -1.3 18.5 13.4 300.00 ? 1495 0.000
6 S 172.119 1473.3 24.8 9.0 1.77 308 90.484
7 Pb 169.322 1558.2 26.6 9.0 1.73 1987 81.100
8 Ag 133.118 234.4 28.6 19.3 4.79 636 3.751
9 Cu 107.018 -1.6 222.9 183.9 300.00 ? 796 0.000
10 Au 88.552 17.6 322.0 320.4 104.56 ? 2586 0.268
Element f(chi) If/Ip abs-el 1/s-el r-el c/k-el c/k-std
Sb 0.5726 0.0000 0.6866 1.0833 0.9395 1.4310 1.4310
Bi 0.7198 0.0000 1.0341 0.8920 1.0531 1.0295 1.0295
Se 0.4127 0.0020 0.6352 1.2660 0.8544 1.4526 0.9431
S 0.6871 0.0009 0.7695 1.7758 0.7660 0.9544 1.0254
Pb 0.7046 0.0000 1.0241 0.8915 1.0496 1.0435 1.0248
Ag 0.4965 0.0000 0.6239 1.1563 0.9218 1.5038 1.3867
Au 0.9506 0.0000 1.0018 0.9150 1.0242 1.0652 1.0652
Element El. mass% Norm El% At prop k-value k-(std)
Te 0.00 0.00 0.000 0.00000 0.00000 ?
Sb 0.0585 0.0585 0.0565 0.000409 0.000409
Bi 8.33 8.32 4.682 0.08088 0.08088
Se 2.54 2.53 3.774 0.01746 0.05296
As 0.00 0.00 0.000 0.00000 0.00000 ?
S 12.43 12.42 45.570 0.13026 0.90484
Pb 71.96 71.87 40.815 0.68971 0.81100
Ag 4.53 4.52 4.932 0.03011 0.03751
Cu 0.00 0.00 0.000 0.00000 0.00000 ?
Au 0.2855 0.2851 0.1703 0.002680 0.002680
-----------------------------------------------------------------------------
Total: 100.13 100.00 100.000
_x000C_
Intensity & Wt. % Group : calib Sample : calib_0029_QNT Page 36
Unknown Specimen No. 36
Path : 0213 Project : calib_0029
Position No. : 36 spot ID : 041-c3-15
Stage : X= 26.3099 Y= 25.3884 Z= 11.6015
Acc. Voltage : 20.0 (kV) Probe Dia. : 5.0 Scan : Off
Dated on 2024/02/14 15:34:24
WDS only No. of accumulation : 1
Curr.(A) : 9.711E-009
Element Peak(mm) Net(cps) Bg- Bg+ S.D.(%) D.L.(ppm) K-raw(%)
1 Te 104.924 7.0 59.3 61.8 109.27 ? 1429 0.136
2 Sb 109.786 -3.8 55.3 54.3 300.00 ? 1394 0.000
3 Bi 163.785 4.3 19.0 15.0 95.85 2783 0.313
4 Se 97.689 -0.2 23.4 17.7 300.00 ? 748 0.000
5 As 102.320 -0.9 16.9 12.5 300.00 ? 1433 0.000
6 S 172.119 -0.5 10.5 10.6 300.00 ? 254 0.000
7 Pb 169.322 -3.0 10.4 8.1 300.00 ? 1335 0.000
8 Ag 133.118 1840.6 27.0 18.5 1.58 621 29.460
9 Cu 107.018 -5.0 233.7 190.7 300.00 ? 813 0.000
10 Au 88.552 4261.7 353.0 287.7 1.12 2651 64.783
Element f(chi) If/Ip abs-el 1/s-el r-el c/k-el c/k-std
Te 0.5894 0.0000 0.7005 1.0642 0.9446 1.4202 1.4202
Bi 0.4341 0.0002 0.6237 0.9059 1.0541 1.6787 1.6787
Ag 0.5341 0.0000 0.6711 1.1742 0.9227 1.3752 1.2681
Au 0.9495 0.0000 1.0007 0.9285 1.0248 1.0503 1.0503
Element El. mass% Norm El% At prop k-value k-(std)
Te 0.1926 0.1904 0.2322 0.001356 0.001356
Sb 0.00 0.00 0.000 0.00000 0.00000 ?
Bi 0.5256 0.5196 0.3869 0.003131 0.003131
Se 0.00 0.00 0.000 0.00000 0.00000 ?
As 0.00 0.00 0.000 0.00000 0.00000 ?
S 0.00 0.00 0.000 0.00000 0.00000 ?
Pb 0.00 0.00 0.000 0.00000 0.00000 ?
Ag 32.48 32.11 46.302 0.23651 0.29460
Cu 0.00 0.00 0.000 0.00000 0.00000 ?
Au 67.96 67.18 53.079 0.64783 0.64783
-----------------------------------------------------------------------------
Total: 101.16 100.00 100.000
_x000C_
Intensity & Wt. % Group : calib Sample : calib_0029_QNT Page 37
Unknown Specimen No. 37
Path : 0213 Project : calib_0029
Position No. : 37 spot ID : 041-c3-16
Stage : X= 26.3076 Y= 25.3872 Z= 11.6015
Acc. Voltage : 20.0 (kV) Probe Dia. : 5.0 Scan : Off
Dated on 2024/02/14 15:37:11
WDS only No. of accumulation : 1
Curr.(A) : 9.712E-009
Element Peak(mm) Net(cps) Bg- Bg+ S.D.(%) D.L.(ppm) K-raw(%)
1 Te 104.924 7.1 61.1 61.4 108.00 ? 1440 0.138
2 Sb 109.786 1.9 54.4 48.7 362.16 ? 1349 0.038
3 Bi 163.785 4.8 19.0 16.0 89.10 2838 0.345
4 Se 97.689 0.6 21.2 17.4 743.25 ? 730 0.020
5 As 102.320 2.2 15.9 11.1 171.76 ? 1379 0.187
6 S 172.119 -1.8 10.8 11.4 300.00 ? 261 0.000
7 Pb 169.322 -2.8 9.5 9.2 300.00 ? 1312 0.000
8 Ag 133.118 1831.4 25.4 19.3 1.59 618 29.310
9 Cu 107.018 -1.3 237.7 184.8 300.00 ? 807 0.000
10 Au 88.552 4271.4 353.4 285.5 1.12 2650 64.924
Element f(chi) If/Ip abs-el 1/s-el r-el c/k-el c/k-std
Te 0.5897 0.0000 0.7008 1.0643 0.9446 1.4195 1.4195
Sb 0.5604 0.0000 0.6719 1.1002 0.9404 1.4386 1.4386
Bi 0.4340 0.0002 0.6235 0.9060 1.0540 1.6792 1.6792
Se 0.3762 0.0010 0.5789 1.2864 0.8552 1.5686 1.0184
As 0.3331 0.0008 0.5308 1.3283 0.8494 1.6687 1.0015
Ag 0.5339 0.0001 0.6708 1.1743 0.9227 1.3758 1.2687
Au 0.9495 0.0000 1.0007 0.9285 1.0248 1.0502 1.0502
Element El. mass% Norm El% At prop k-value k-(std)
Te 0.1963 0.1937 0.2362 0.001383 0.001383
Sb 0.0541 0.0534 0.0682 0.000376 0.000376
Bi 0.5798 0.5722 0.4260 0.003453 0.003453
Se 0.0103 0.0102 0.0200 0.000066 0.000199 ?
As 0.0861 0.0849 0.1764 0.000516 0.001868
S 0.00 0.00 0.000 0.00000 0.00000 ?
Pb 0.00 0.00 0.000 0.00000 0.00000 ?
Ag 32.32 31.89 45.993 0.23531 0.29310
Cu 0.00 0.00 0.000 0.00000 0.00000 ?
Au 68.09 67.19 53.081 0.64924 0.64924
-----------------------------------------------------------------------------
Total: 101.34 100.00 100.000
_x000C_
Intensity & Wt. % Group : calib Sample : calib_0029_QNT Page 38
Unknown Specimen No. 38
Path : 0213 Project : calib_0029
Position No. : 38 spot ID : 041-c4-1
Stage : X= 30.0501 Y= 23.1436 Z= 11.6790
Acc. Voltage : 20.0 (kV) Probe Dia. : 0.0 Scan : Off
Dated on 2024/02/14 15:39:59
WDS only No. of accumulation : 1
Curr.(A) : 9.711E-009
Element Peak(mm) Net(cps) Bg- Bg+ S.D.(%) D.L.(ppm) K-raw(%)
1 Te 104.924 3.5 63.0 57.1 216.83 ? 1433 0.068
2 Sb 109.786 -0.9 52.0 52.7 300.00 ? 1364 0.000
3 Bi 163.785 127.3 26.2 22.0 6.99 3330 9.229
4 Se 97.689 228.9 22.0 17.1 4.80 731 8.037
5 As 102.320 -0.6 18.0 13.6 300.00 ? 1484 0.000
6 S 172.119 1387.8 24.6 10.2 1.82 314 85.234
7 Pb 169.322 1445.7 21.8 10.3 1.79 1841 75.241
8 Ag 133.118 250.2 28.3 17.6 4.60 621 4.005
9 Cu 107.018 7.4 224.7 181.1 184.37 ? 794 0.128
10 Au 88.552 -11.9 320.2 320.2 300.00 ? 2581 0.000
Element f(chi) If/Ip abs-el 1/s-el r-el c/k-el c/k-std
Te 0.6038 0.0000 0.7175 1.0443 0.9458 1.4111 1.4111
Bi 0.7163 0.0000 1.0292 0.8887 1.0555 1.0358 1.0358
Se 0.4140 0.0020 0.6370 1.2614 0.8564 1.4504 0.9416
S 0.6833 0.0010 0.7652 1.7693 0.7678 0.9610 1.0324
Pb 0.7009 0.0000 1.0188 0.8882 1.0520 1.0504 1.0315
Ag 0.4989 0.0000 0.6269 1.1521 0.9239 1.4987 1.3820
Cu 0.9163 0.0463 0.9364 1.3764 0.8808 0.8419 0.7535
Element El. mass% Norm El% At prop k-value k-(std)
Te 0.0957 0.0981 0.0900 0.000678 0.000678
Sb 0.00 0.00 0.000 0.00000 0.00000 ?
Bi 9.56 9.80 5.489 0.09229 0.09229
Se 3.84 3.94 5.842 0.02650 0.08037
As 0.00 0.00 0.000 0.00000 0.00000 ?
S 11.79 12.09 44.127 0.12270 0.85234
Pb 67.39 69.09 39.028 0.63988 0.75241
Ag 4.82 4.94 5.361 0.03215 0.04005
Cu 0.0334 0.0342 0.0630 0.000396 0.001279
Au 0.00 0.00 0.000 0.00000 -0.00180 ?
-----------------------------------------------------------------------------
Total: 97.54 100.00 100.000
_x000C_
Intensity & Wt. % Group : calib Sample : calib_0029_QNT Page 39
Unknown Specimen No. 39
Path : 0213 Project : calib_0029
Position No. : 39 spot ID : 041-c4-2
Stage : X= 30.0262 Y= 23.1566 Z= 11.6790
Acc. Voltage : 20.0 (kV) Probe Dia. : 0.0 Scan : Off
Dated on 2024/02/14 15:42:46
WDS only No. of accumulation : 1
Curr.(A) : 9.711E-009
Element Peak(mm) Net(cps) Bg- Bg+ S.D.(%) D.L.(ppm) K-raw(%)
1 Te 104.924 2.0 60.3 57.6 372.61 ? 1416 0.039
2 Sb 109.786 -2.6 58.3 52.4 300.00 ? 1398 0.000
3 Bi 163.785 115.5 27.2 24.8 7.55 3481 8.375
4 Se 97.689 229.5 19.5 19.1 4.81 742 8.057
5 As 102.320 -2.4 20.3 14.3 300.00 ? 1560 0.000
6 S 172.119 1398.5 19.8 10.8 1.81 298 85.889
7 Pb 169.322 1461.3 24.7 7.4 1.78 1902 76.053
8 Ag 133.118 234.8 28.1 21.0 4.80 647 3.758
9 Cu 107.018 6.2 218.9 172.9 215.45 ? 779 0.107
10 Au 88.552 1.4 320.8 315.5 1282.05 ? 2578 0.022
Element f(chi) If/Ip abs-el 1/s-el r-el c/k-el c/k-std
Te 0.6040 0.0000 0.7178 1.0440 0.9458 1.4109 1.4109
Bi 0.7165 0.0000 1.0295 0.8885 1.0555 1.0358 1.0358
Se 0.4147 0.0020 0.6382 1.2610 0.8564 1.4480 0.9401
S 0.6835 0.0010 0.7655 1.7688 0.7678 0.9609 1.0324
Pb 0.7012 0.0000 1.0191 0.8880 1.0520 1.0503 1.0314
Ag 0.4985 0.0000 0.6264 1.1518 0.9239 1.5003 1.3835
Cu 0.9164 0.0466 0.9365 1.3760 0.8808 0.8418 0.7534
Au 0.9510 0.0000 1.0023 0.9115 1.0257 1.0672 1.0672
Element El. mass% Norm El% At prop k-value k-(std)
Te 0.0546 0.0562 0.0514 0.000387 0.000387
Sb 0.00 0.00 0.000 0.00000 0.00000 ?
Bi 8.67 8.93 4.985 0.08375 0.08375
Se 3.85 3.96 5.852 0.02656 0.08057
As 0.00 0.00 0.000 0.00000 0.00000 ?
S 11.88 12.22 44.503 0.12365 0.85889
Pb 68.15 70.12 39.501 0.64679 0.76053
Ag 4.53 4.66 5.041 0.03017 0.03759
Cu 0.0280 0.0288 0.0529 0.000332 0.001072
Au 0.0231 0.0237 0.0141 0.000216 0.000216 ?
-----------------------------------------------------------------------------
Total: 97.18 100.00 100.000
_x000C_
Intensity & Wt. % Group : calib Sample : calib_0029_QNT Page 40
Unknown Specimen No. 40
Path : 0213 Project : calib_0029
Position No. : 40 spot ID : 041-c4-3
Stage : X= 29.9902 Y= 23.1716 Z= 11.6790
Acc. Voltage : 20.0 (kV) Probe Dia. : 0.0 Scan : Off
Dated on 2024/02/14 15:45:33
WDS only No. of accumulation : 1
Curr.(A) : 9.710E-009
Element Peak(mm) Net(cps) Bg- Bg+ S.D.(%) D.L.(ppm) K-raw(%)
1 Te 104.924 -4.9 65.4 79.8 300.00 ? 1554 0.000
2 Sb 109.786 1.0 58.2 51.3 735.10 ? 1390 0.019
3 Bi 163.785 105.0 25.0 23.8 7.97 3384 7.611
4 Se 97.689 237.4 18.3 16.5 4.67 699 8.335
5 As 102.320 1.0 19.2 13.8 417.17 ? 1522 0.083
6 S 172.119 1370.4 20.9 9.9 1.83 297 84.177
7 Pb 169.322 1523.5 24.3 10.9 1.75 1936 79.301
8 Ag 133.118 203.2 26.2 15.9 5.15 594 3.252
9 Cu 107.018 0.2 224.1 183.4 6278.45 ? 797 0.004
10 Au 88.552 -8.5 320.9 306.3 300.00 ? 2570 0.000
Element f(chi) If/Ip abs-el 1/s-el r-el c/k-el c/k-std
Sb 0.5738 0.0000 0.6880 1.0841 0.9399 1.4265 1.4265
Bi 0.7156 0.0000 1.0282 0.8926 1.0535 1.0342 1.0342
Se 0.4144 0.0019 0.6377 1.2669 0.8548 1.4453 0.9383
As 0.3707 0.0021 0.5907 1.3081 0.8489 1.5213 0.9130
S 0.6826 0.0008 0.7645 1.7770 0.7664 0.9598 1.0311
Pb 0.7002 0.0000 1.0178 0.8921 1.0501 1.0488 1.0300
Ag 0.4964 0.0000 0.6238 1.1571 0.9222 1.5024 1.3854
Element El. mass% Norm El% At prop k-value k-(std)
Te 0.00 0.00 0.000 0.00000 0.00000 ?
Sb 0.0271 0.0276 0.0268 0.000190 0.000190 ?
Bi 7.87 8.01 4.539 0.07612 0.07612
Se 3.97 4.04 6.062 0.02748 0.08335
As 0.0349 0.0355 0.0561 0.000229 0.000830 ?
S 11.63 11.83 43.712 0.12118 0.84177
Pb 70.87 72.07 41.220 0.67441 0.79301
Ag 3.92 3.99 4.382 0.02611 0.03252
Cu 0.0010 0.0010 0.0018 0.000011 0.000037 ?
Au 0.00 0.00 0.000 0.00000 -0.00128 ?
-----------------------------------------------------------------------------
Total: 98.34 100.00 100.000
_x000C_
Intensity & Wt. % Group : calib Sample : calib_0029_QNT Page 41
Unknown Specimen No. 41
Path : 0213 Project : calib_0029
Position No. : 41 spot ID : 041-c4-4
Stage : X= 30.0641 Y= 23.1666 Z= 11.6760
Acc. Voltage : 20.0 (kV) Probe Dia. : 0.0 Scan : Off
Dated on 2024/02/14 15:48:20
WDS only No. of accumulation : 1
Curr.(A) : 9.711E-009
Element Peak(mm) Net(cps) Bg- Bg+ S.D.(%) D.L.(ppm) K-raw(%)
1 Te 104.924 5.8 63.6 55.3 131.11 ? 1428 0.113
2 Sb 109.786 -3.1 59.0 50.6 300.00 ? 1389 0.000
3 Bi 163.785 132.2 25.4 20.6 6.77 3244 9.583
4 Se 97.689 215.5 21.5 16.4 4.95 719 7.564
5 As 102.320 -0.8 18.7 12.0 300.00 ? 1479 0.000
6 S 172.119 1394.3 21.6 11.4 1.82 309 85.634
7 Pb 169.322 1445.9 23.3 10.1 1.79 1891 75.251
8 Ag 133.118 270.9 28.8 18.9 4.41 634 4.336
9 Cu 107.018 49.4 224.6 178.5 28.87 790 0.853
10 Au 88.552 -17.7 324.0 312.4 300.00 ? 2585 0.000
Element f(chi) If/Ip abs-el 1/s-el r-el c/k-el c/k-std
Te 0.6039 0.0000 0.7177 1.0435 0.9461 1.4115 1.4115
Bi 0.7167 0.0000 1.0296 0.8880 1.0558 1.0358 1.0358
Se 0.4124 0.0020 0.6346 1.2604 0.8567 1.4565 0.9456
S 0.6836 0.0011 0.7656 1.7679 0.7680 0.9608 1.0322
Pb 0.7013 0.0000 1.0193 0.8876 1.0523 1.0503 1.0315
Ag 0.4999 0.0000 0.6281 1.1512 0.9242 1.4964 1.3799
Cu 0.9162 0.0459 0.9363 1.3754 0.8810 0.8427 0.7542
Element El. mass% Norm El% At prop k-value k-(std)
Te 0.1592 0.1619 0.1484 0.001128 0.001128
Sb 0.00 0.00 0.000 0.00000 0.00000 ?
Bi 9.93 10.10 5.648 0.09583 0.09583
Se 3.63 3.69 5.471 0.02494 0.07564
As 0.00 0.00 0.000 0.00000 0.00000 ?
S 11.84 12.04 43.930 0.12328 0.85634
Pb 67.34 68.48 38.644 0.63997 0.75251
Ag 5.21 5.30 5.742 0.03481 0.04336
Cu 0.2229 0.2267 0.4171 0.002645 0.008533
Au 0.00 0.00 0.000 0.00000 -0.00269 ?
-----------------------------------------------------------------------------
Total: 98.33 100.00 100.000
_x000C_
Intensity & Wt. % Group : calib Sample : calib_0029_QNT Page 42
Unknown Specimen No. 42
Path : 0213 Project : calib_0029
Position No. : 42 spot ID : 041-c4-5
Stage : X= 30.0995 Y= 23.1517 Z= 11.6760
Acc. Voltage : 20.0 (kV) Probe Dia. : 0.0 Scan : Off
Dated on 2024/02/14 15:51:07
WDS only No. of accumulation : 1
Curr.(A) : 9.711E-009
Element Peak(mm) Net(cps) Bg- Bg+ S.D.(%) D.L.(ppm) K-raw(%)
1 Te 104.924 6.1 65.5 55.1 126.93 ? 1441 0.118
2 Sb 109.786 -0.2 58.1 51.7 300.00 ? 1392 0.000
3 Bi 163.785 127.2 25.0 22.8 7.00 3338 9.217
4 Se 97.689 226.4 22.5 14.9 4.80 705 7.948
5 As 102.320 -0.7 18.9 13.7 300.00 ? 1512 0.000
6 S 172.119 1406.4 20.6 10.2 1.81 298 86.380
7 Pb 169.322 1458.5 21.2 9.7 1.78 1811 75.907
8 Ag 133.118 259.1 30.6 18.8 4.53 644 4.147
9 Cu 107.018 72.4 224.1 179.2 20.21 791 1.251
10 Au 88.552 -21.2 332.0 320.8 300.00 ? 2618 0.000
Element f(chi) If/Ip abs-el 1/s-el r-el c/k-el c/k-std
Te 0.6045 0.0000 0.7184 1.0425 0.9465 1.4107 1.4107
Bi 0.7162 0.0000 1.0290 0.8872 1.0563 1.0369 1.0369
Se 0.4128 0.0020 0.6352 1.2592 0.8571 1.4559 0.9452
S 0.6831 0.0011 0.7651 1.7663 0.7684 0.9621 1.0336
Pb 0.7008 0.0000 1.0186 0.8868 1.0528 1.0516 1.0327
Ag 0.4999 0.0000 0.6281 1.1502 0.9246 1.4971 1.3805
Cu 0.9165 0.0460 0.9365 1.3742 0.8813 0.8429 0.7544
Element El. mass% Norm El% At prop k-value k-(std)
Te 0.1660 0.1681 0.1535 0.001177 0.001177
Sb 0.00 0.00 0.000 0.00000 0.00000 ?
Bi 9.56 9.68 5.394 0.09217 0.09217
Se 3.82 3.86 5.699 0.02620 0.07948
As 0.00 0.00 0.000 0.00000 0.00000 ?
S 11.96 12.11 44.007 0.12435 0.86380
Pb 67.97 68.81 38.691 0.64554 0.75907
Ag 4.99 5.05 5.449 0.03329 0.04147
Cu 0.3268 0.3308 0.6065 0.003877 0.012508
Au 0.00 0.00 0.000 0.00000 -0.00322 ?
-----------------------------------------------------------------------------
Total: 98.79 100.00 100.000
_x000C_
Intensity & Wt. % Group : calib Sample : calib_0029_QNT Page 43
Unknown Specimen No. 43
Path : 0213 Project : calib_0029
Position No. : 43 spot ID : 041-c4-6
Stage : X= 30.0088 Y= 23.1343 Z= 11.6795
Acc. Voltage : 20.0 (kV) Probe Dia. : 0.0 Scan : Off
Dated on 2024/02/14 15:53:55
WDS only No. of accumulation : 1
Curr.(A) : 9.711E-009
Element Peak(mm) Net(cps) Bg- Bg+ S.D.(%) D.L.(ppm) K-raw(%)
1 Te 104.924 -1.6 24.4 30.6 300.00 ? 955 0.000
2 Sb 109.786 -2.2 26.1 21.5 300.00 ? 915 0.000
3 Bi 163.785 -0.2 10.1 7.6 300.00 ? 2000 0.000
4 Se 97.689 0.3 11.9 7.4 846.36 ? 503 0.012
5 As 102.320 0.7 8.3 6.6 372.13 ? 1015 0.062
6 S 172.119 0.8 5.8 4.8 270.68 ? 178 0.051
7 Pb 169.322 -0.2 6.5 4.2 300.00 ? 1034 0.000
8 Ag 133.118 780.2 15.3 12.6 2.44 490 12.488
9 Cu 107.018 -4.1 112.6 93.4 300.00 ? 567 0.000
10 Au 88.552 1380.3 159.1 138.3 2.03 1792 20.983
Element f(chi) If/Ip abs-el 1/s-el r-el c/k-el c/k-std
Se 0.3713 0.0013 0.5714 1.2659 0.8621 1.6017 1.0399
As 0.3280 0.0009 0.5226 1.3070 0.8562 1.7083 1.0253
S 0.4044 0.0077 0.4530 1.7754 0.7727 1.5970 1.7157
Ag 0.5526 0.0000 0.6943 1.1559 0.9297 1.3404 1.2360
Au 0.9498 0.0000 1.0010 0.9144 1.0297 1.0611 1.0611
Element El. mass% Norm El% At prop k-value k-(std)
Te 0.00 0.00 0.000 0.00000 0.00000 ?
Sb 0.00 0.00 0.000 0.00000 0.00000 ?
Bi 0.00 0.00 0.000 0.00000 0.00000 ?
Se 0.0063 0.0165 0.0312 0.000040 0.000120 ?
As 0.0294 0.0768 0.1529 0.000172 0.000624 ?
S 0.0118 0.0307 0.1429 0.000074 0.000512
Pb 0.00 0.00 0.000 0.00000 0.00000 ?
Ag 14.76 38.50 53.209 0.10025 0.12488
Cu 0.00 0.00 0.000 0.00000 0.00000 ?
Au 23.52 61.37 46.464 0.20983 0.20983
-----------------------------------------------------------------------------
Total: 38.32 100.00 100.000
_x000C_
Intensity & Wt. % Group : calib Sample : calib_0029_QNT Page 44
Unknown Specimen No. 44
Path : 0213 Project : calib_0029
Position No. : 44 spot ID : 041-c4-7
Stage : X= 30.0057 Y= 23.1402 Z= 11.6795
Acc. Voltage : 20.0 (kV) Probe Dia. : 0.0 Scan : Off
Dated on 2024/02/14 15:56:42
WDS only No. of accumulation : 1
Curr.(A) : 9.709E-009
Element Peak(mm) Net(cps) Bg- Bg+ S.D.(%) D.L.(ppm) K-raw(%)
1 Te 104.924 -3.8 33.2 31.0 300.00 ? 1046 0.000
2 Sb 109.786 0.7 26.3 24.6 653.27 ? 949 0.015
3 Bi 163.785 1.6 8.9 7.2 174.93 ? 1919 0.117
4 Se 97.689 0.9 12.4 8.8 333.92 ? 534 0.033
5 As 102.320 -0.4 11.2 4.9 300.00 ? 1097 0.000
6 S 172.119 0.3 6.7 5.7 713.97 ? 193 0.021
7 Pb 169.322 0.7 6.1 3.5 349.64 ? 990 0.036
8 Ag 133.118 848.6 15.3 12.8 2.34 492 13.586
9 Cu 107.018 1.0 123.3 96.2 1027.23 ? 582 0.017
10 Au 88.552 1644.6 182.6 150.2 1.85 1909 25.006
Element f(chi) If/Ip abs-el 1/s-el r-el c/k-el c/k-std
Sb 0.5601 0.0000 0.6716 1.0892 0.9448 1.4470 1.4470
Bi 0.4455 0.0002 0.6400 0.8969 1.0593 1.6443 1.6443
Se 0.3732 0.0012 0.5744 1.2733 0.8596 1.5889 1.0316
Pb 0.4227 0.0002 0.6144 0.8964 1.0558 1.7194 1.6886
Ag 0.5459 0.0000 0.6859 1.1626 0.9271 1.3526 1.2473
Au 0.9496 0.0000 1.0008 0.9195 1.0279 1.0572 1.0572
Element El. mass% Norm El% At prop k-value k-(std)
Te 0.00 0.00 0.000 0.00000 0.00000 ?
Sb 0.0213 0.0483 0.0600 0.000147 0.000147 ?
Bi 0.1924 0.4366 0.3164 0.001169 0.001169
Se 0.0171 0.0389 0.0746 0.000108 0.000327 ?
As 0.00 0.00 0.000 0.00000 0.00000 ?
S 0.0048 0.0108 0.0510 0.000030 0.000205 ?
Pb 0.0524 0.1188 0.0868 0.000304 0.000358
Ag 15.98 36.25 50.882 0.10907 0.13586
Cu 0.0043 0.0097 0.0231 0.000052 0.000167 ?
Au 27.80 63.09 48.506 0.25006 0.25006
-----------------------------------------------------------------------------
Total: 44.07 100.00 100.000
_x000C_
Intensity & Wt. % Group : calib Sample : calib_0029_QNT Page 45
Unknown Specimen No. 45
Path : 0213 Project : calib_0029
Position No. : 45 spot ID : 041-c4-8
Stage : X= 30.0080 Y= 23.1471 Z= 11.6795
Acc. Voltage : 20.0 (kV) Probe Dia. : 0.0 Scan : Off
Dated on 2024/02/14 15:59:29
WDS only No. of accumulation : 1
Curr.(A) : 9.709E-009
Element Peak(mm) Net(cps) Bg- Bg+ S.D.(%) D.L.(ppm) K-raw(%)
1 Te 104.924 4.3 67.1 60.4 183.32 ? 1477 0.083
2 Sb 109.786 6.6 59.8 54.0 111.38 ? 1418 0.131
3 Bi 163.785 50.8 24.0 16.1 12.46 2984 3.685
4 Se 97.689 25.0 22.6 14.6 20.86 701 0.876
5 As 102.320 -0.8 17.5 14.2 300.00 ? 1479 0.000
6 S 172.119 155.8 10.7 9.5 5.71 247 9.570
7 Pb 169.322 47.7 9.9 7.6 11.63 1301 2.481
8 Ag 133.118 1522.2 22.7 21.0 1.74 616 24.368
9 Cu 107.018 -5.1 225.6 190.8 300.00 ? 808 0.000
10 Au 88.552 3883.3 360.6 285.8 1.18 2673 59.043
Element f(chi) If/Ip abs-el 1/s-el r-el c/k-el c/k-std
Te 0.5921 0.0000 0.7037 1.0611 0.9444 1.4181 1.4181
Sb 0.5636 0.0000 0.6758 1.0969 0.9402 1.4348 1.4348
Bi 0.4534 0.0001 0.6514 0.9033 1.0538 1.6123 1.6123
Se 0.3834 0.0010 0.5901 1.2825 0.8550 1.5439 1.0024
S 0.4076 0.0051 0.4565 1.7985 0.7666 1.5807 1.6982
Pb 0.4307 0.0001 0.6260 0.9029 1.0503 1.6841 1.6539
Ag 0.5250 0.0001 0.6597 1.1709 0.9225 1.4034 1.2941
Au 0.9499 0.0000 1.0011 0.9259 1.0247 1.0529 1.0529
Element El. mass% Norm El% At prop k-value k-(std)
Te 0.1174 0.1152 0.1332 0.000828 0.000828
Sb 0.1881 0.1846 0.2236 0.001311 0.001311
Bi 5.94 5.83 4.114 0.03685 0.03685
Se 0.4461 0.4378 0.8180 0.002889 0.008764
As 0.00 0.00 0.000 0.00000 0.00000 ?
S 2.18 2.14 9.833 0.01378 0.09570
Pb 3.55 3.49 2.482 0.02110 0.02481
Ag 27.40 26.89 36.767 0.19563 0.24368
Cu 0.00 0.00 0.000 0.00000 0.00000 ?
Au 62.07 60.92 45.629 0.59043 0.59043
-----------------------------------------------------------------------------
Total: 101.89 100.00 100.000
_x000C_
Intensity & Wt. % Group : calib Sample : calib_0029_QNT Page 46
Unknown Specimen No. 46
Path : 0213 Project : calib_0029
Position No. : 46 spot ID : 041-c4-9
Stage : X= 30.0140 Y= 23.1503 Z= 11.6795
Acc. Voltage : 20.0 (kV) Probe Dia. : 0.0 Scan : Off
Dated on 2024/02/14 16:02:16
WDS only No. of accumulation : 1
Curr.(A) : 9.709E-009
Element Peak(mm) Net(cps) Bg- Bg+ S.D.(%) D.L.(ppm) K-raw(%)
1 Te 104.924 1.0 65.6 55.0 757.27 ? 1441 0.019
2 Sb 109.786 65.5 55.2 51.8 13.46 1376 1.301
3 Bi 163.785 544.9 24.8 17.6 2.98 3082 39.500
4 Se 97.689 258.2 21.2 14.5 4.44 691 9.067
5 As 102.320 -2.6 20.8 13.5 300.00 ? 1563 0.000
6 S 172.119 1663.8 18.2 9.3 1.66 282 102.210
7 Pb 169.322 501.6 16.1 12.2 3.09 1656 26.112
8 Ag 133.118 692.2 22.2 15.8 2.62 568 11.082
9 Cu 107.018 20.6 204.7 161.8 63.96 753 0.356
10 Au 88.552 57.4 297.1 269.6 31.55 2460 0.873
Element f(chi) If/Ip abs-el 1/s-el r-el c/k-el c/k-std
Te 0.6107 0.0000 0.7258 0.9994 0.9630 1.4316 1.4316
Sb 0.5885 0.0000 0.7057 1.0330 0.9589 1.4307 1.4307
Bi 0.7103 0.0001 1.0205 0.8501 1.0758 1.0713 1.0713
Se 0.4092 0.0026 0.6297 1.2059 0.8735 1.5037 0.9762
S 0.6761 0.0030 0.7572 1.6922 0.7827 0.9942 1.0681
Pb 0.6942 0.0001 1.0090 0.8496 1.0724 1.0877 1.0681
Ag 0.5225 0.0005 0.6565 1.1023 0.9413 1.4674 1.3531
Cu 0.9178 0.0374 0.9379 1.3183 0.8937 0.8724 0.7808
Au 0.9522 0.0000 1.0035 0.8736 1.0376 1.0994 1.0994
Element El. mass% Norm El% At prop k-value k-(std)
Te 0.0276 0.0272 0.0222 0.000193 0.000193 ?
Sb 1.86 1.83 1.567 0.01301 0.01301
Bi 42.29 41.64 20.755 0.39500 0.39500
Se 4.49 4.43 5.838 0.02989 0.09067
As 0.00 0.00 0.000 0.00000 0.00000 ?
S 14.63 14.41 46.806 0.14714 1.02210
Pb 24.14 23.78 11.953 0.22206 0.26112
Ag 13.05 12.85 12.403 0.08897 0.11082
Cu 0.0963 0.0948 0.1555 0.001104 0.003561
Au 0.9597 0.9451 0.4998 0.008729 0.008729
-----------------------------------------------------------------------------
Total: 101.54 100.00 100.000
_x000C_
Intensity & Wt. % Group : calib Sample : calib_0029_QNT Page 47
Unknown Specimen No. 47
Path : 0213 Project : calib_0029
Position No. : 47 spot ID : 041-c4-10
Stage : X= 30.0107 Y= 23.1545 Z= 11.6795
Acc. Voltage : 20.0 (kV) Probe Dia. : 0.0 Scan : Off
Dated on 2024/02/14 16:05:03
WDS only No. of accumulation : 1
Curr.(A) : 9.708E-009
Element Peak(mm) Net(cps) Bg- Bg+ S.D.(%) D.L.(ppm) K-raw(%)
1 Te 104.924 0.5 61.5 62.6 1496.76 ? 1449 0.010
2 Sb 109.786 65.0 53.0 47.9 13.28 1335 1.292
3 Bi 163.785 535.7 27.0 20.3 3.02 3271 38.842
4 Se 97.689 263.0 19.7 17.3 4.43 719 9.235
5 As 102.320 -1.0 17.9 11.9 300.00 ? 1454 0.000
6 S 172.119 1607.5 16.6 8.4 1.69 268 98.760
7 Pb 169.322 520.4 17.5 11.4 3.04 1698 27.093
8 Ag 133.118 666.3 27.2 18.0 2.68 618 10.668
9 Cu 107.018 16.1 204.1 166.5 82.27 760 0.278
10 Au 88.552 31.2 294.5 270.1 56.85 2452 0.474
Element f(chi) If/Ip abs-el 1/s-el r-el c/k-el c/k-std
Te 0.6102 0.0000 0.7252 1.0024 0.9619 1.4301 1.4301
Sb 0.5879 0.0000 0.7049 1.0362 0.9578 1.4295 1.4295
Bi 0.7117 0.0001 1.0225 0.8527 1.0746 1.0672 1.0672
Se 0.4088 0.0025 0.6291 1.2096 0.8724 1.5024 0.9754
S 0.6776 0.0029 0.7590 1.6975 0.7817 0.9901 1.0636
Pb 0.6957 0.0001 1.0112 0.8522 1.0711 1.0833 1.0638
Ag 0.5215 0.0005 0.6552 1.1057 0.9402 1.4675 1.3533
Cu 0.9175 0.0375 0.9377 1.3222 0.8929 0.8706 0.7792
Au 0.9520 0.0000 1.0033 0.8762 1.0369 1.0971 1.0971
Element El. mass% Norm El% At prop k-value k-(std)
Te 0.0140 0.0140 0.0115 0.000098 0.000098 ?
Sb 1.85 1.85 1.594 0.01292 0.01292
Bi 41.45 41.42 20.847 0.38842 0.38842
Se 4.57 4.57 6.089 0.03044 0.09235
As 0.00 0.00 0.000 0.00000 0.00000 ?
S 14.08 14.06 46.151 0.14218 0.98760
Pb 24.96 24.94 12.662 0.23041 0.27093
Ag 12.57 12.56 12.243 0.08564 0.10668
Cu 0.0750 0.0749 0.1240 0.000861 0.002778
Au 0.5201 0.5197 0.2776 0.004741 0.004741
-----------------------------------------------------------------------------
Total: 100.08 100.00 100.000
_x000C_
Intensity & Wt. % Group : calib Sample : calib_0029_QNT Page 48
Unknown Specimen No. 48
Path : 0213 Project : calib_0029
Position No. : 48 spot ID : 041-c4-11
Stage : X= 30.0336 Y= 23.2977 Z= 11.6795
Acc. Voltage : 20.0 (kV) Probe Dia. : 0.0 Scan : Off
Dated on 2024/02/14 16:07:50
WDS only No. of accumulation : 1
Curr.(A) : 9.710E-009
Element Peak(mm) Net(cps) Bg- Bg+ S.D.(%) D.L.(ppm) K-raw(%)
1 Te 104.924 -3.3 57.6 64.4 300.00 ? 1430 0.000
2 Sb 109.786 -2.1 50.3 49.5 300.00 ? 1331 0.000
3 Bi 163.785 86.4 26.2 21.1 8.98 3288 6.259
4 Se 97.689 233.6 22.0 18.4 4.76 748 8.202
5 As 102.320 -1.0 19.0 14.3 300.00 ? 1524 0.000
6 S 172.119 1422.2 23.4 9.2 1.80 303 87.358
7 Pb 169.322 1577.7 23.6 11.3 1.71 1918 82.121
8 Ag 133.118 178.1 31.6 21.3 5.70 669 2.851
9 Cu 107.018 2.7 225.1 173.4 504.58 ? 784 0.046
10 Au 88.552 -11.9 322.1 317.3 300.00 ? 2584 0.000
Element f(chi) If/Ip abs-el 1/s-el r-el c/k-el c/k-std
Bi 0.7169 0.0000 1.0300 0.8919 1.0537 1.0331 1.0331
[truncated: 6,722 more rows]
